# Supplementary material for: Highly selective direct reductive amidation of nitroarenes with carboxylic acids using cobalt(ii) phthalocyanine/PMHS
Source: Royal Society of Chemistry journal article supplement (doi:10.1039/c3ra46619a), 2014-01-01
Supplement: c3ra46619a1.pdf [file c3ra46619a1.pdf]

# Highly Selective Direct Reductive Amidation of Nitroarenes with Carboxylic Acids using Cobalt(II) Phthalocyanine/PMHS

Vishal Kumar, Manoranjan Kumar, Sushila Sharma and Neeraj Kumar\*

*Natural Plant Products Division, CSIR-Institute of Himalayan Bioresource Technology, Palampur, Himachal Pradesh 176 061, India*

[neerajnpp@rediffmail.com](mailto:neerajnpp@rediffmail.com); [neeraj@ihbt.res.in](mailto:neeraj@ihbt.res.in)

## Supporting information

### Table of Contents

**General experimental**

**Procedure for synthesis of metal phthalocyanines**

**General experimental procedure for reductive amidation of nitroarenes**

**Procedure for recyclability of the catalyst**

**Reductive amidation of nitrobenzene in different solvents using stoichiometric amount of carboxylic acids (Table S1)**

**Reductive amidation of nitrobenzene in different solvents in the presence of mineral acids using stoichiometric amount of carboxylic acids (Table S2)**

**Spectral data of isolated compounds**

**<sup>1</sup>H and <sup>13</sup>C NMR spectra of synthesized compounds**

**HRMS (ESI) spectra of isolated compounds**

**Mechanistic investigation**

**References**

## General experimental

Metal salts used were purchased from Merck, Germany. Metal phthalocyanines were synthesized by a reported procedure with some modification and characterized by FTIR and UV-VIS spectroscopy. Silica gel (60-120 mesh) used for column chromatography was purchased from Sisco Research Laboratories Pvt. Ltd. India and all other chemicals were purchased from Spectrochem, India, Merck, Germany, and Sigma-Aldrich, USA and were used without further purification. NMR spectra were recorded on Bruker Avance-300/600 spectrometers. Mass spectra were recorded on QTOF-Micro of Waters Micromass and Maxis-Bruker. The GC-MS analysis was carried out on a Shimadzu (QP 2010) series Gas Chromatogram-Mass Spectrometer (Tokyo, Japan), AOC-20i auto-sampler coupled, and a DB-5MS capillary column, (30 m x 0.25 mm i.d., 0.25 $\mu$ m). The initial temperature of column was 70 °C held for 4 min. and was programmed to 230 °C at 4°C/min., then held for 15 min. at 230 °C; the sample injection volume was 2  $\mu$ L in GC grade dichloromethane. Helium was used as carrier gas at a flow rate of 1.1 ml min<sup>-1</sup> on split mode (1: 50).

## Procedure for synthesis of metal phthalocyanines

Metal phthalocyanines were synthesized by using a reported method with some modification.

### Synthesis of Cobalt (II) phthalocyanine

A mixture of phthalimide (26.28 g, 0.18 mol), urea (55.2 g, 0.92 mol), CoCl<sub>2</sub>.6H<sub>2</sub>O (11.85 g, 0.05 mol) and ammonium molybdate (4.69 g, 0.0038 mol) was heated under microwave irradiation for 3 min. The reaction mixture was cooled to room temperature and in sequence washed with 5% NaOH, distilled water and 2% HCl and finally with distilled water again. After that the resulting solid was dissolved in minimum quantity of concentrated H<sub>2</sub>SO<sub>4</sub> and poured in distilled water to precipitate the desired cobalt (II) phthalocyanine, which were then filtered to give 9.5 g (48.5% yield) of cobalt (II) phthalocyanine.

### Synthesis of Iron, Nickel and Copper(II) phthalocyanines

Iron, Nickel and Copper(II) phthalocyanines were prepared from FeSO<sub>4</sub>.7H<sub>2</sub>O, NiCl<sub>2</sub> and CuSO<sub>4</sub>.7H<sub>2</sub>O respectively using same procedure as described above.

## General experimental procedure for reductive amidation of nitroarenes with carboxylic acids

To a stirred suspension of CoPc (0.01 mmol) in carboxylic acid (2 mL) were added nitroarene (1.0 mmol) and PMHS (4.0 H equiv.) at room temperature and then the temperature was raised to 100 °C. On completion of the reaction (as monitored by TLC), reaction mixture was dried under vacuum and the

crude product was analyzed directly by GC-MS. For the purification of desired product column chromatography was carried out (*n*-hexane: ethyl acetate).

### Procedure for recyclability of the catalyst

To a stirred suspension of CoPc (0.01 mmol) in acetic acid (2 mL) were added nitrobenzene (1.0 mmol) and PMHS (4.0 H equiv.) at room temperature and then the temperature was raised to 100 °C. After 12 h, the reaction mixture was analyzed by GC and GC-MS. Further, nitrobenzene (1.0 mmol) and PMHS (4.0 H equiv.) were added to the reaction mixture and stirred at 100 °C for 12 h. The same procedure was repeated for further cycles and excellent yield of product was observed up to three cycles, whereas in fourth cycle the yield was reduced.

**Table S1.** Reductive amidation of nitrobenzene in different solvents using stoichiometric amount of carboxylic acids<sup>a</sup>

| entry | carboxylic acid     | solvent | yield (%) <sup>b</sup> |
|-------|---------------------|---------|------------------------|
| 1     | AcOH                | EtOH    | nr                     |
| 2     | AcOH                | MeOH    | 5                      |
| 3     | AcOH                | MeCN    | nr                     |
| 4     | AcOH                | DMSO    | nr                     |
| 5     | AcOH                | DMF     | nr                     |
| 6     | AcOH                | Toluene | nr                     |
| 7     | AcOH                | PEG-400 | nr                     |
| 8     | AcOH                | EG      | 7                      |
| 9     | AcOH                | DCE     | nr                     |
| 10    | PhCO <sub>2</sub> H | EG      | nr                     |
| 11    | Cinnamic acid       | EG      | nr                     |

<sup>a</sup>Reaction conditions: nitrobenzene (1.0 mmol), carboxylic acid (5.0 mmol), CoPc (1 mol%), PMHS (4.0 H equiv.), <sup>b</sup>GC yield. DMSO = dimethylsulfoxide, DMF = dimethylformamide, PEG = polyethylene glycol, EG = ethylene glycol, DCE = dichloroethane.

**Table S2** Reductive amidation of nitrobenzene in different solvents in the presence of mineral acids using stoichiometric amount of carboxylic acids<sup>a</sup>

| entry | solvent | yield (%) <sup>b</sup> |
|-------|---------|------------------------|
| 1     | EtOH    | nr                     |
| 2     | MeOH    | 6                      |
| 3     | MeCN    | nr                     |
| 4     | DMSO    | nr                     |
| 5     | DMF     | 9                      |
| 6     | Toluene | nr                     |
| 7     | PEG-400 | 18                     |
| 8     | EG      | 22                     |
| 9     | DCE     | 10                     |
| 10    | EG      | 20 <sup>c</sup>        |
| 11    | EG      | 12 <sup>d</sup>        |
| 12    | EG      | 24 <sup>e</sup>        |
| 13    | EG      | 7 <sup>f</sup>         |
| 14    | EG      | 20 <sup>g</sup>        |

<sup>a</sup>Reaction conditions: nitrobenzene (1.0 mmol), AcOH (3.0 mmol), CoPc (1 mol%), PMHS (4.0 H equiv.), 1M HCl in solvent (2 mL) at 100 °C for 12h. <sup>b</sup>Isolated yield. <sup>c</sup>1M HBr was used instead of HCl. <sup>d</sup>2.0 mmol AcOH was used. <sup>e</sup>5.0 mmol AcOH was used. <sup>f</sup>0.5M HCl was used. <sup>g</sup>2.0M HCl was used. nr = no reaction, DMSO = dimethylsulfoxide, DMF = dimethylformamide, PEG = polyethylene glycol, EG = ethylene glycol, DCE = dichloroethane.

## Spectral data of isolated compounds

### 1. *N*-Acetylaniline (Table 2, entry 1)<sup>1</sup>

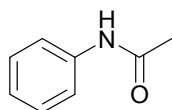

<sup>1</sup>H NMR (CDCl<sub>3</sub>, 300 MHz)  $\delta$  2.15 (s, 3H), 7.10 (t, 1H, J = 7.3 Hz), 7.28-7.33 (m, 2H), 7.52 (d, 2H, J = 7.7 Hz), 8.01 (brs, 1H); <sup>13</sup>C NMR (CDCl<sub>3</sub>, 75 MHz)  $\delta$  24.8, 120.5, 124.6, 129.3, 138.4, 169.3; HRESIMS calcd for C<sub>8</sub>H<sub>10</sub>NO [M+H]<sup>+</sup> 136.0762, found 136.0734.

### 2. *N*-Acetyl-4-fluoroaniline (Table 2, entry 2)<sup>2</sup>

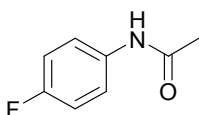

<sup>1</sup>H NMR (CD<sub>3</sub>OD, 300 MHz)  $\delta$  2.11 (s, 3H), 7.00-7.06 (m, 2H), 7.50-7.55 (m, 2H); <sup>13</sup>C NMR (CD<sub>3</sub>OD, 75 MHz)  $\delta$  22.6, 115.0, 115.3, 121.9, 122.0, 135.0, 158.0, 161.2, 170.5; HRESIMS calcd for C<sub>8</sub>H<sub>8</sub>N<sub>3</sub>OS [M+H]<sup>+</sup> 154.0668, found 154.0631.

### 3. *N*-Acetyl-4-chloroaniline (Table 2, entry 3)<sup>3</sup>

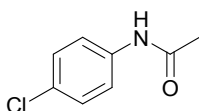

<sup>1</sup>H NMR (CD<sub>3</sub>OD, 300 MHz)  $\delta$  2.09 (s, 3H), 7.20 (d, 2H, J = 8.8 Hz), 7.46 (d, 2H, J = 8.8 Hz); <sup>13</sup>C NMR (CD<sub>3</sub>OD, 75 MHz)  $\delta$  23.8, 121.6, 129.0, 129.2, 137.3, 170.4; HRESIMS calcd for C<sub>8</sub>H<sub>9</sub>ClNO [M+H]<sup>+</sup> 170.0373, found 169.0348.

### 4. *N*-Acetyl-4-bromoaniline (Table 2, entry 4)<sup>4</sup>

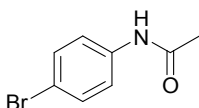

<sup>1</sup>H NMR (CD<sub>3</sub>OD, 300 MHz)  $\delta$  2.04 (s, 3H), 7.29-7.38 (m, 4H); <sup>13</sup>C NMR (CD<sub>3</sub>OD, 75 MHz)  $\delta$  23.6, 116.5, 121.5, 131.6, 137.4, 169.8; HRESIMS calcd for C<sub>9</sub>H<sub>9</sub>N<sub>2</sub>O [M+H]<sup>+</sup> 213.9868, found 213.9811.

### 5. 4-(*N*-Acetylamino)toluene (Table 2, entry 5)<sup>5</sup>

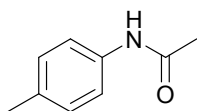

$^1\text{H}$  NMR ( $\text{CD}_3\text{OD}$ , 300 MHz)  $\delta$  2.15 (s, 3H), 2.31 (s, 3H), 7.10 (d, 2H,  $J = 8.1$  Hz), 7.38 (d, 2H,  $J = 8.1$  Hz), 7.69 (brs, 1H);  $^{13}\text{C}$  NMR ( $\text{CD}_3\text{OD}$ , 75 MHz)  $\delta$  21.2, 24.7, 120.5, 129.8, 134.2, 135.8, 168.9; HRESIMS calcd for  $\text{C}_9\text{H}_{12}\text{NO}$   $[\text{M}+\text{H}]^+$  150.0919, found 150.0950.

**6. 4-(*N*-Acetylamino)phenol (Table 2, entry 6)<sup>5</sup>**

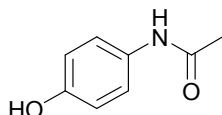

$^1\text{H}$  NMR ( $\text{CD}_3\text{OD}$ , 300 MHz)  $\delta$  2.09 (s, 3H), 6.71-6.76 (m, 2H), 7.28-7.32 (m, 2H);  $^{13}\text{C}$  NMR ( $\text{CD}_3\text{OD}$ , 75 MHz)  $\delta$  24.2, 116.9, 124.1, 132.4, 156.1, 172.1; HRESIMS calcd for  $\text{C}_8\text{H}_{10}\text{NO}_2$   $[\text{M}+\text{H}]^+$  152.0712, found 152.0729.

**7. Methyl-3-(*N*-acetylamino)benzoate (Table 2, entry 7)<sup>6</sup>**

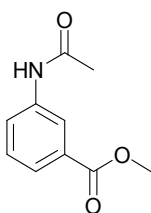

$^1\text{H}$  NMR ( $\text{CD}_3\text{OD}$ , 300 MHz)  $\delta$  2.14 (s, 3H), 3.89 (s, 3H), 7.37-7.42 (m, 1H), 7.71-7.73 (m, 1H), 7.77-7.81 (m, 1H), 8.21 (s, 1H);  $^{13}\text{C}$  NMR ( $\text{CD}_3\text{OD}$ , 75 MHz)  $\delta$  22.8, 51.6, 120.8, 124.4, 124.8, 128.9, 130.9, 139.3, 167.2, 170.7; HRESIMS calcd for  $\text{C}_{10}\text{H}_{12}\text{NO}_3$   $[\text{M}+\text{H}]^+$  194.0817, found 194.0809.

**8. 3-(*N*-Acetylamino)benzonitrile (Table 2, entry 8)<sup>1</sup>**

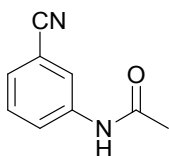

$^1\text{H}$  NMR ( $\text{CDCl}_3$ , 600 MHz)  $\delta$  2.20 (s, 3H), 7.38-7.41 (m, 2H), 7.72 (d, 1H,  $J = 6.6$  Hz), 7.89 (s, 1H), 7.93 (s, 1H);  $^{13}\text{C}$  NMR ( $\text{CDCl}_3$ , 150 MHz)  $\delta$  24.5, 112.8, 118.5, 122.8, 123.9, 127.6, 129.9, 138.8, 168.9; HRESIMS calcd for  $\text{C}_9\text{H}_9\text{N}_2\text{O}$   $[\text{M}+\text{H}]^+$  161.0715, found 161.0704.

**9. 4-(*N*-Acetylamino)acetophenone (Table 2, entry 9)<sup>7</sup>**

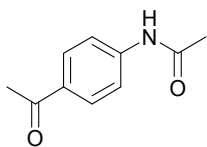

<sup>1</sup>H NMR (CD<sub>3</sub>OD, 300 MHz)  $\delta$  2.16 (s, 3H), 2.56 (s, 3H), 7.68-7.71 (m, 2H), 7.94-7.97 (m, 2H); <sup>13</sup>C NMR (CD<sub>3</sub>OD, 75 MHz)  $\delta$  23.0, 25.4, 119.0, 129.6, 132.6, 143.7, 170.9, 198.4; HRESIMS calcd for C<sub>8</sub>H<sub>8</sub>N<sub>3</sub>O<sub>3</sub> [M+H]<sup>+</sup> 178.0868, found 178.0851.

#### 10. 1,4-Di-(*N*-acetylamino)benzene (Table 2, entry 10)<sup>5</sup>

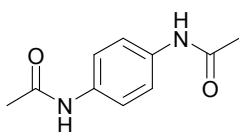

<sup>1</sup>H NMR (DMSO-d<sub>6</sub>, 600 MHz)  $\delta$  1.99 (s, 6H), 7.45 (s, 4H), 9.83 (s, 2H); <sup>13</sup>C NMR (DMSO-d<sub>6</sub>, 150 MHz)  $\delta$  24.3, 119.8, 135.0, 168.4; HRESIMS calcd for C<sub>10</sub>H<sub>13</sub>N<sub>2</sub>O<sub>2</sub> [M+H]<sup>+</sup> 193.0977, found 193.0942.

#### 11. 3-(*N*-Acetylamino)styrene (Table 2, entry 11)<sup>8</sup>

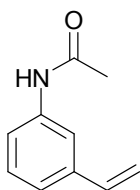

<sup>1</sup>H NMR (CD<sub>3</sub>OD, 300 MHz)  $\delta$  2.13 (s, 3H), 5.24 (d, 1H, *J* = 11.0 Hz), 5.76 (d, 1H, *J* = 17.5 Hz), 6.66-6.75 (m, 1H), 7.16 (d, 1H, *J* = 7.6 Hz), 7.26 (m, 1H), 7.43 (d, 1H, *J* = 8.0 Hz), 7.65 (s, 1H); <sup>13</sup>C NMR (CD<sub>3</sub>OD, 75 MHz)  $\delta$  24.3, 114.8, 119.2, 121.0, 123.5, 130.4, 138.4, 140.1, 140.6, 172.1; HRESIMS calcd for C<sub>10</sub>H<sub>12</sub>NO [M+H]<sup>+</sup> 162.0919, found 162.0933.

#### 12. *N*-Acetyl-3-nitroaniline (Table 2, entry 12)<sup>9</sup>

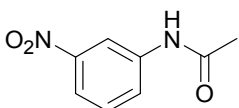

<sup>1</sup>H NMR (CD<sub>3</sub>OD, 600 MHz)  $\delta$  2.15 (s, 3H), 7.50 (s, 1H), 7.82 (d, 1H, *J* = 6.0 Hz), 7.90 (d, 1H, *J* = 6.0 Hz), 8.57 (s, 1H); <sup>13</sup>C NMR (CD<sub>3</sub>OD, 150 MHz)  $\delta$  24.2, 115.6, 119.6, 126.6, 131.1, 141.6, 150.2, 172.3; HRESIMS calcd for C<sub>8</sub>H<sub>9</sub>N<sub>2</sub>O<sub>3</sub> [M+H]<sup>+</sup> 181.0613, found 181.0637.

#### 13. 1,4-Di-(*N*-acetylamino)benzene (Table 2, entry 13)<sup>5</sup>

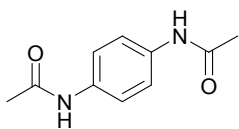

$^1\text{H}$  NMR (DMSO- $d_6$ , 300 MHz)  $\delta$  2.00 (s, 6H), 7.46 (s, 4H), 9.85 (s, 2H);  $^{13}\text{C}$  NMR (DMSO- $d_6$ , 75 MHz)  $\delta$  24.1, 119.6, 134.8, 168.2; HRESIMS calcd for  $\text{C}_{10}\text{H}_{13}\text{N}_2\text{O}_2$   $[\text{M}+\text{H}]^+$  193.0977, found 193.0934.

**14. 2-(*N*-Acetylamino)fluorine (Table 2, entry 14)<sup>10</sup>**

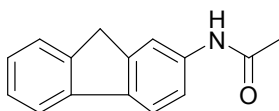

$^1\text{H}$  NMR ( $\text{CD}_3\text{OD}$ , 300 MHz)  $\delta$  2.14 (s, 3H), 3.82 (s, 2H), 7.21-7.26 (m, 1H), 7.29-7.34 (m, 1H), 7.45-7.50 (m, 2H), 7.68-7.73 (m, 2H), 7.80 (s, 1H);  $^{13}\text{C}$  NMR ( $\text{CD}_3\text{OD}$ , 75 MHz)  $\delta$  24.0, 37.8, 118.2, 120.2, 120.5, 121.0, 126.1, 127.5, 127.9, 138.9, 139.3, 142.7, 144.6, 145.4, 171.7; HRESIMS calcd for  $\text{C}_{15}\text{H}_{14}\text{NO}$   $[\text{M}+\text{H}]^+$  224.1075, found 224.1021.

**15. 4-(*N*-Acetylamino)phthalide (Table 2, entry 15)<sup>11</sup>**

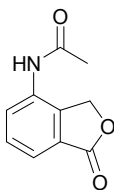

$^1\text{H}$  NMR (DMSO- $d_6$ , 600 MHz)  $\delta$  2.06 (s, 3H), 5.32 (s, 2H), 7.56 (d, 1H,  $J = 6.0$  Hz), 7.75 (d, 1H,  $J = 6.0$  Hz), 8.17 (s, 1H), 10.28 (s, 1H);  $^{13}\text{C}$  NMR (DMSO- $d_6$ , 150 MHz)  $\delta$  24.1, 69.8, 114.0, 123.3, 125.2, 125.5, 140.1, 141.6, 168.9, 170.7; HRESIMS calcd for  $\text{C}_{10}\text{H}_{10}\text{NO}_3$   $[\text{M}+\text{H}]^+$  192.0661, found 192.0637.

**16. 6-(*N*-Acetylamino)benzothiazole (Table 2, entry 16)<sup>12</sup>**

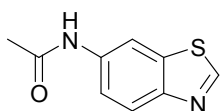

$^1\text{H}$  NMR ( $\text{CD}_3\text{OD}$ , 300 MHz)  $\delta$  2.17 (s, 3H), 7.52 (dd, 1H,  $J = 1.8, 8.8$  Hz), 7.95 (d, 1H,  $J = 8.8$  Hz), 8.47 (d, 1H,  $J = 1.8$  Hz), 9.11 (s, 1H);  $^{13}\text{C}$  NMR ( $\text{CD}_3\text{OD}$ , 75 MHz)  $\delta$  22.9, 112.5, 119.5, 122.7, 134.6, 137.0, 149.4, 154.9, 170.8; HRESIMS calcd for  $\text{C}_9\text{H}_9\text{N}_2\text{OS}$   $[\text{M}+\text{H}]^+$  193.0436, found 193.0411.

**17. 4-(*N*-Acetylamino)-2,1,3-benzothiadiazole (Table 2, entry 17)<sup>13</sup>**



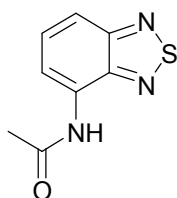

$^1\text{H}$  NMR ( $\text{CD}_3\text{OD}$ , 300 MHz)  $\delta$  2.31 (s, 3H), 7.58-7.63 (m, 1H), 7.68-7.71 (m, 1H), 8.32 (d, 1H,  $J = 7.1$  Hz);  $^{13}\text{C}$  NMR ( $\text{CD}_3\text{OD}$ , 75 MHz)  $\delta$  24.4, 117.6, 118.3, 132.0, 132.2, 149.9, 156.8, 172.7; HRESIMS calcd for  $\text{C}_8\text{H}_8\text{N}_3\text{OS}$   $[\text{M}+\text{H}]^+$  194.0388, found 194.0345.

#### 18. 5-(*N*-Acetylamino)isoquinoline (Table 2, entry 18)<sup>14</sup>

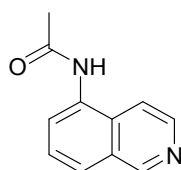

$^1\text{H}$  NMR ( $\text{CD}_3\text{OD}$ , 300 MHz)  $\delta$  2.31 (s, 3H), 7.67-7.31 (m, 1H), 7.93-8.01 (m, 3H), 8.48 (d, 1H,  $J = 6.0$  Hz), 9.26 (s, 1H);  $^{13}\text{C}$  NMR ( $\text{CD}_3\text{OD}$ , 75 MHz)  $\delta$  23.5, 117.5, 127.1, 128.2, 128.9, 130.8, 132.7, 134.0, 143.1, 153.6, 172.9; HRESIMS calcd for  $\text{C}_{11}\text{H}_{11}\text{N}_2\text{O}$   $[\text{M}+\text{H}]^+$  187.0871, found 187.0886.

#### 19. 4-(*N*-acetylamino)phthalimide (Table 2, entry 19)

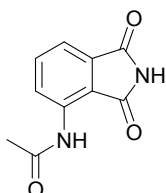

$^1\text{H}$  NMR ( $\text{DMSO-d}_6$ , 300 MHz)  $\delta$  2.11 (s, 3H), 7.73 (d, 1H,  $J = 8.1$  Hz), 7.80-7.84 (m, 1H), 8.12-8.13 (m, 1H), 10.52 (s, 1H), 11.56 (brs, 1H);  $^{13}\text{C}$  NMR ( $\text{DMSO-d}_6$ , 75 MHz)  $\delta$  24.1, 112.3, 123.0, 123.9, 126.2, 134.0, 144.6, 168.7, 168.9, 169.1.

#### 20. 6-(*N*-Acetylamino)chromone (Table 2, entry 20)<sup>15</sup>

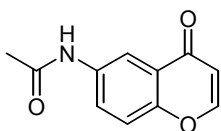

$^1\text{H}$  NMR ( $\text{DMSO-d}_6$ , 300 MHz)  $\delta$  2.07 (s, 3H), 6.30 (d, 1H,  $J = 6.0$  Hz), 7.58 (d, 1H,  $J = 9.0$  Hz), 7.88-7.92 (m, 1H), 8.24 (d, 1H,  $J = 6.0$  Hz), 8.30 (s, 1H), 10.25 (s, 1H);  $^{13}\text{C}$  NMR ( $\text{DMSO-d}_6$ , 75 MHz)  $\delta$  24.8, 112.5, 114.0, 119.8, 125.2, 126.4, 137.4, 152.6, 157.5, 169.4, 171.1; HRESIMS calcd for  $\text{C}_{11}\text{H}_{10}\text{NO}_3$   $[\text{M}+\text{H}]^+$  204.0661, found 204.0643.

### 21. 4-(*N*-Acetylamino)chalcone (Table 2, entry 21)<sup>16</sup>

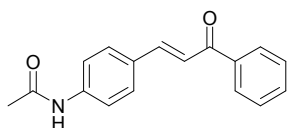

<sup>1</sup>H NMR (CD<sub>3</sub>OD, 600 MHz)  $\delta$  2.13 (s, 1H), 7.53 (d, 2H, J = 6.0 Hz), 7.61-7.75 (m, 7H), 8.05 (d, 2H, J = 6.0 Hz); <sup>13</sup>C NMR (CD<sub>3</sub>OD, 150 MHz)  $\delta$  23.9, 120.8, 121.5, 129.5, 129.6, 130.5, 131.6, 134.0, 139.4, 142.3, 145.8, 171.7, 192.2; HRESIMS calcd for C<sub>10</sub>H<sub>12</sub>NO<sub>3</sub> [M+H]<sup>+</sup> 266.1181, found 266.1169.

### 22. *N*-Phenylpropanamide (Table 3, entry 3)<sup>5</sup>

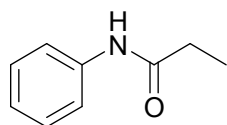

<sup>1</sup>H NMR (CD<sub>3</sub>OD, 300 MHz)  $\delta$  1.20 (t, 3H, J = 7.5 Hz), 2.39 (q, 2H, J = 7.5 Hz), 7.08 (t, 1H, J = 7.4 Hz), 7.27-7.32 (m, 2H), 7.54 (d, 2H, J = 7.7 Hz); <sup>13</sup>C NMR (CD<sub>3</sub>OD, 75 MHz)  $\delta$  9.2, 30.0, 120.2, 124.0, 128.7, 138.9, 174.4; HRESIMS calcd for C<sub>9</sub>H<sub>12</sub>NO [M+H]<sup>+</sup> 150.0919, found 150.0922.

### 23. *N*-Phenylbutanamide (Table 3, entry 4)<sup>17</sup>

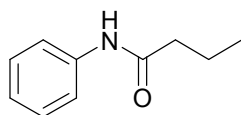

<sup>1</sup>H NMR (CD<sub>3</sub>OD, 600 MHz)  $\delta$  0.99-1.00 (m, 3H), 1.71-1.72 (m, 2H), 2.33 (s, 2H), 7.07 (s, 1H), 7.28 (s, 2H), 7.53 (m, 2H); <sup>13</sup>C NMR (CD<sub>3</sub>OD, 150 MHz)  $\delta$  13.8, 20.1, 39.7, 121.1, 124.9, 129.6, 139.7, 174.4; HRESIMS calcd for C<sub>10</sub>H<sub>14</sub>NO [M+H]<sup>+</sup> 164.1075, found 164.1054.

## $^1\text{H}$ and $^{13}\text{C}$ NMR spectra of isolated compounds

In  $^1\text{H}$  NMR spectra, peaks at  $\delta$  3.31 and 4.90 correspond to trace amount of protonated solvent in  $\text{CD}_3\text{OD}$  and peaks at  $\delta$  2.50 and 3.34 correspond to trace amount of protonated solvent in  $\text{DMSO-d}_6$ .

### 1. *N*-Acetylaniline in $\text{CDCl}_3$ (Table 2, entry 1)

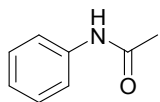

#### $^1\text{H}$ NMR

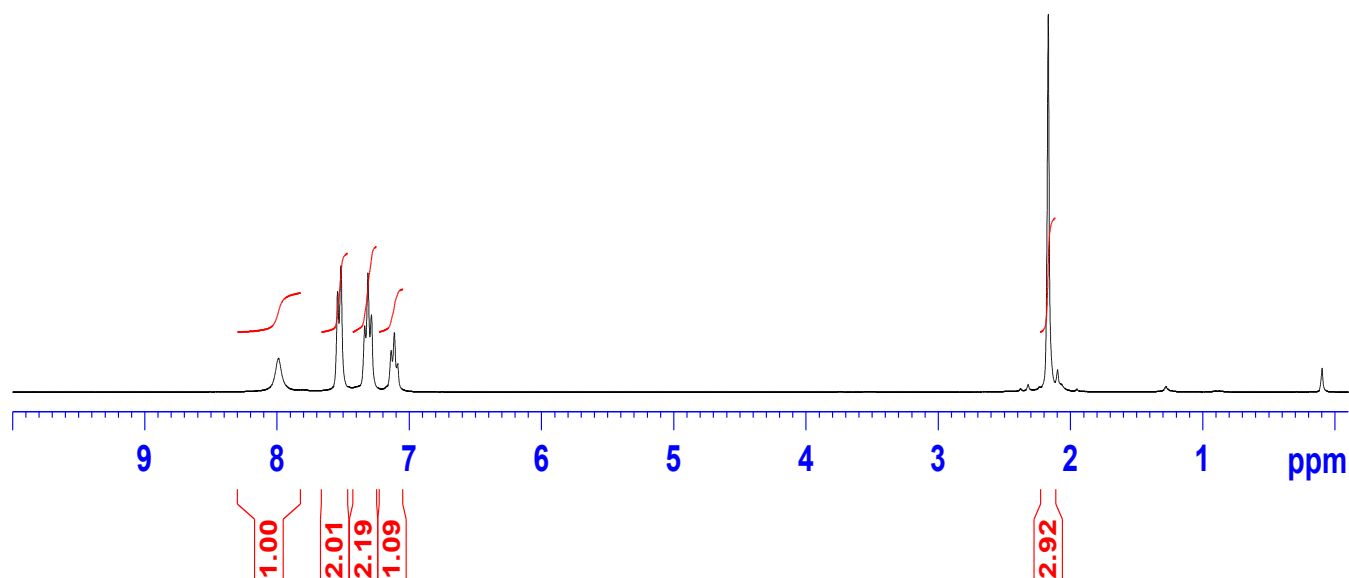

#### $^{13}\text{C}$ NMR

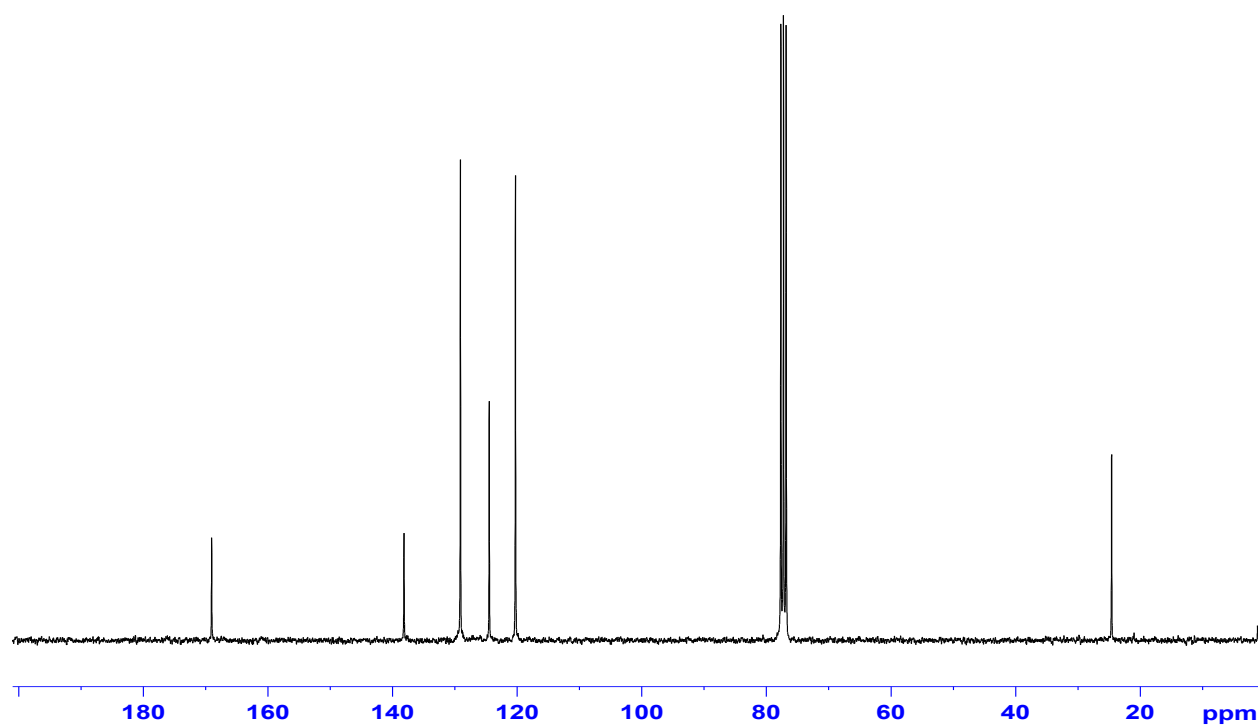

2. *N*-Acetyl-4-fluoroaniline in CD<sub>3</sub>OD (Table 2, entry 2)

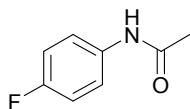

<sup>1</sup>H NMR

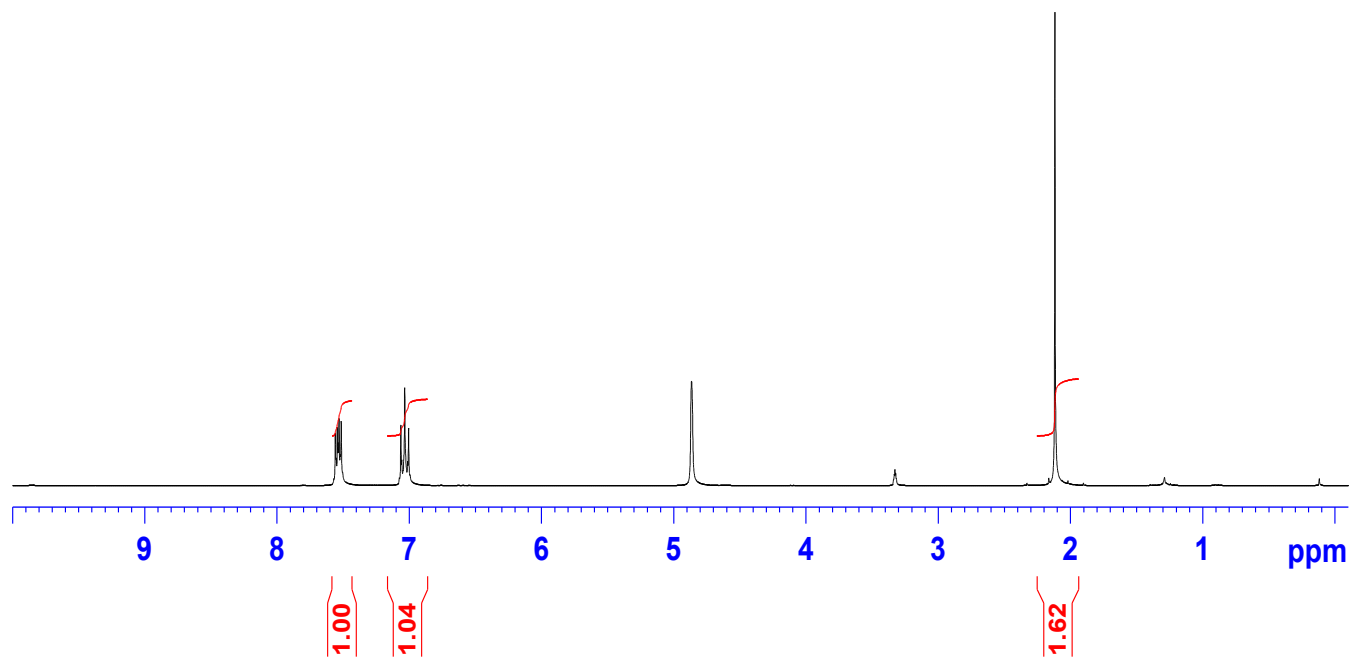

<sup>13</sup>C NMR

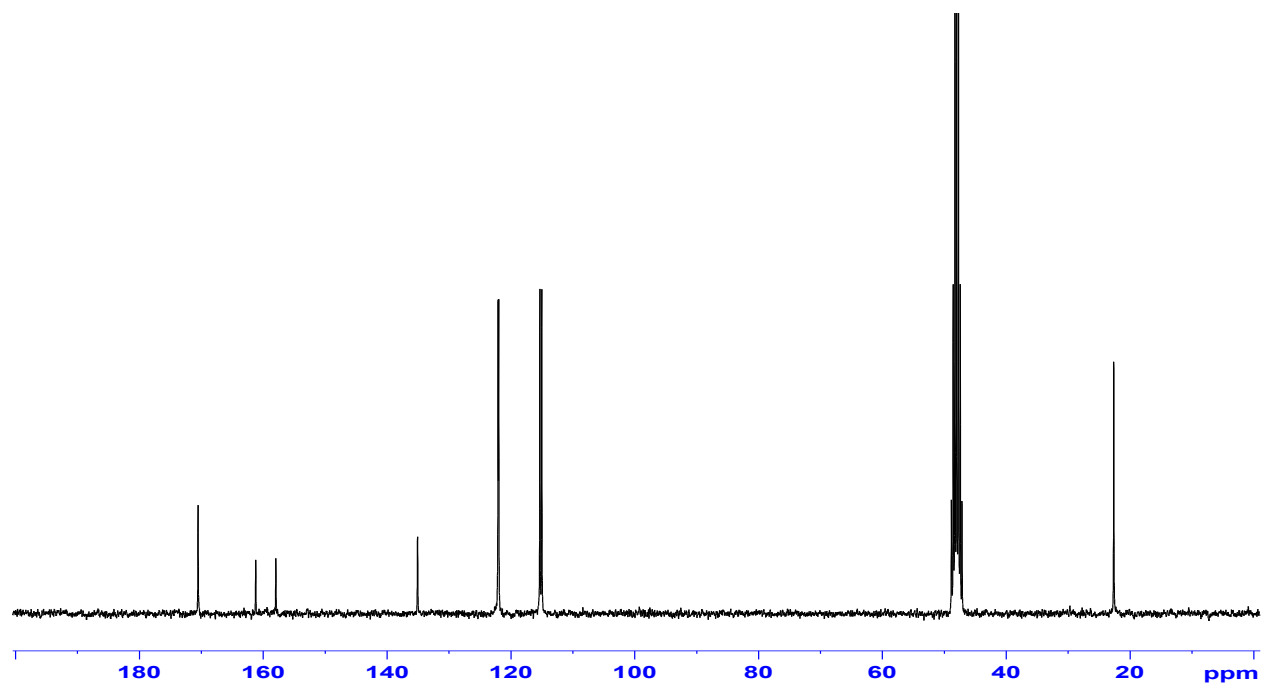

3. *N*-Acetyl-4-chloroaniline in CD<sub>3</sub>OD (Table 2, entry 3)

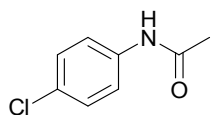

<sup>1</sup>H NMR

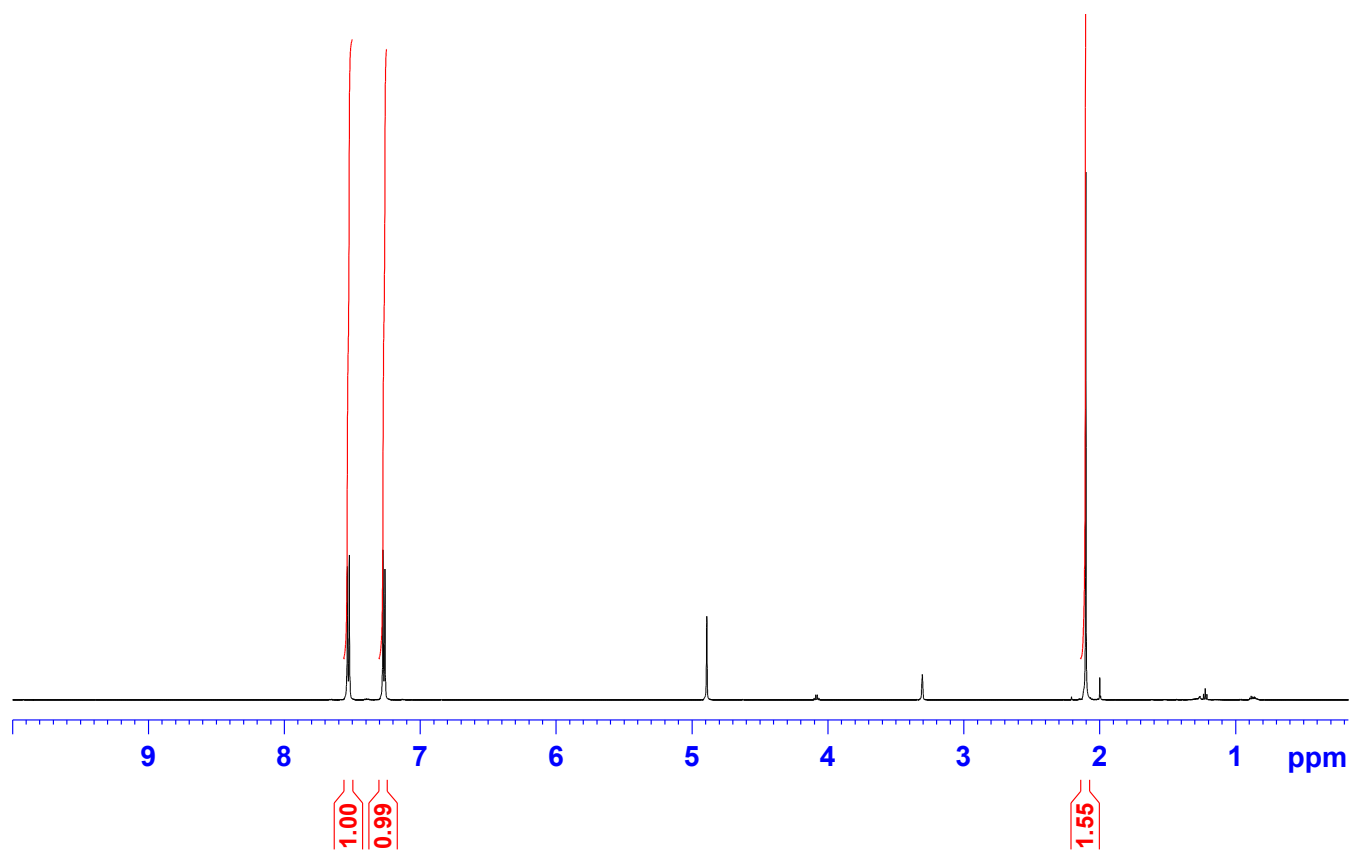

<sup>13</sup>C NMR

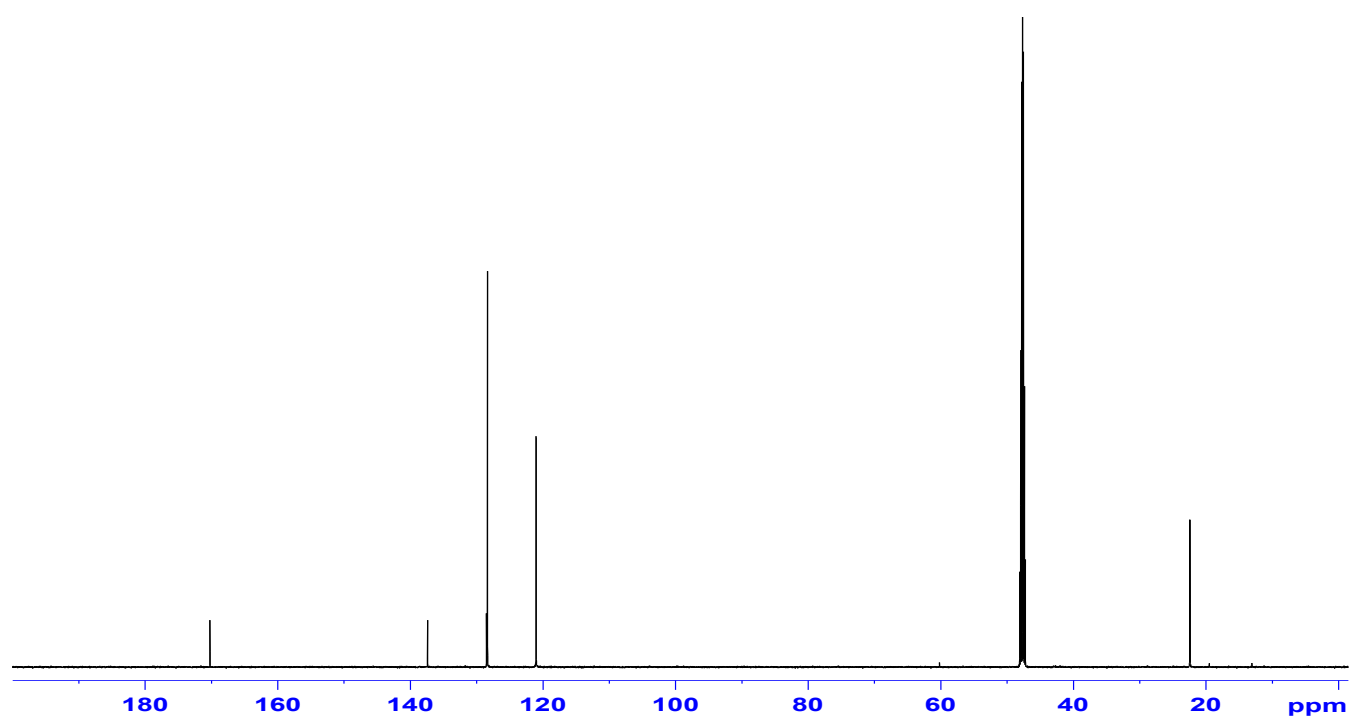

4. *N*-Acetyl-4-bromoaniline in CD<sub>3</sub>OD (Table 2, entry 4)

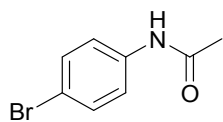

<sup>1</sup>H NMR

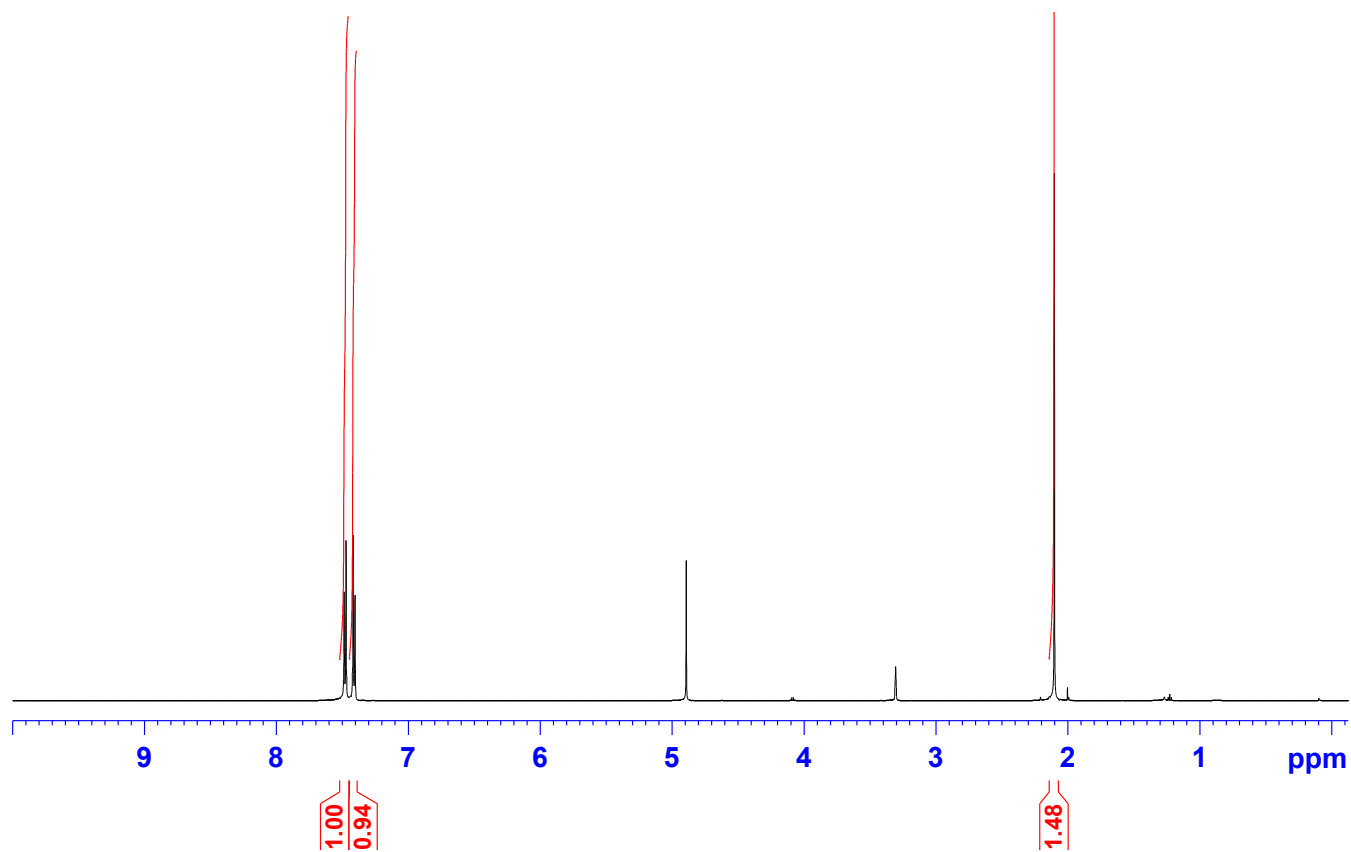

<sup>13</sup>C NMR

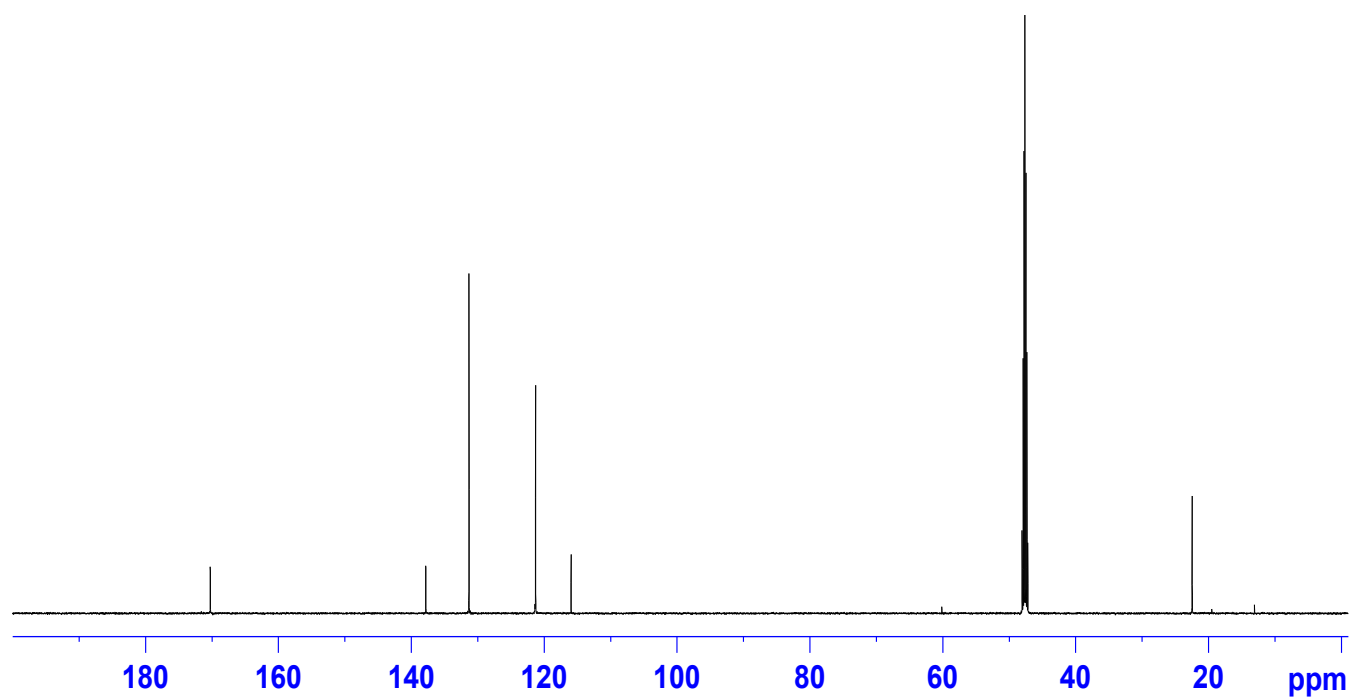

5. 4-(*N*-Acetylamino)toluene in CD<sub>3</sub>OD (Table 2, entry 5)

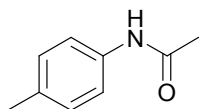

<sup>1</sup>H NMR

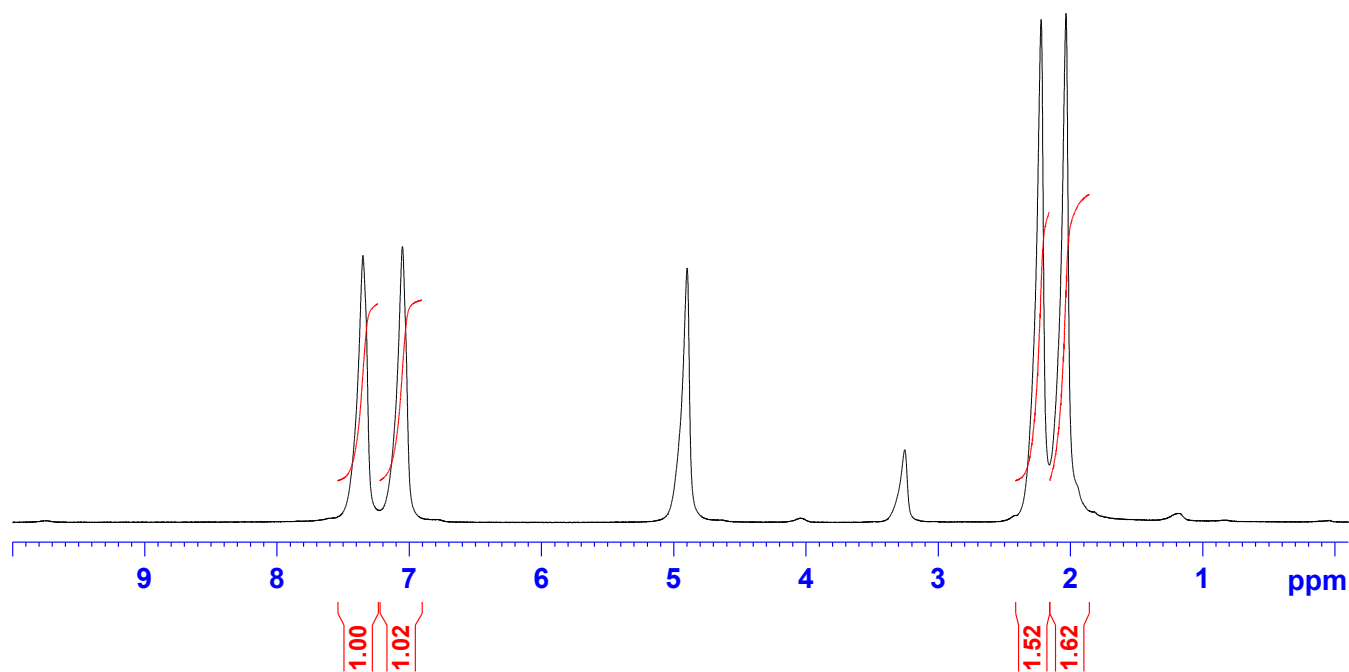

<sup>13</sup>C NMR

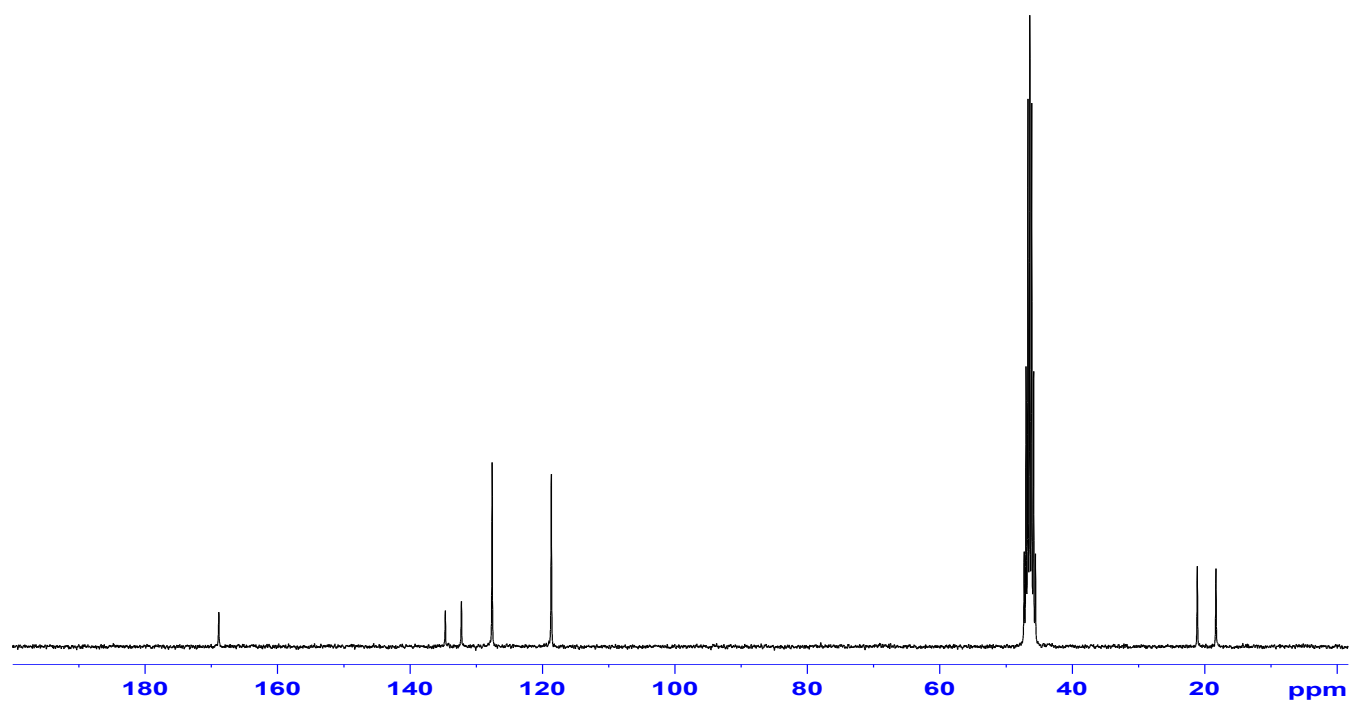

6. 4-(*N*-Acetylamino)phenol in CD<sub>3</sub>OD (Table 2, entry 6)

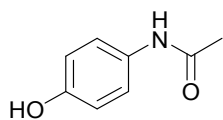

<sup>1</sup>H NMR

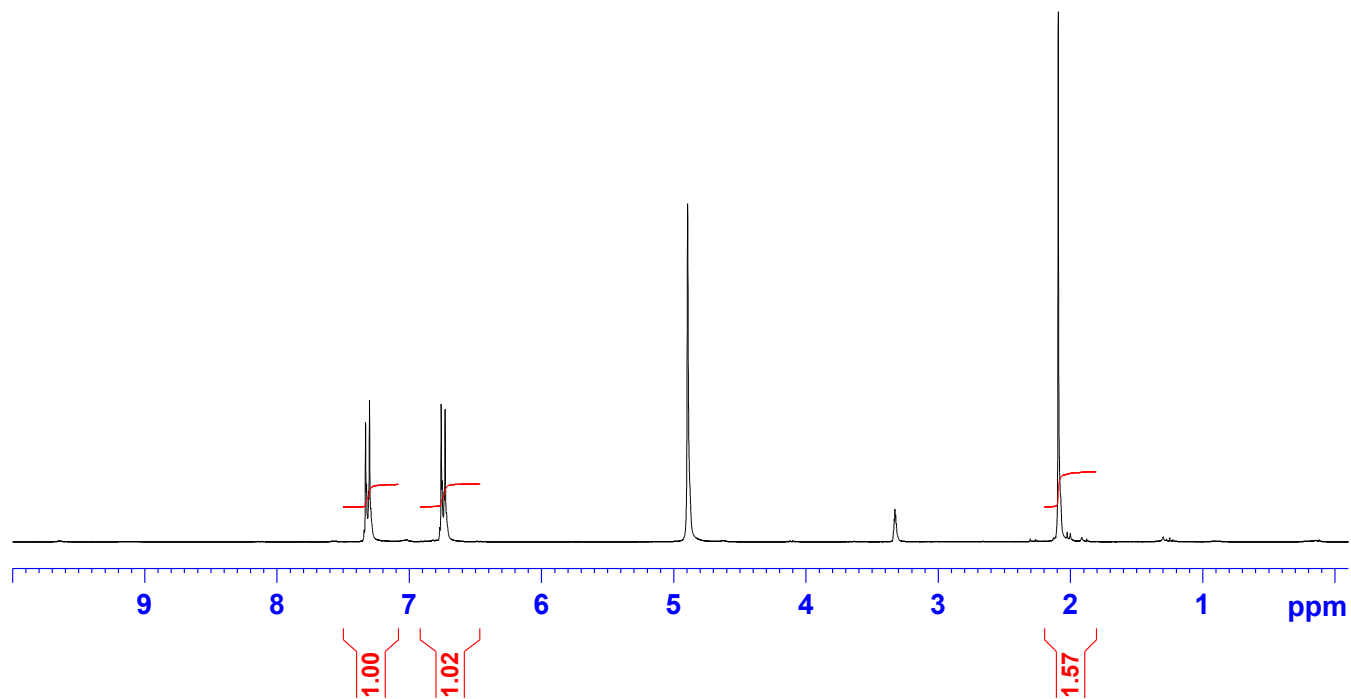

<sup>13</sup>C NMR

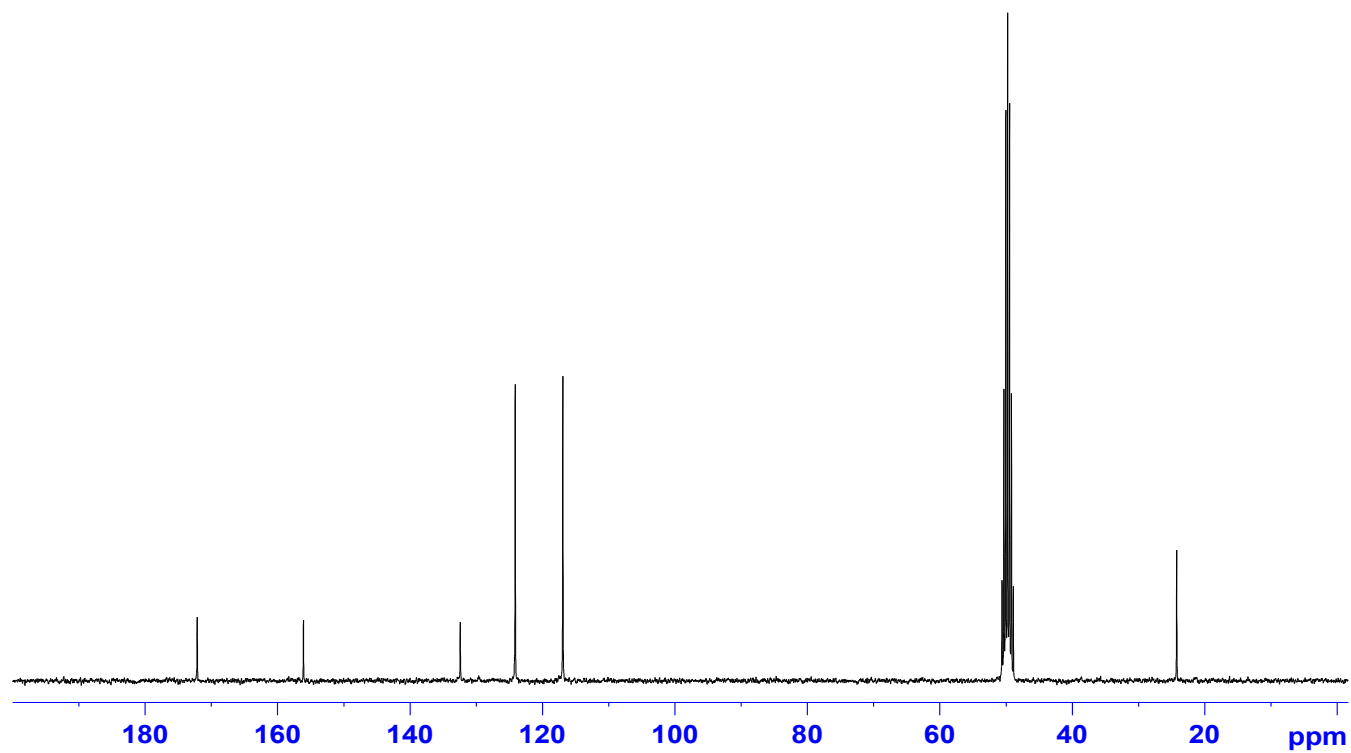



7. Methyl-3-(*N*-acetylamino)benzoate in CD<sub>3</sub>OD (Table 2, entry 7)

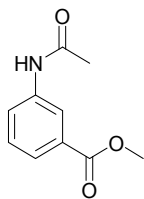

<sup>1</sup>H NMR

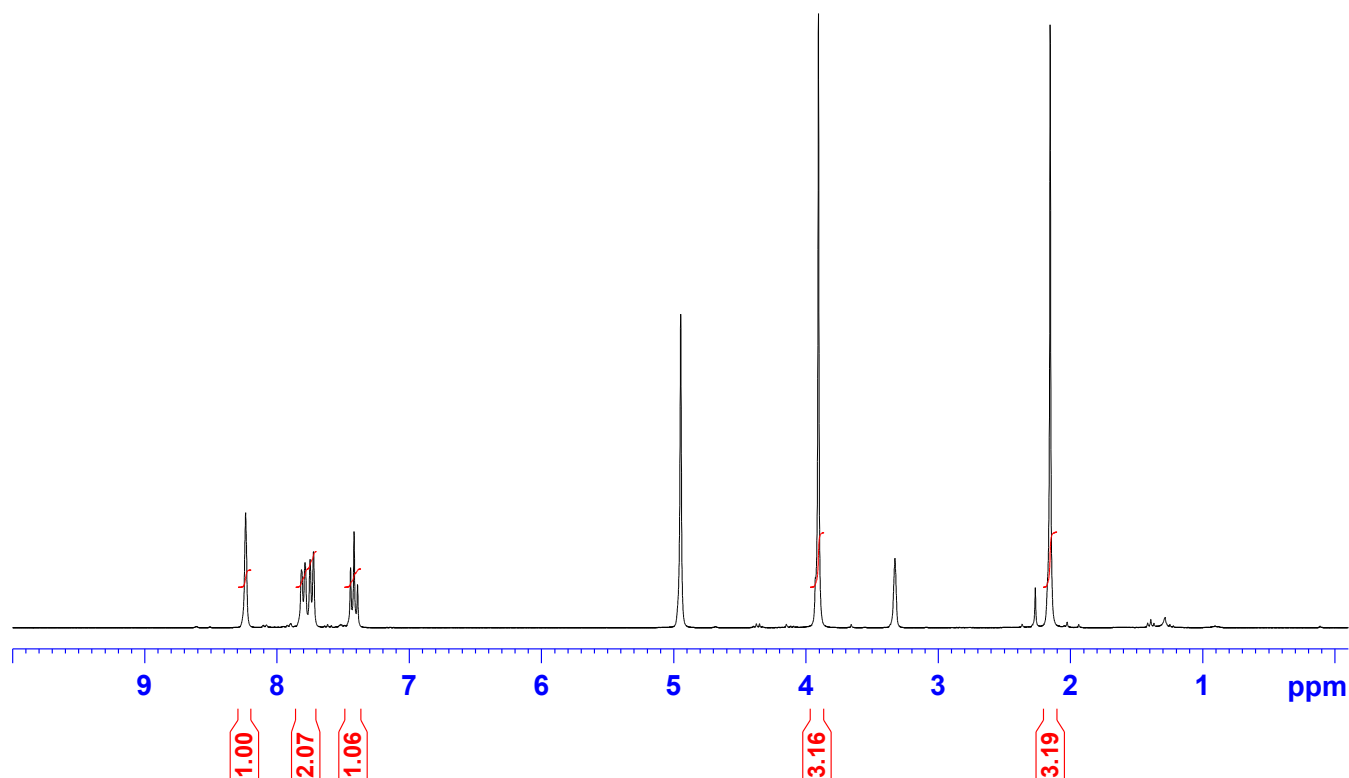

<sup>13</sup>C NMR

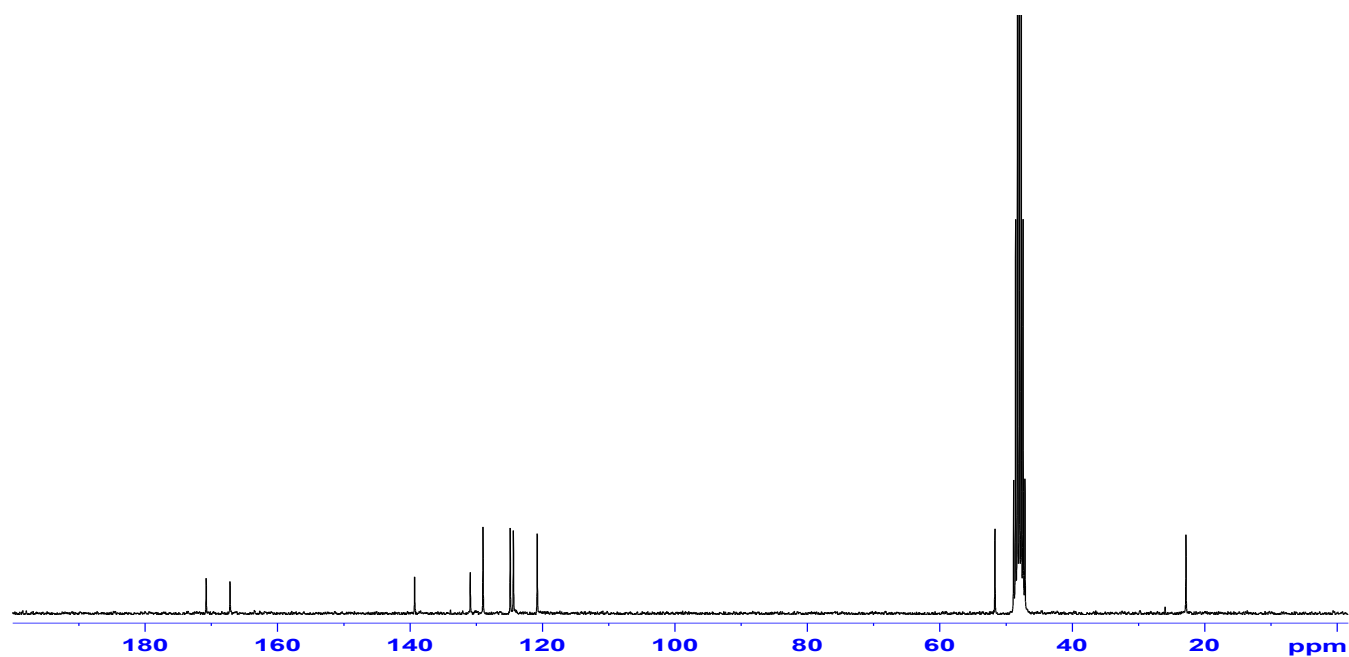

8. 3-(*N*-Acetylamino)benzonitrile in CD<sub>3</sub>OD (Table 2, entry 8)

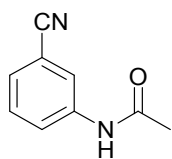

<sup>1</sup>H NMR

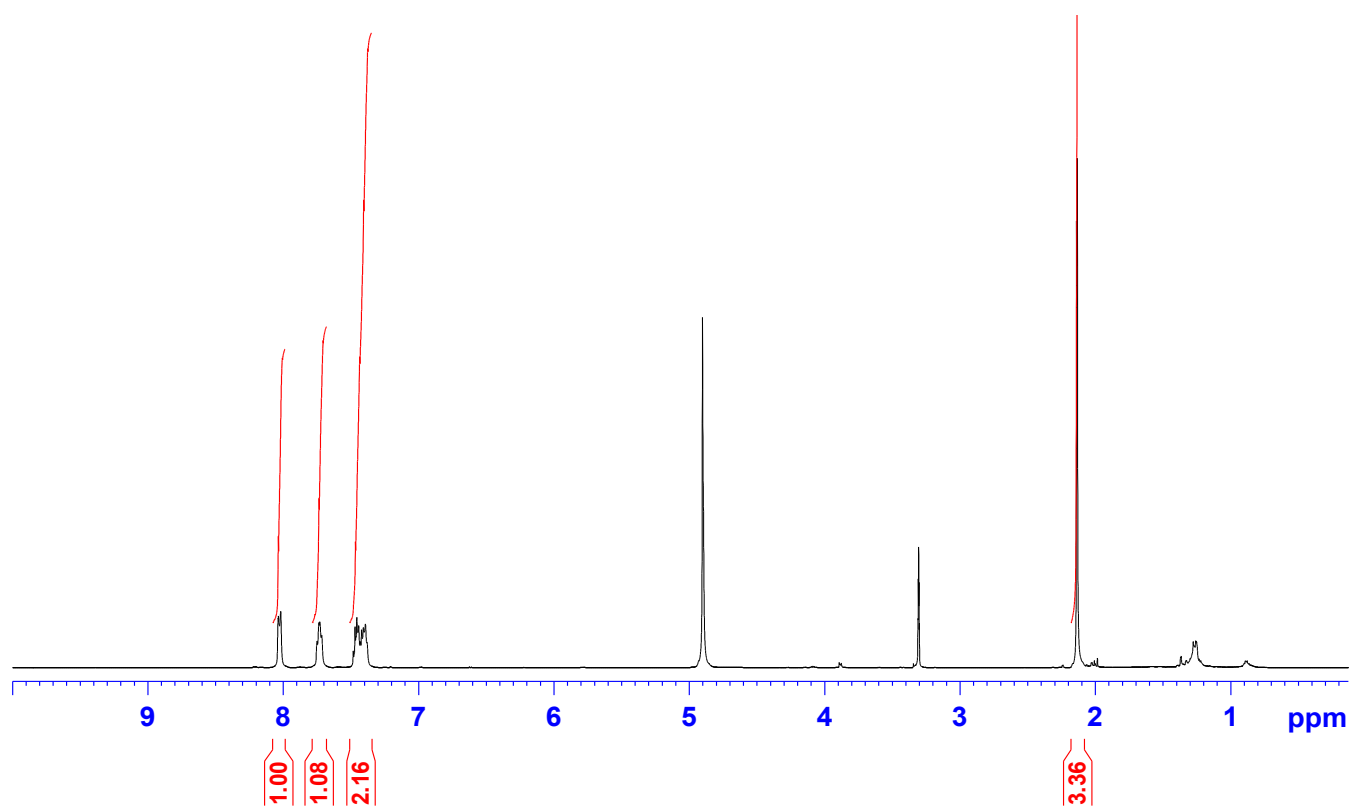

<sup>13</sup>C NMR

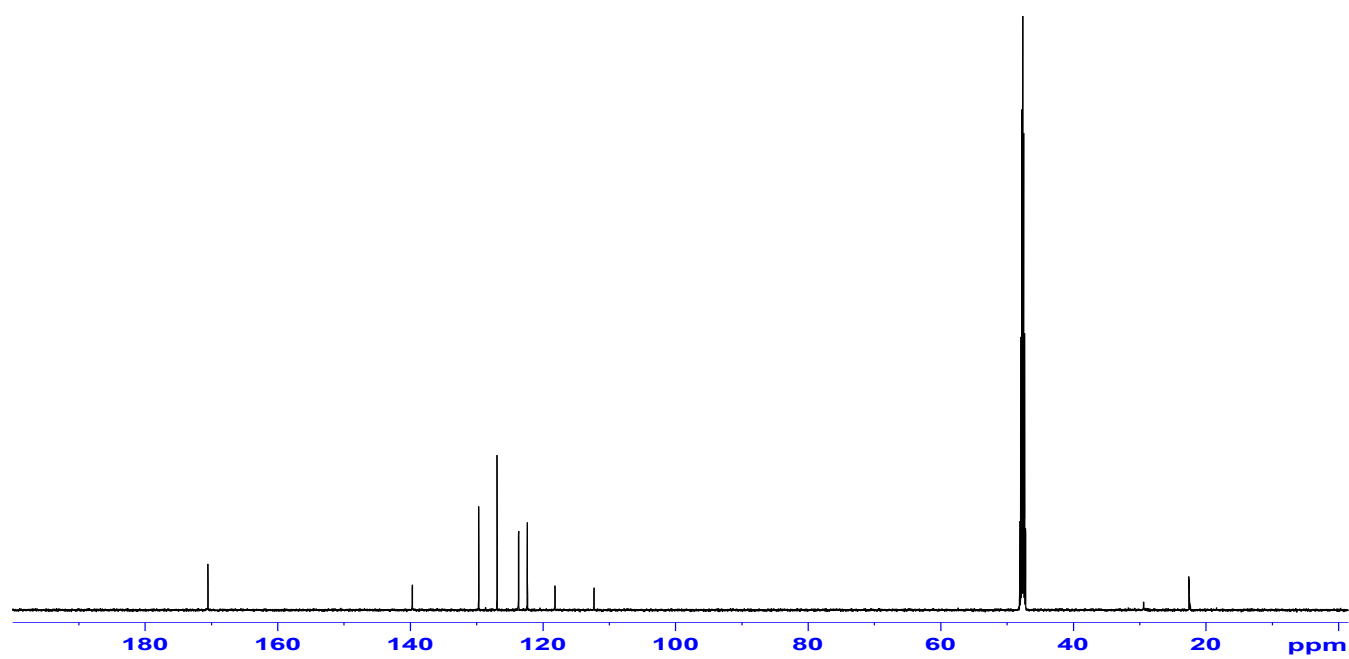

9. 4-(*N*-Acetylamino)acetophenone in CD<sub>3</sub>OD (Table 2, entry 9)

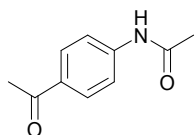

<sup>1</sup>H NMR

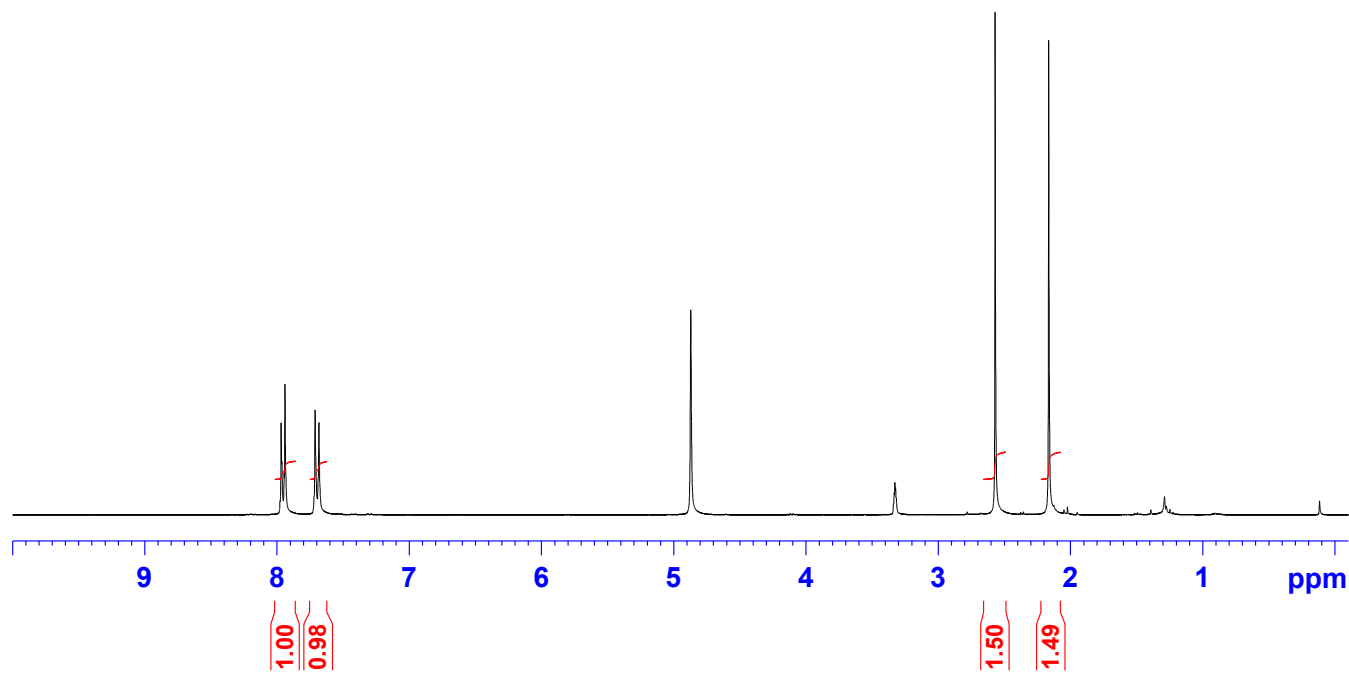

<sup>13</sup>C NMR

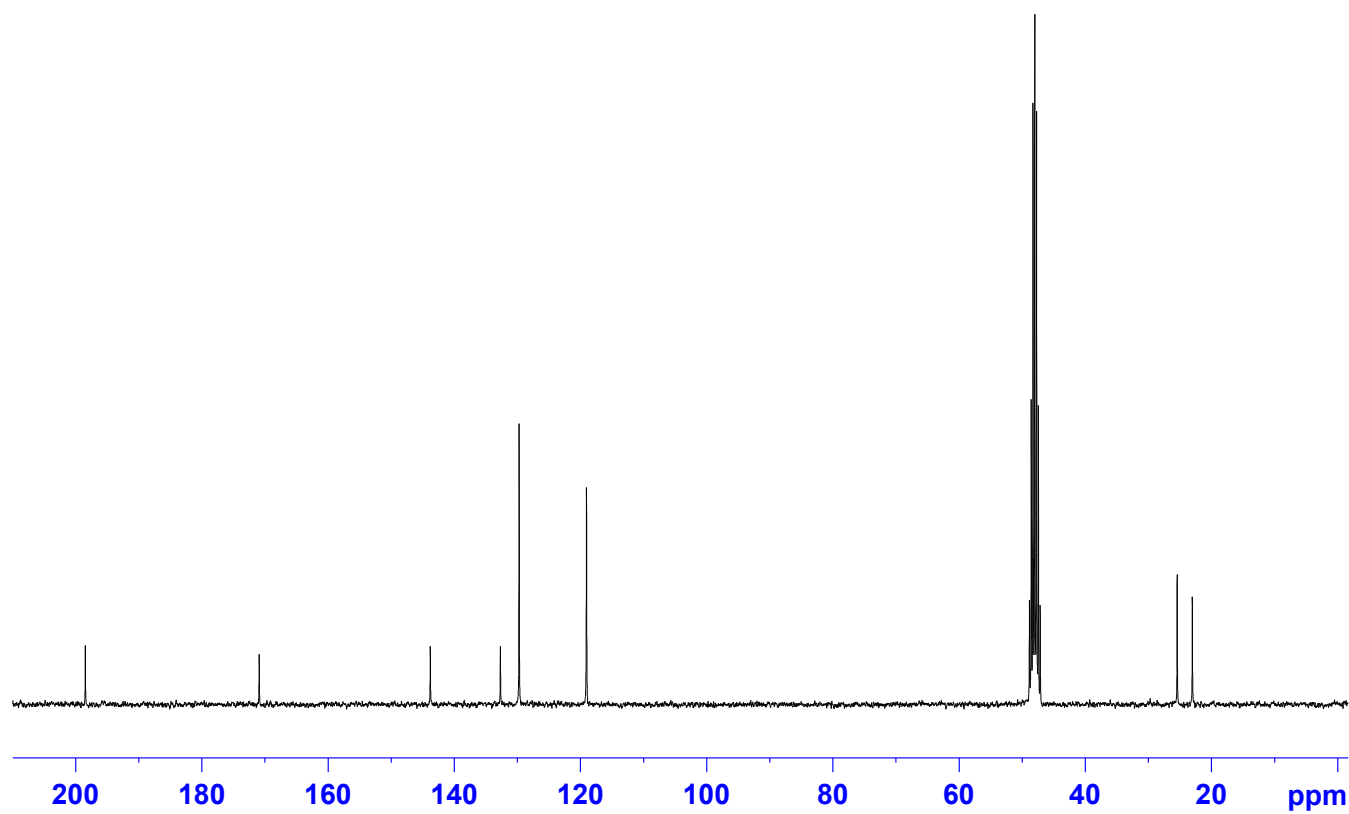

10. 1,4-Di-(*N*-acetylamino)benzene in DMSO-d<sub>6</sub> (Table 2, entry 10)

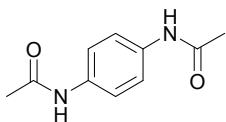

<sup>1</sup>H NMR

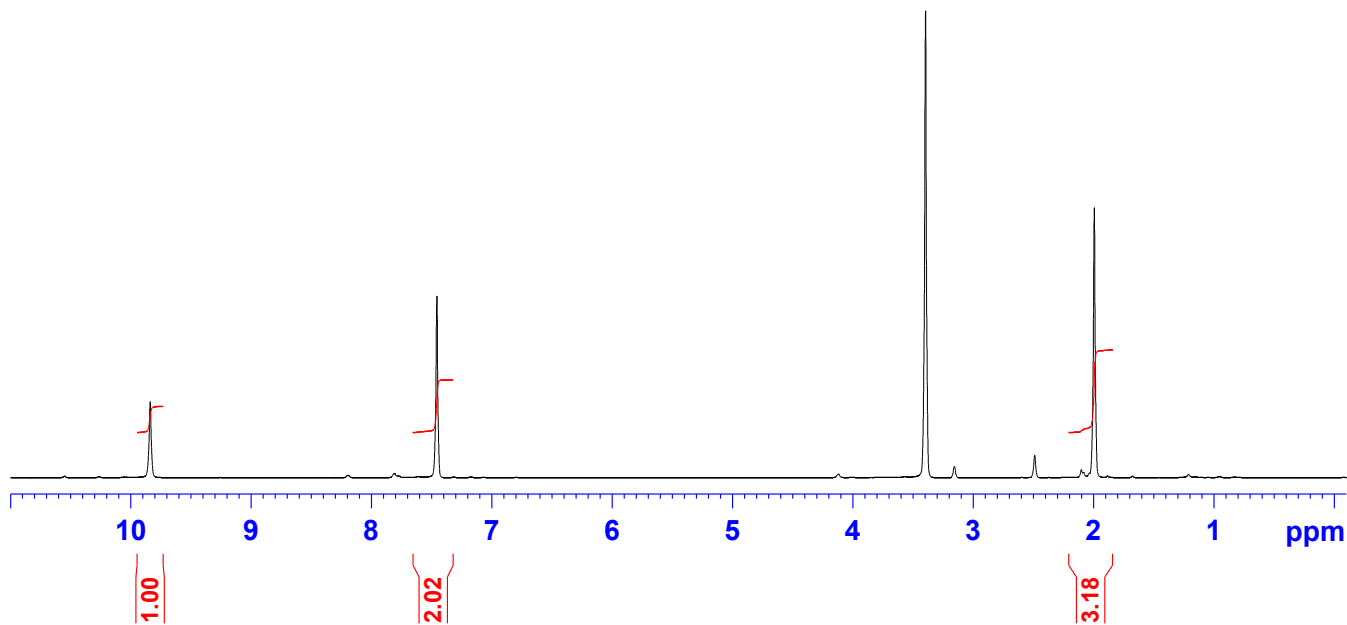

<sup>13</sup>C NMR

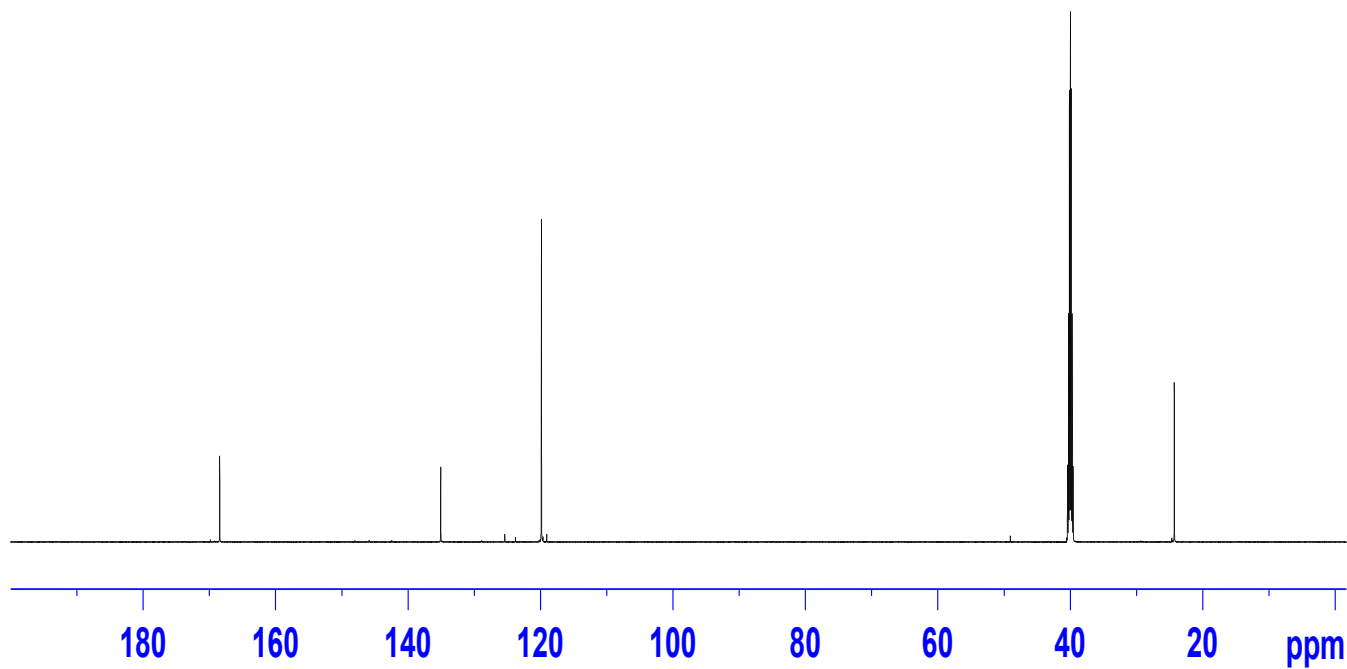

11. 3-(*N*-Acetylamino)styrene in CD<sub>3</sub>OD (Table 2, entry 11)

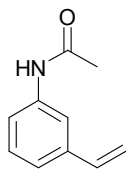

<sup>1</sup>H NMR

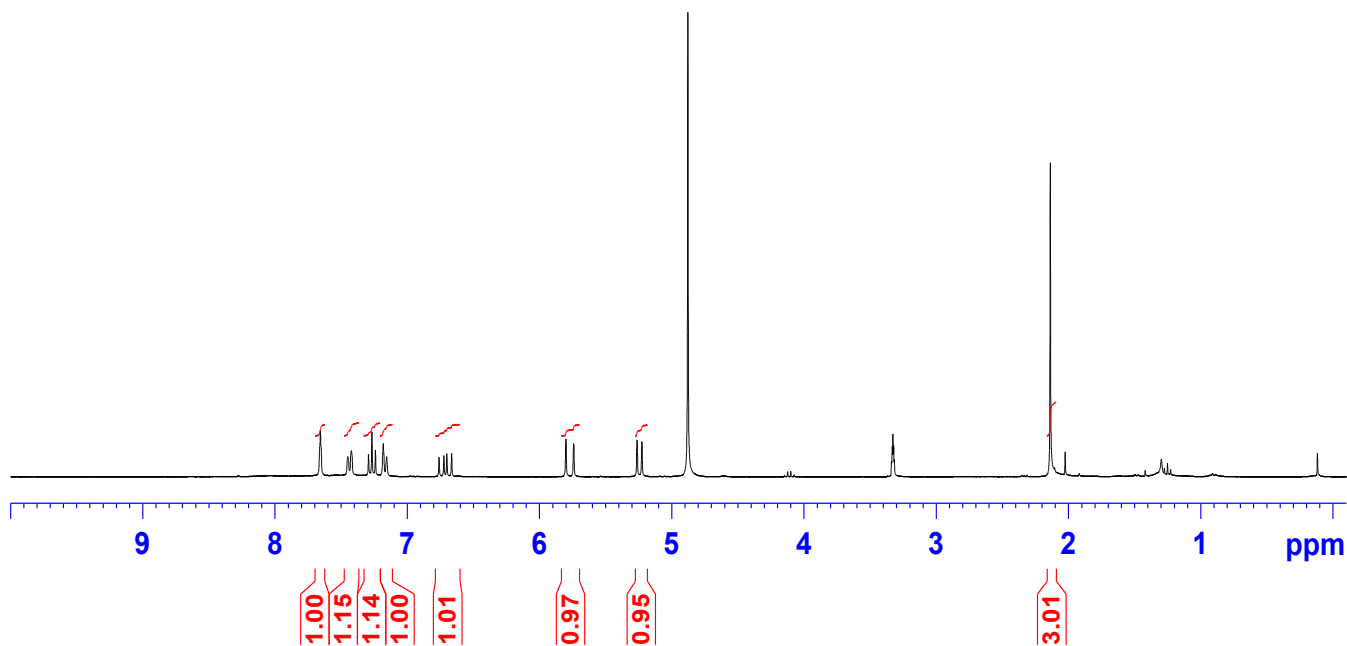

<sup>13</sup>C NMR

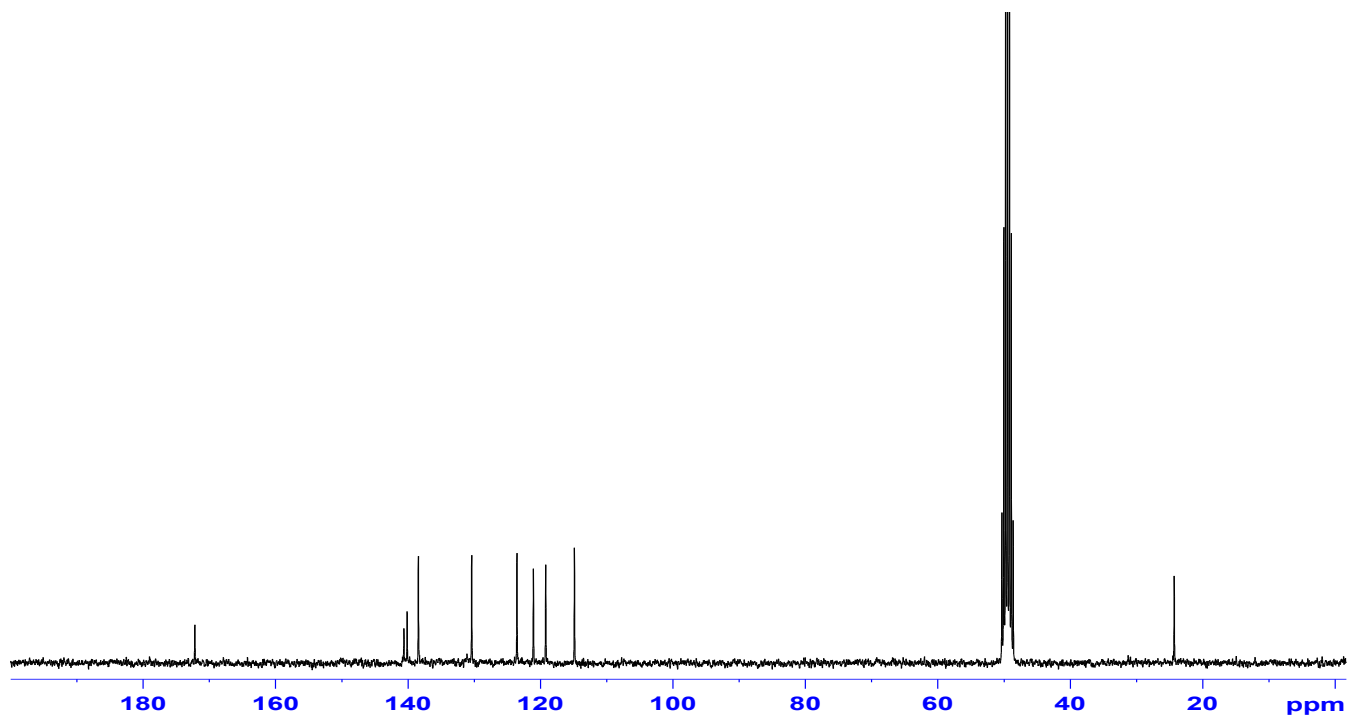

12. *N*-Acetyl-3-nitroaniline in CD<sub>3</sub>OD (Table 2, entry 12)

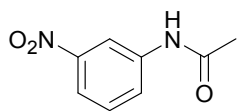

<sup>1</sup>H NMR

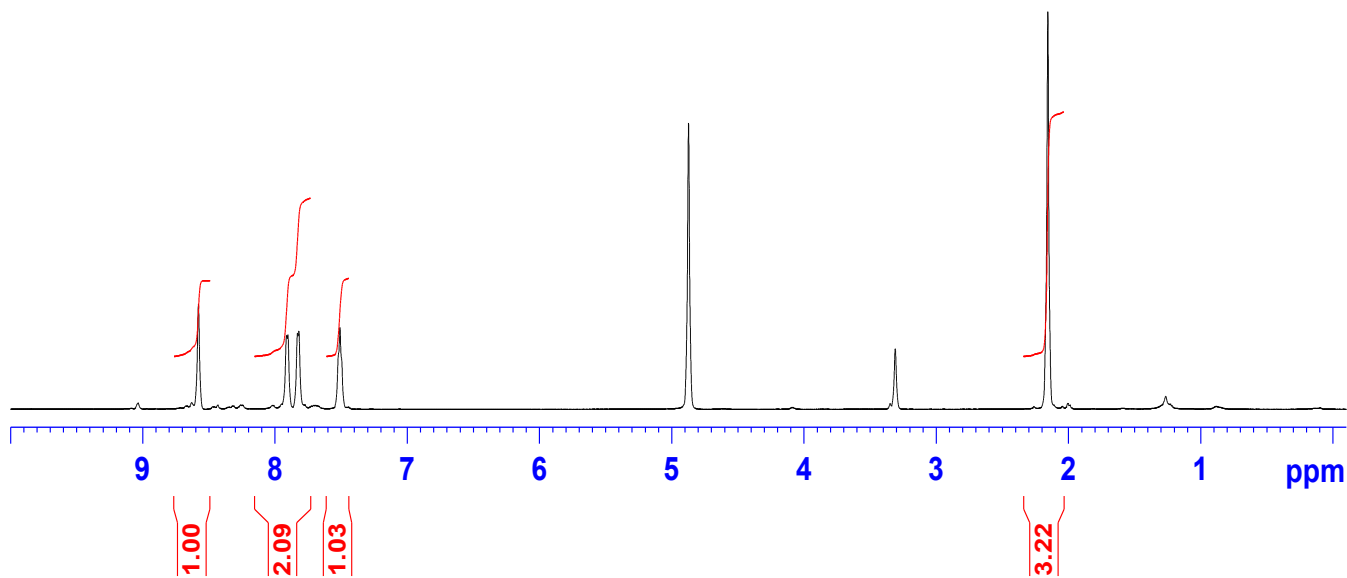

<sup>13</sup>C NMR

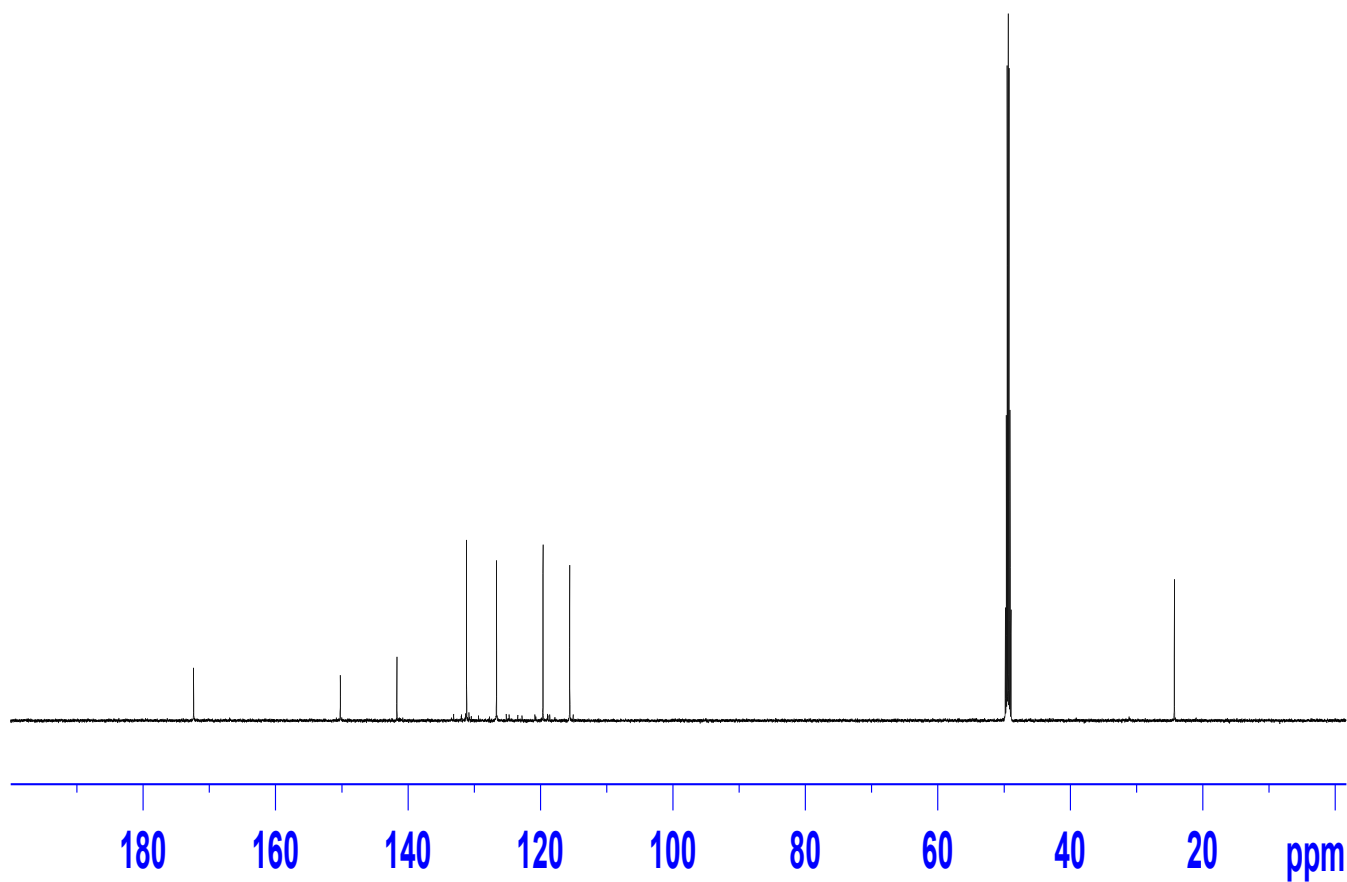

13. 1,4-Di-(*N*-acetylamino)benzene in DMSO- $d_6$  (Table 2, entry 13)

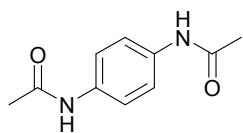

$^1\text{H}$  NMR

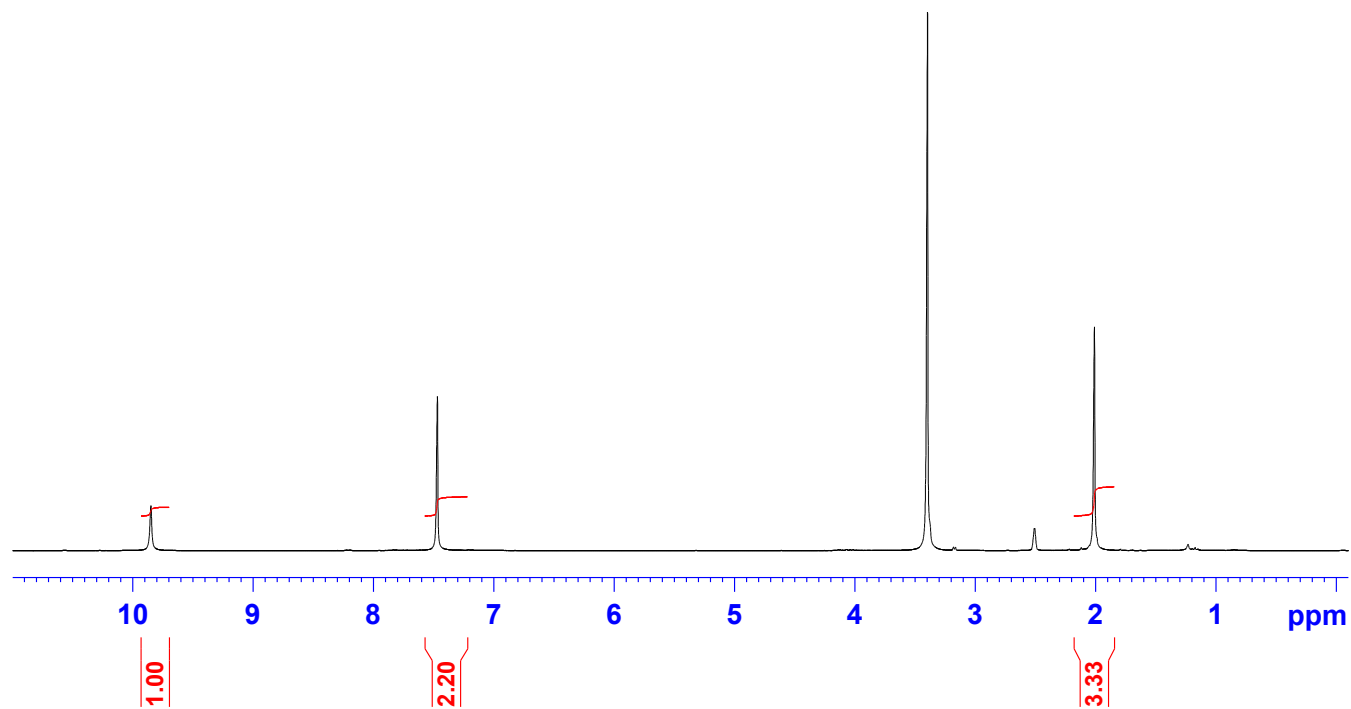

$^{13}\text{C}$  NMR

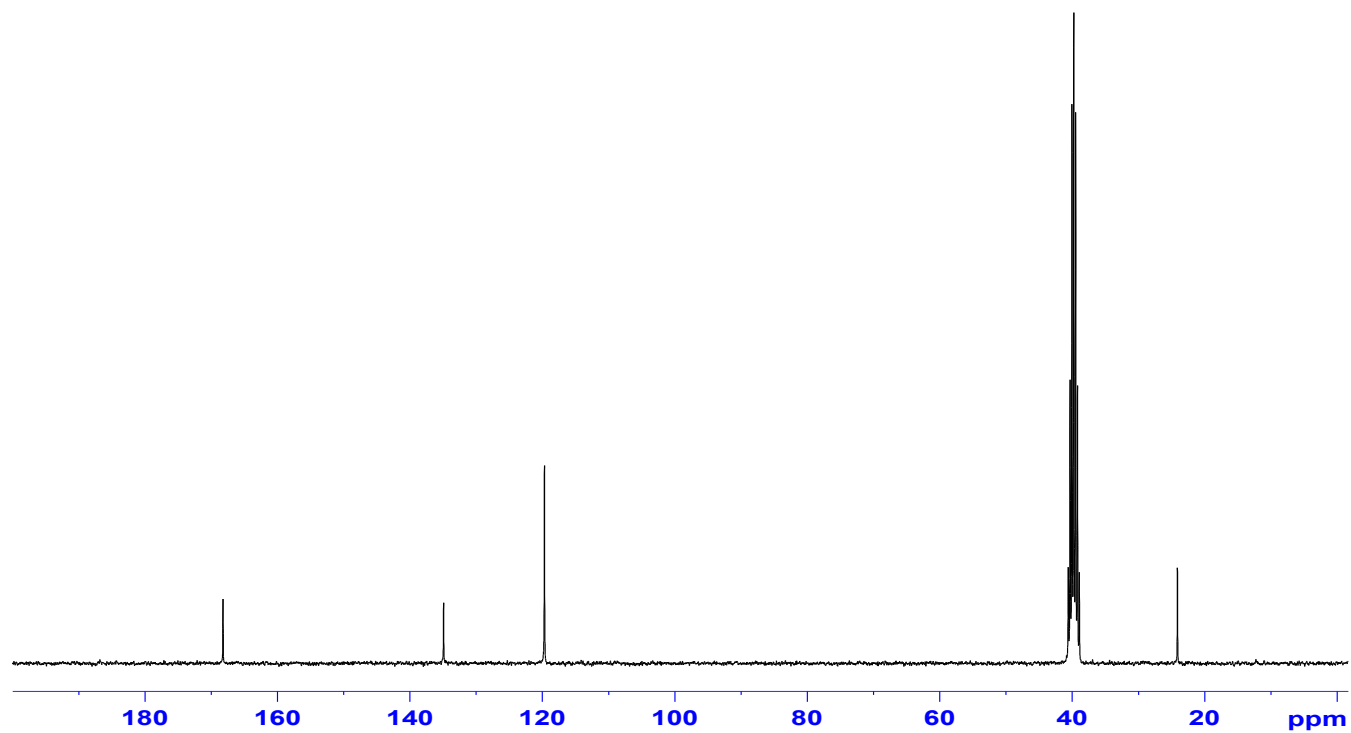

14. 2-(*N*-Acetylamino)fluorine in CD<sub>3</sub>OD (Table 2, entry 14)

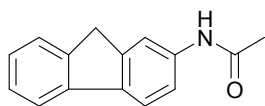

<sup>1</sup>H NMR

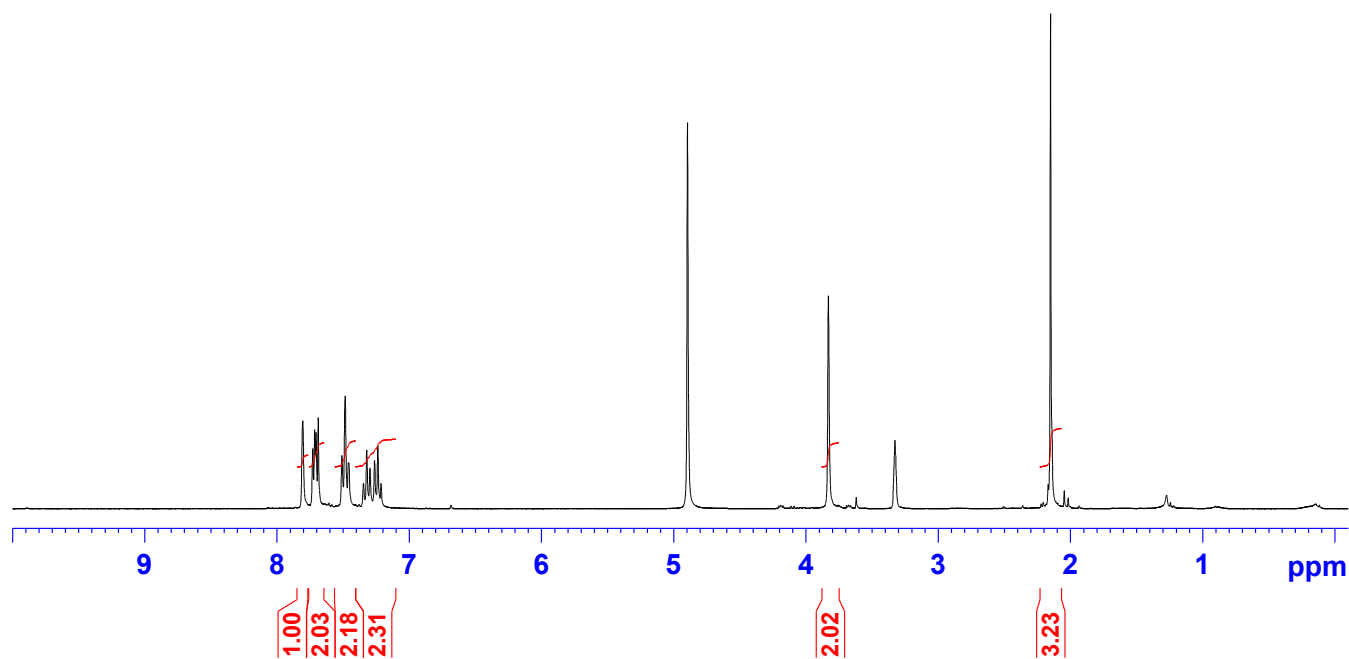

<sup>13</sup>C NMR

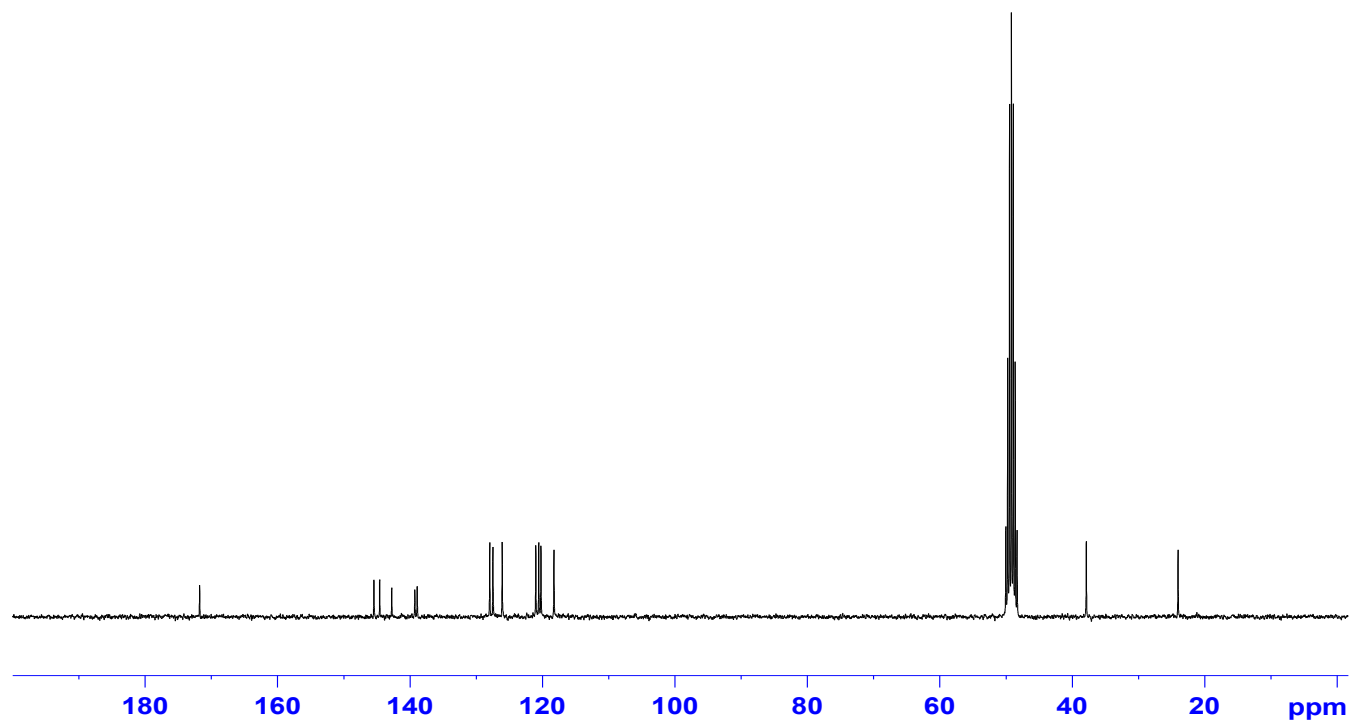



15. 4-(*N*-Acetylamino)phthalide in DMSO- $d_6$  (Table 2, entry 15)

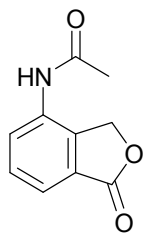

$^1\text{H}$  NMR

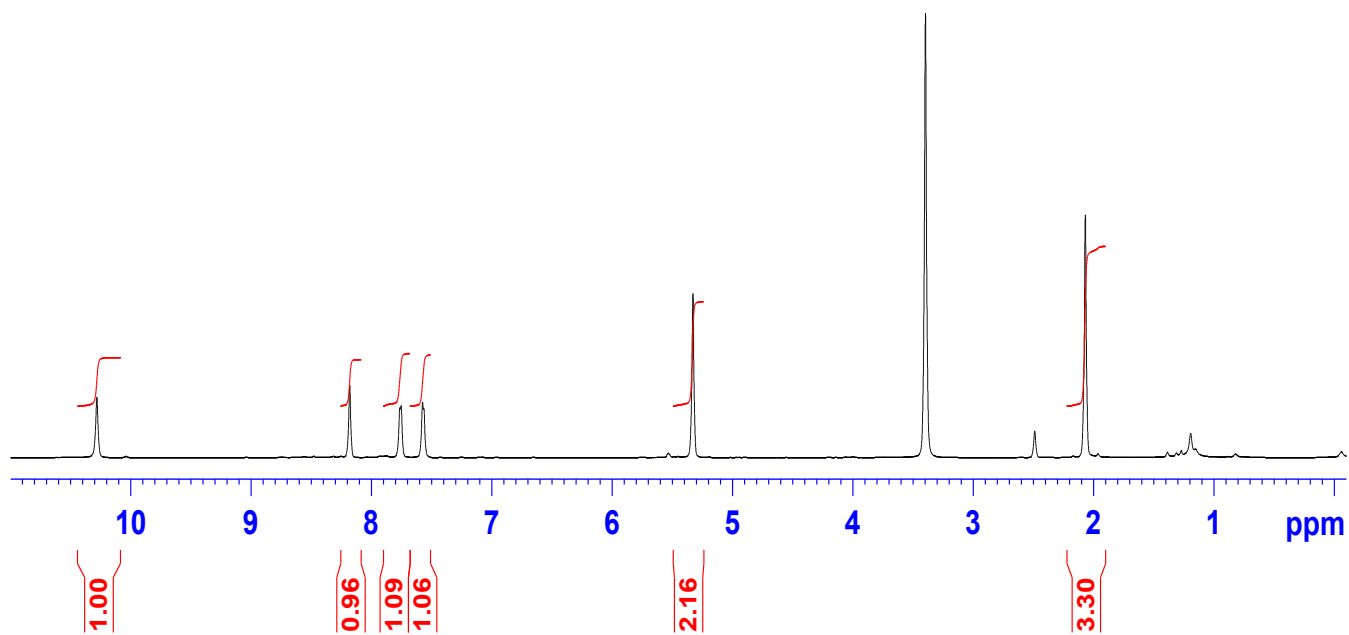

$^{13}\text{C}$  NMR

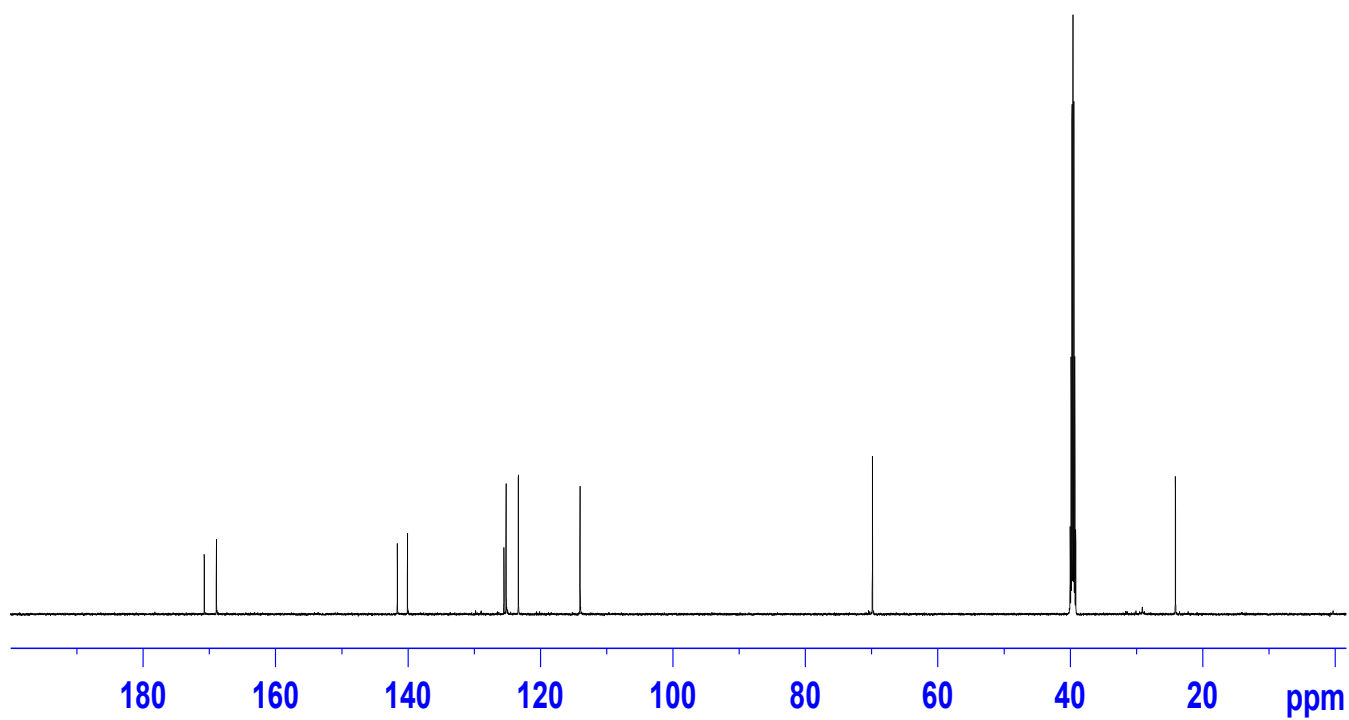

16. 6-(*N*-Acetylamino)benzothiazole in CD<sub>3</sub>OD (Table 2, entry 16)

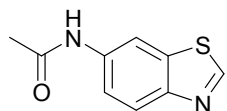

<sup>1</sup>H NMR

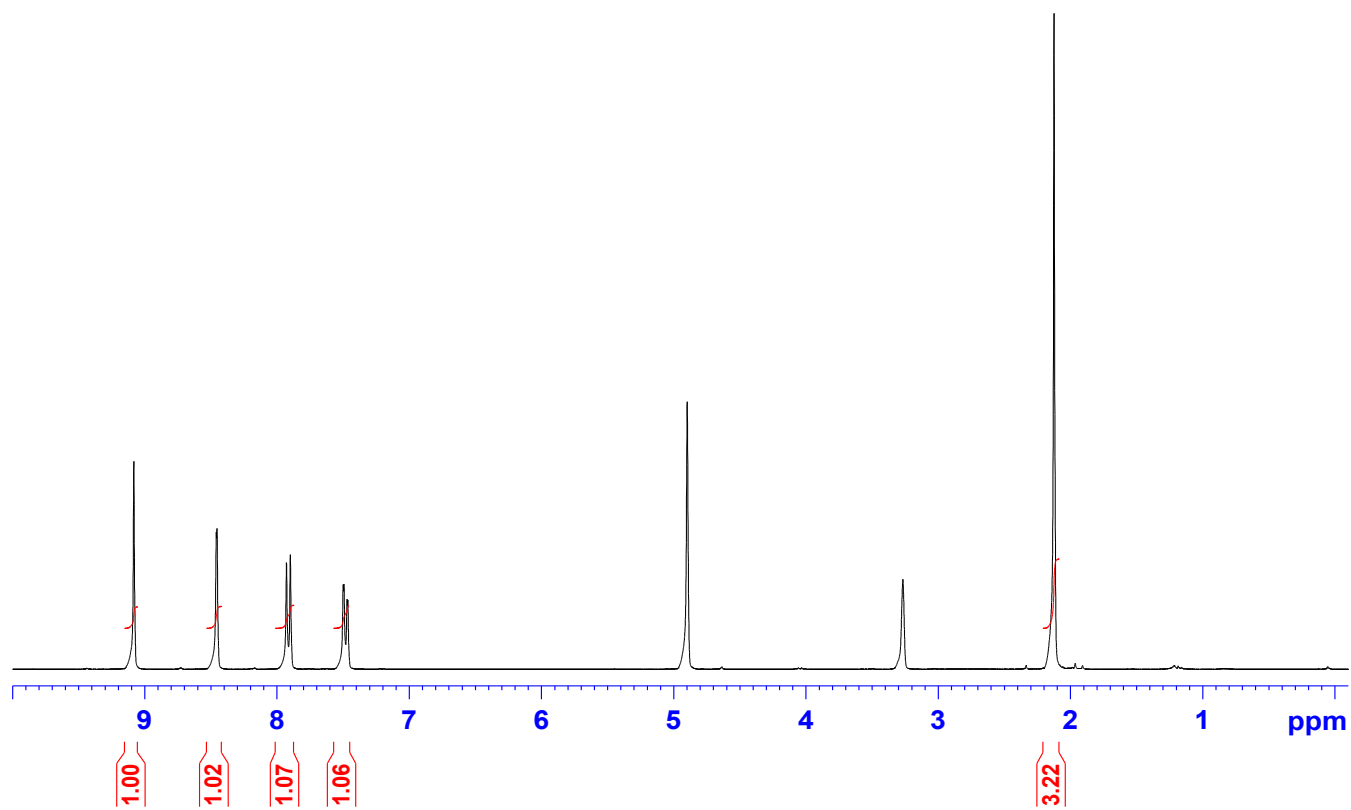

<sup>13</sup>C NMR

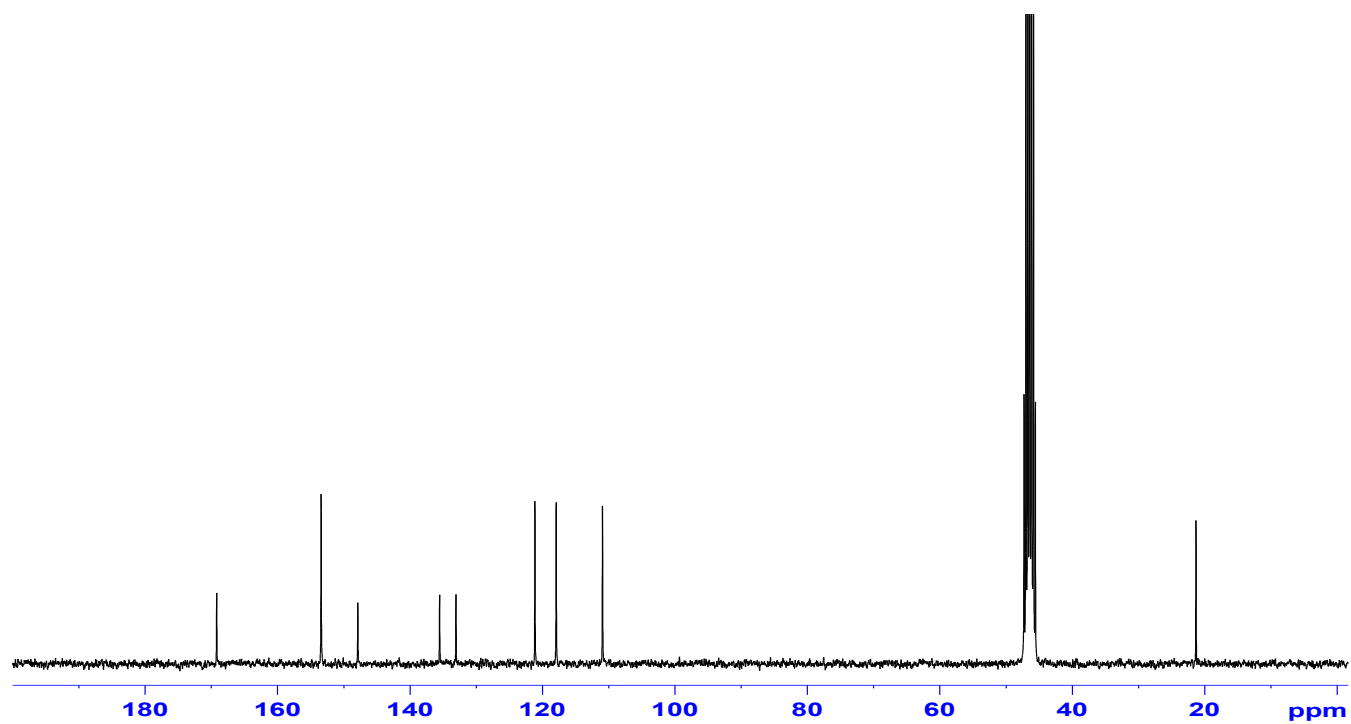

17. 4-(*N*-Acetylamino)-2,1,3-benzothiadiazole in CD<sub>3</sub>OD (Table 2, entry 17)

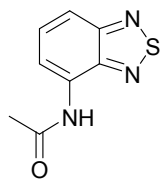

<sup>1</sup>H NMR

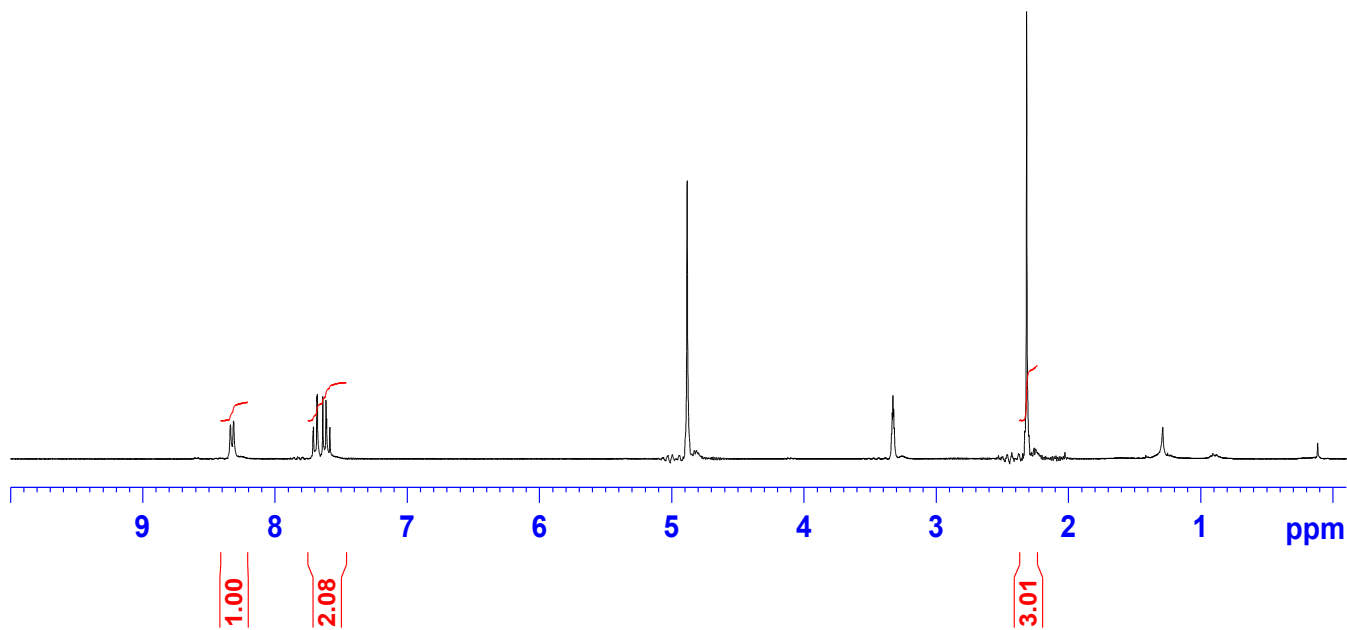

<sup>13</sup>C NMR

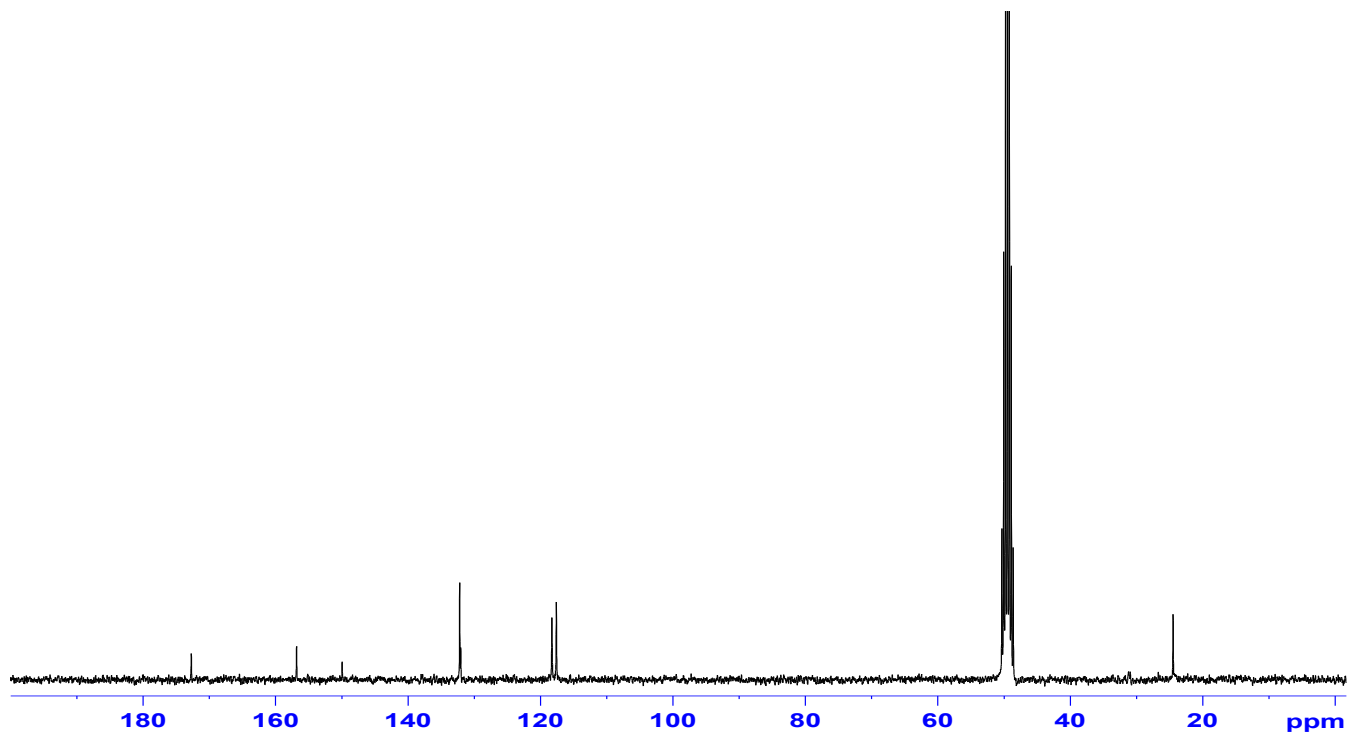

18. 5-(*N*-Acetylamino)isoquinoline in CD<sub>3</sub>OD (Table 2, entry 18)

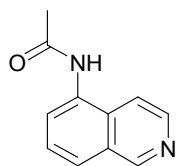

<sup>1</sup>H NMR

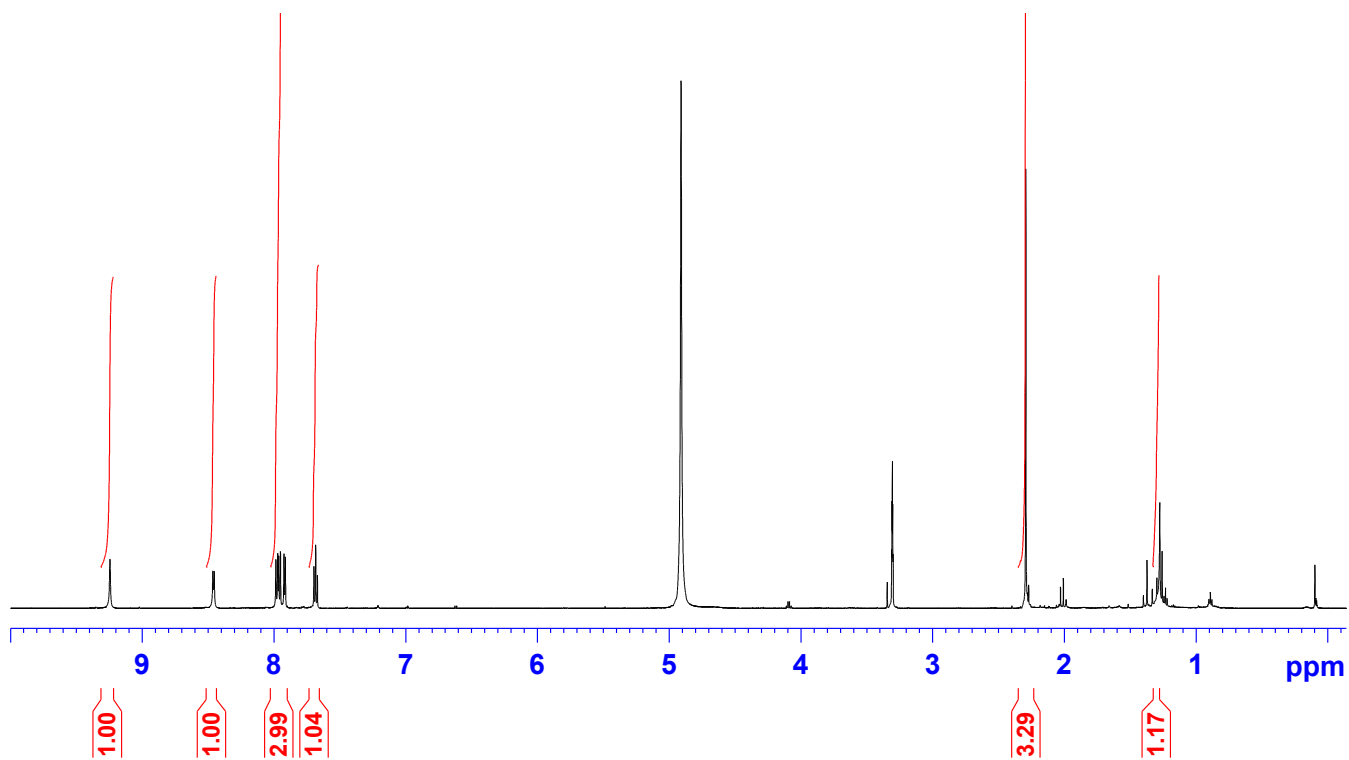

<sup>13</sup>C NMR

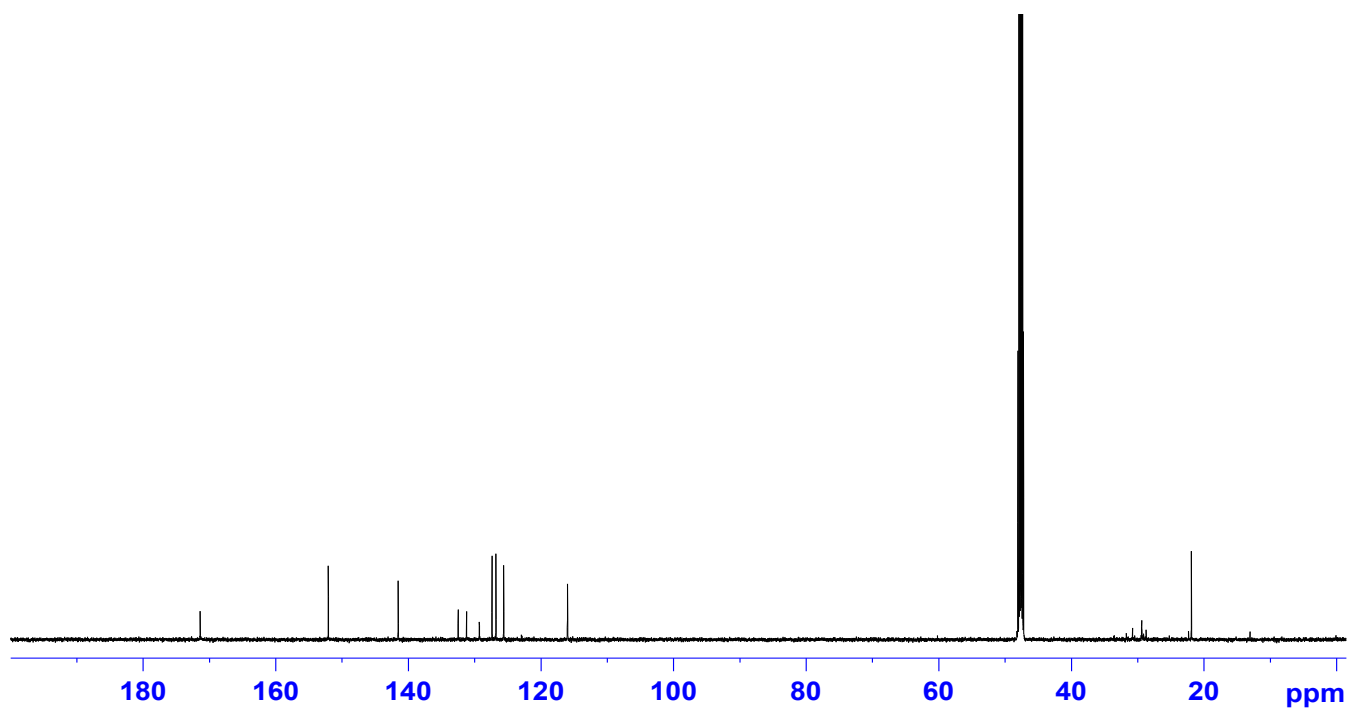

19. 4-(*N*-acetylamino)phthalimide in DMSO- $d_6$  (Table 2, entry 19)

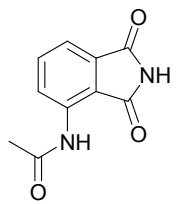

$^1\text{H}$  NMR

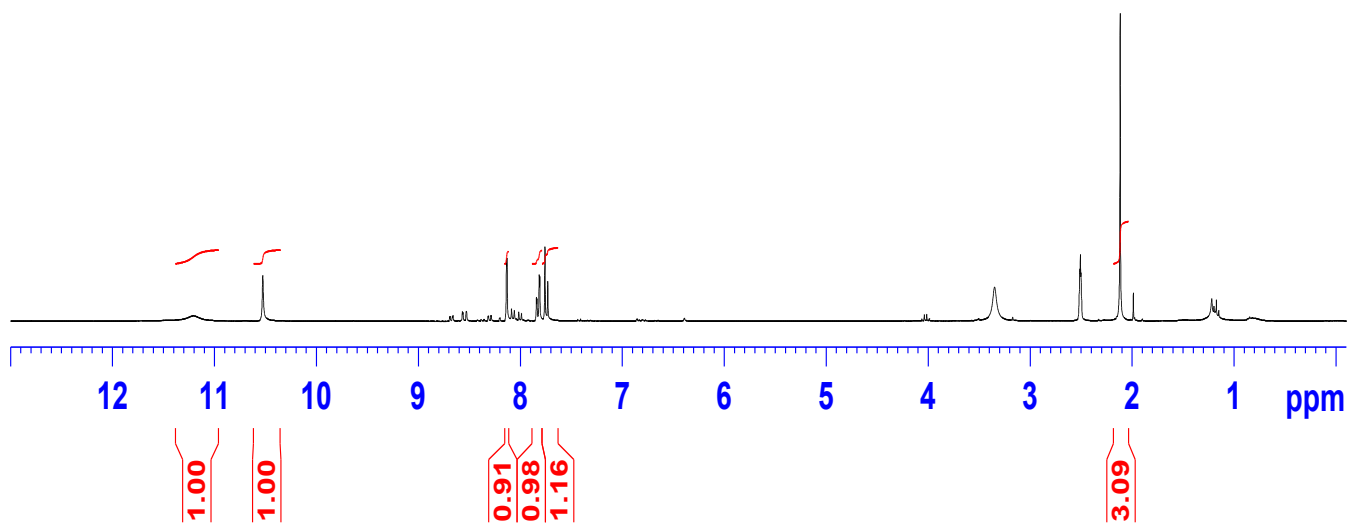

$^{13}\text{C}$  NMR

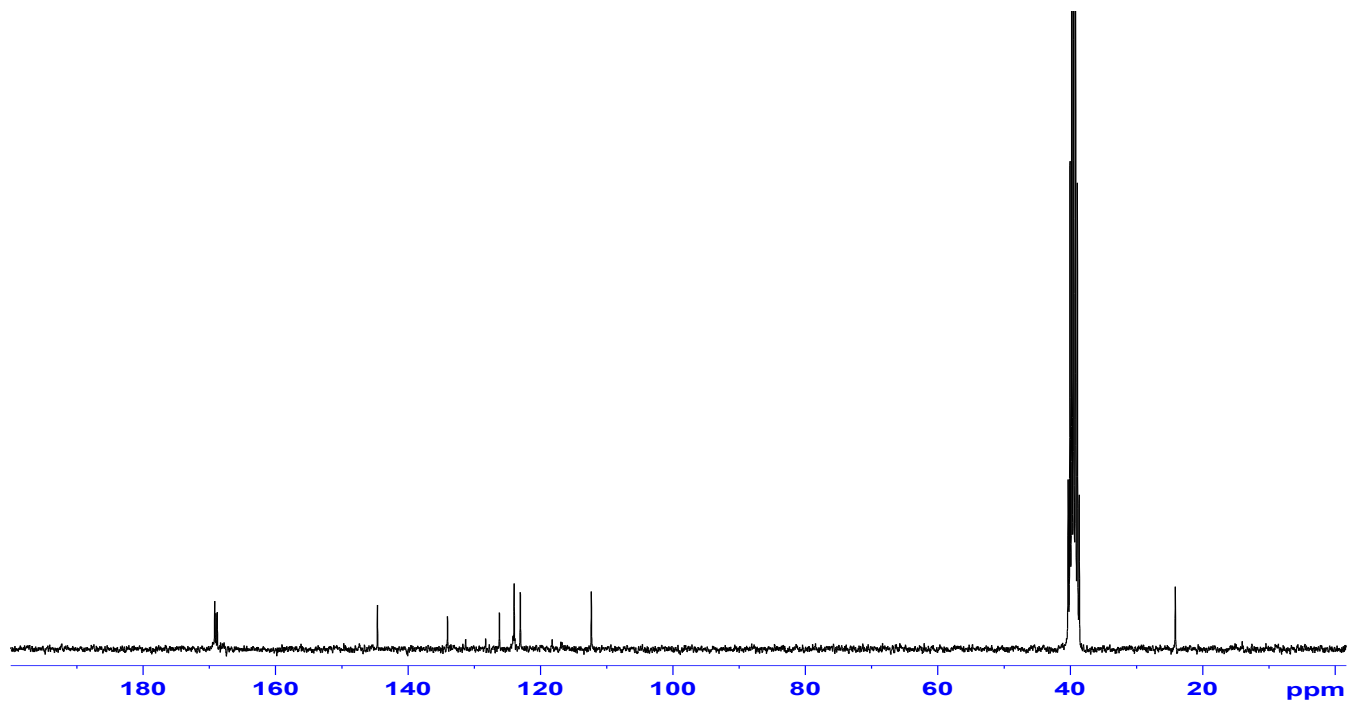

20. 6-(*N*-Acetylamino)chromone in DMSO- $d_6$  (Table 2, entry 20)

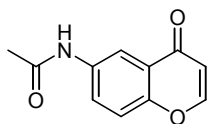

$^1\text{H}$  NMR

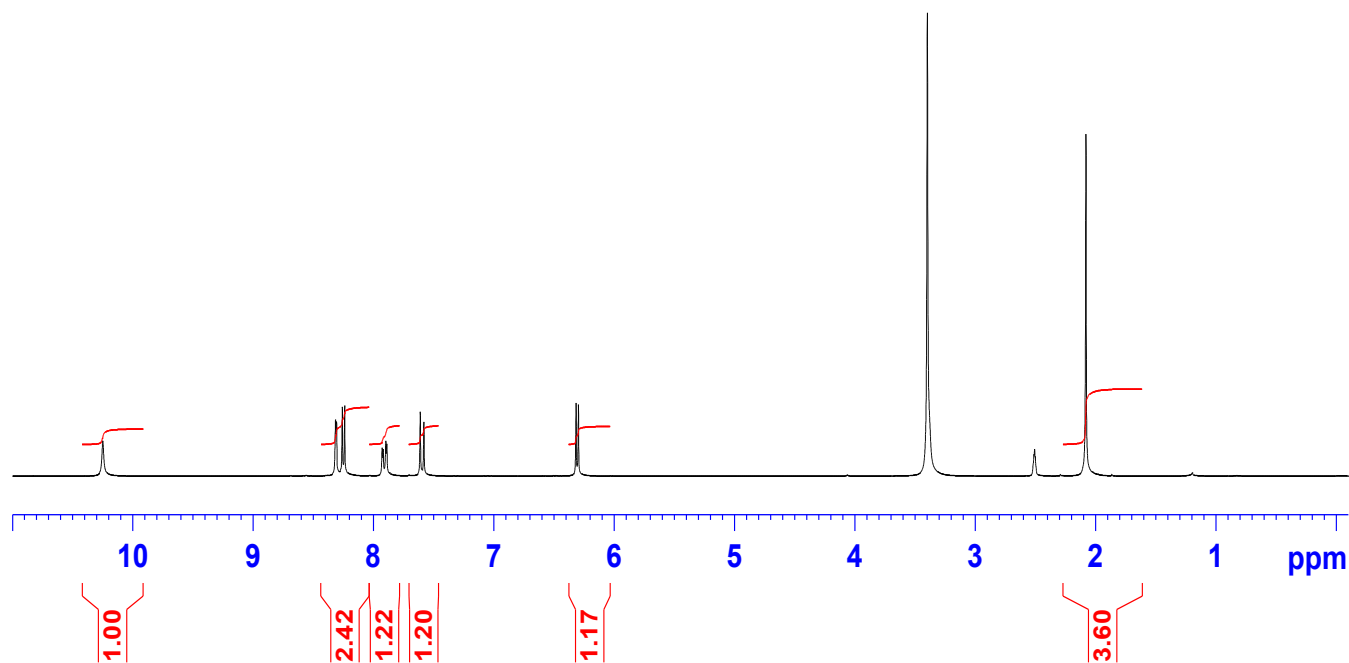

$^{13}\text{C}$  NMR

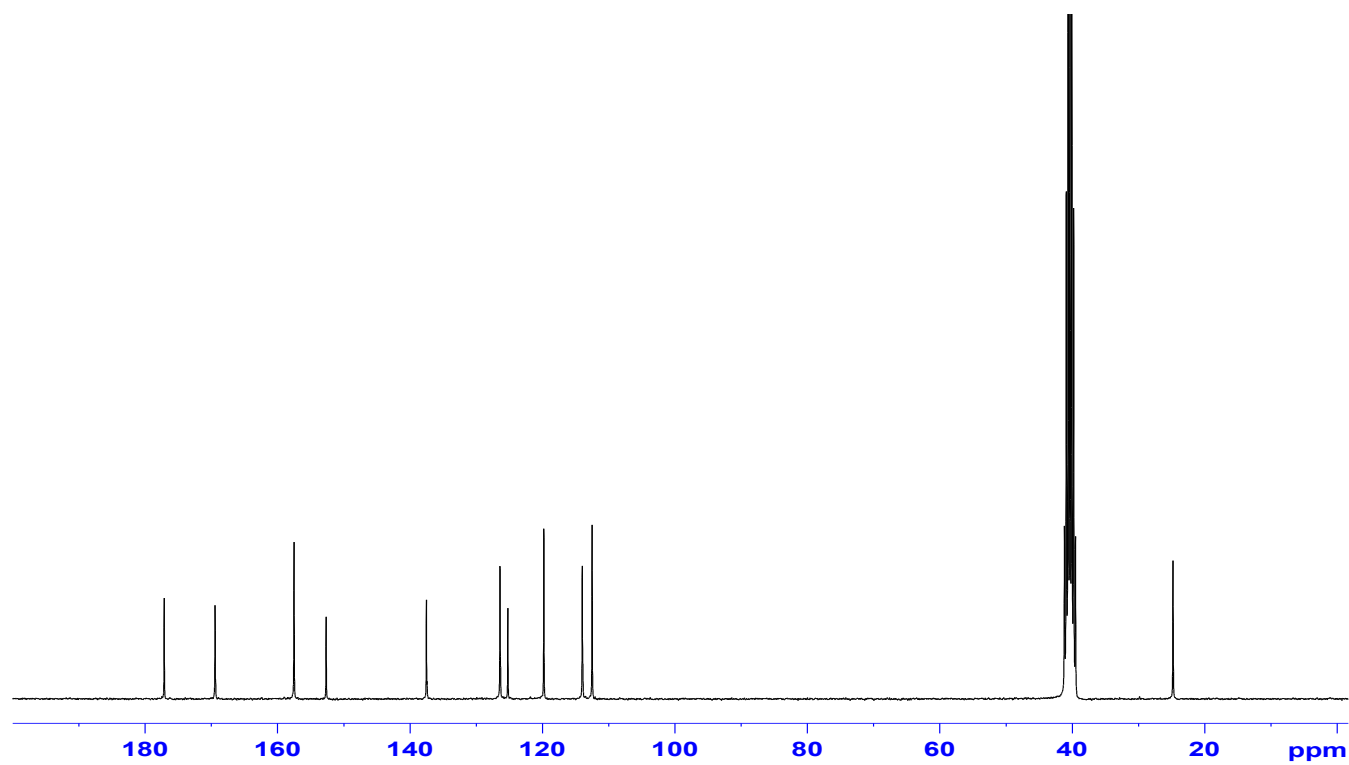

21. 4-(*N*-Acetylamino)chalcone in CD<sub>3</sub>OD (Table 2, entry 21)

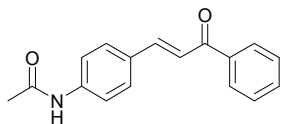

<sup>1</sup>H NMR

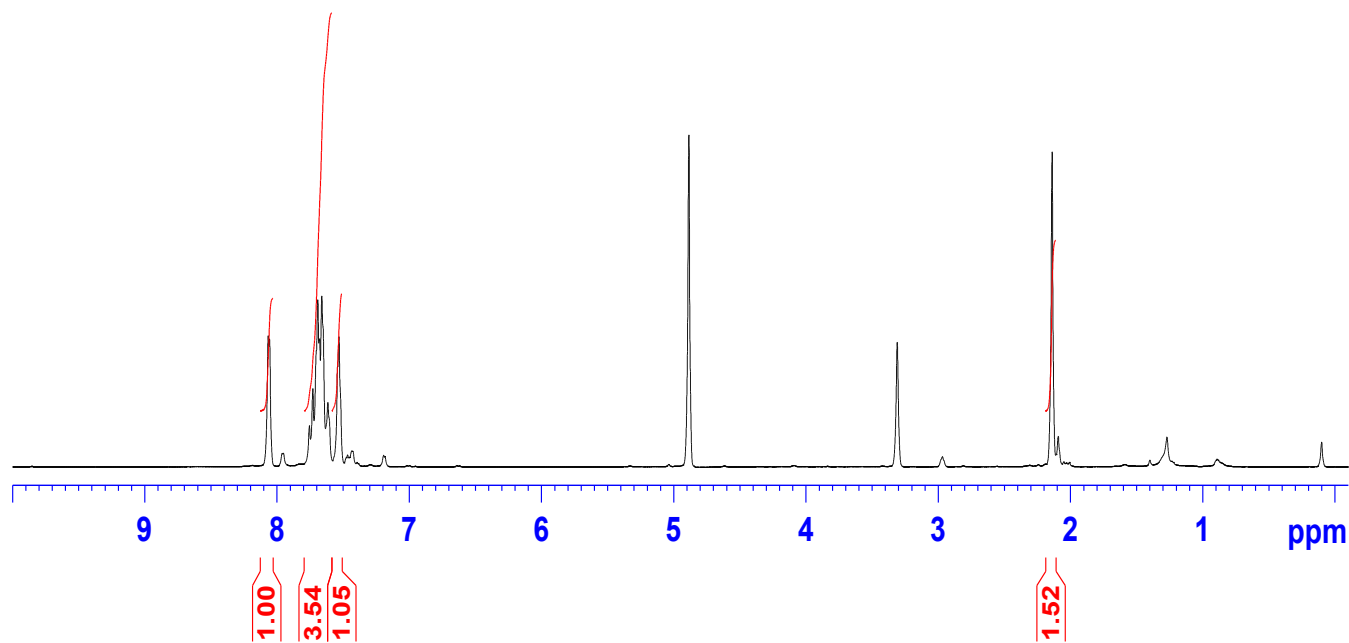

<sup>13</sup>C NMR

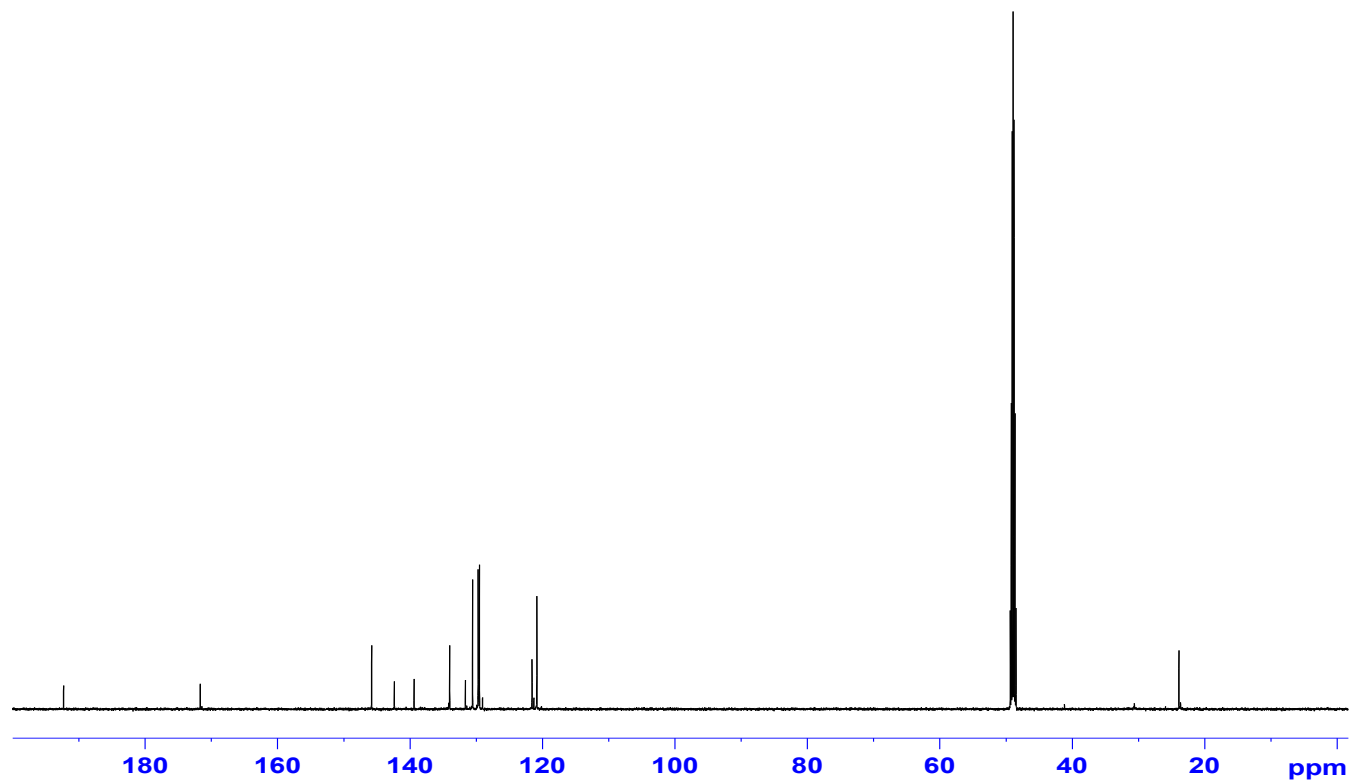

22. *N*-Phenylpropanamide in CD<sub>3</sub>OD (Table 3, entry 3)

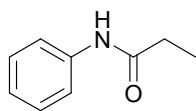

<sup>1</sup>H NMR

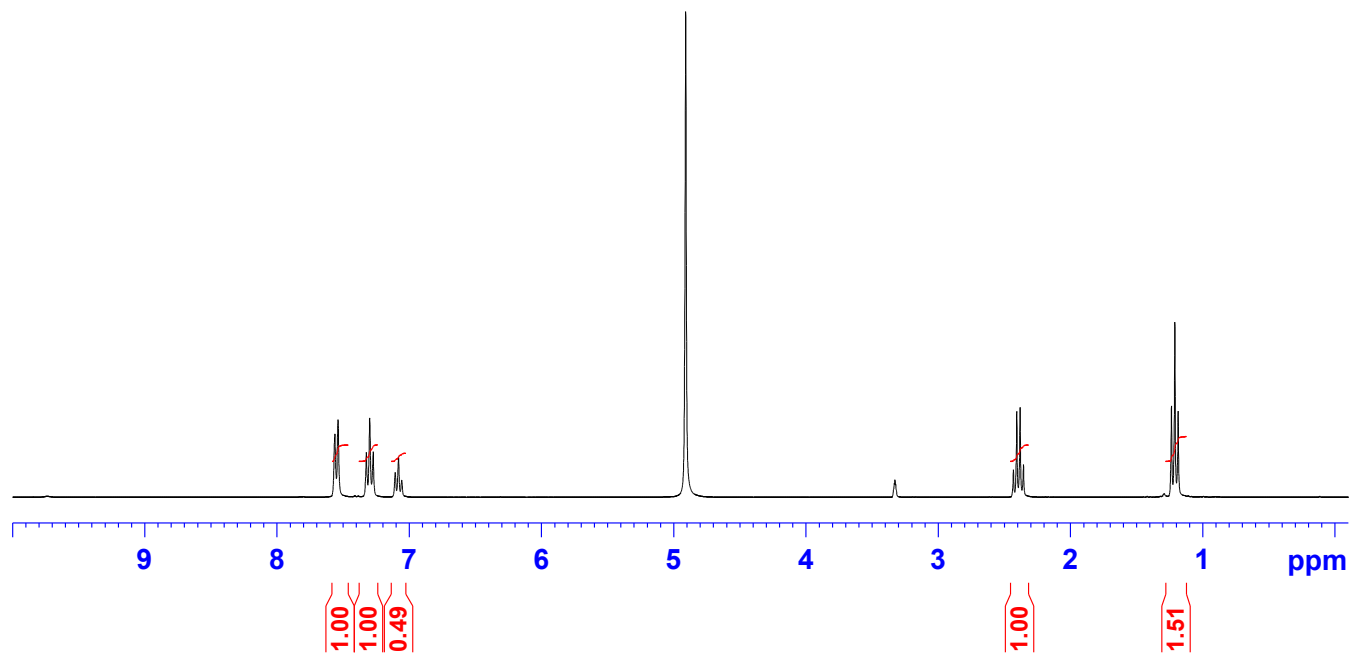

<sup>13</sup>C NMR

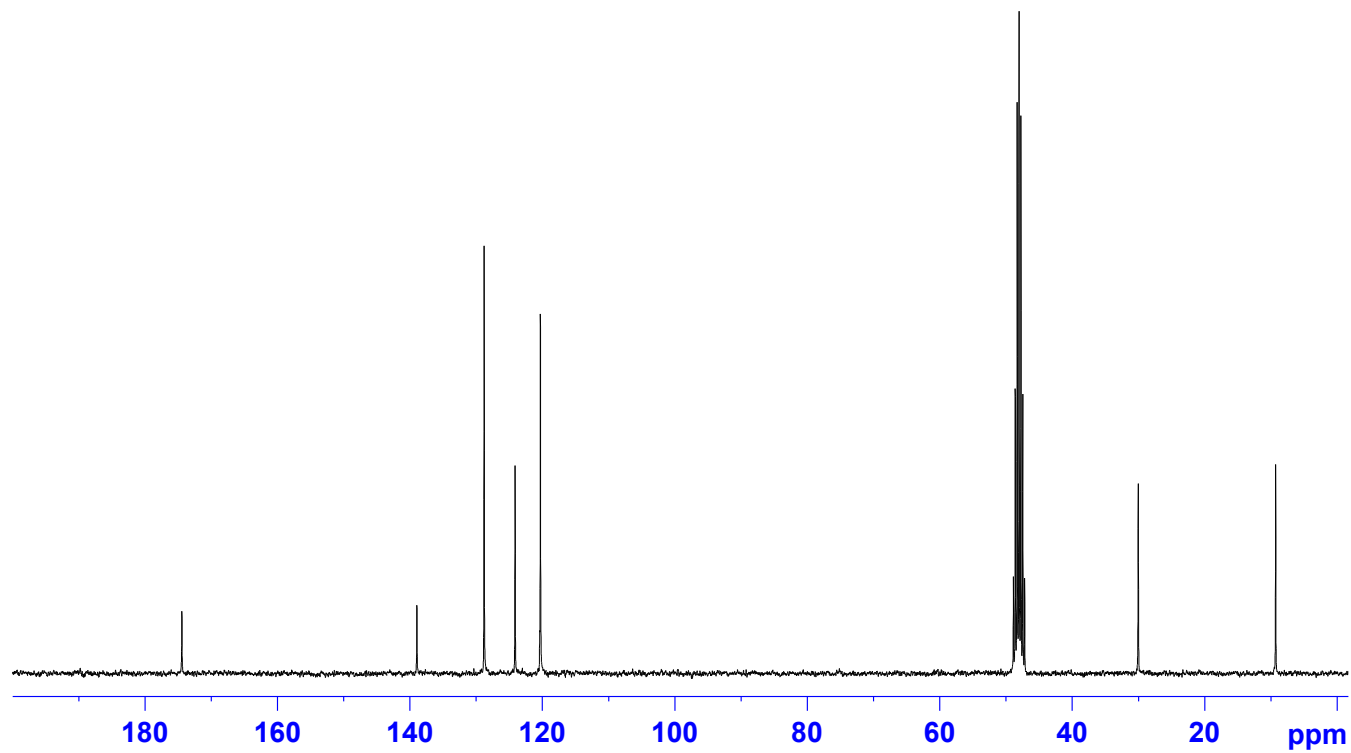



23. *N*-Phenylbutanamide in CD<sub>3</sub>OD (Table 3, entry 4)

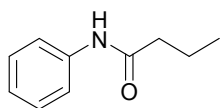

<sup>1</sup>H NMR

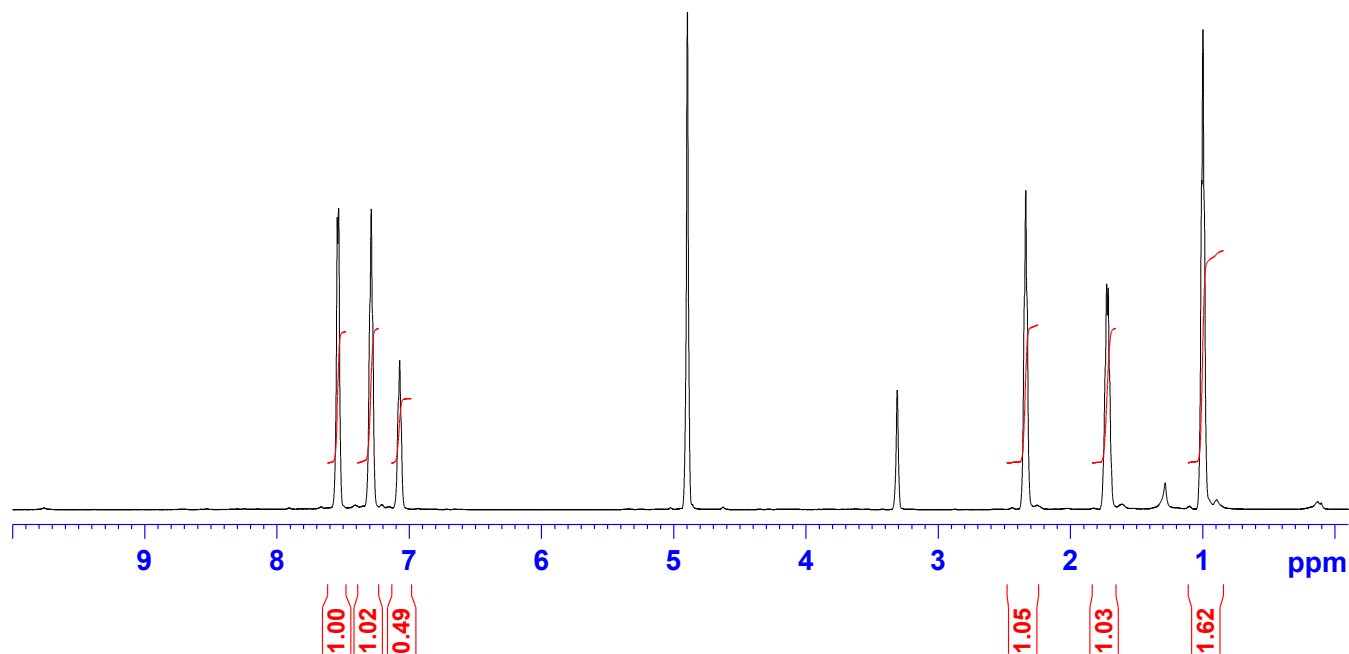

<sup>13</sup>C NMR

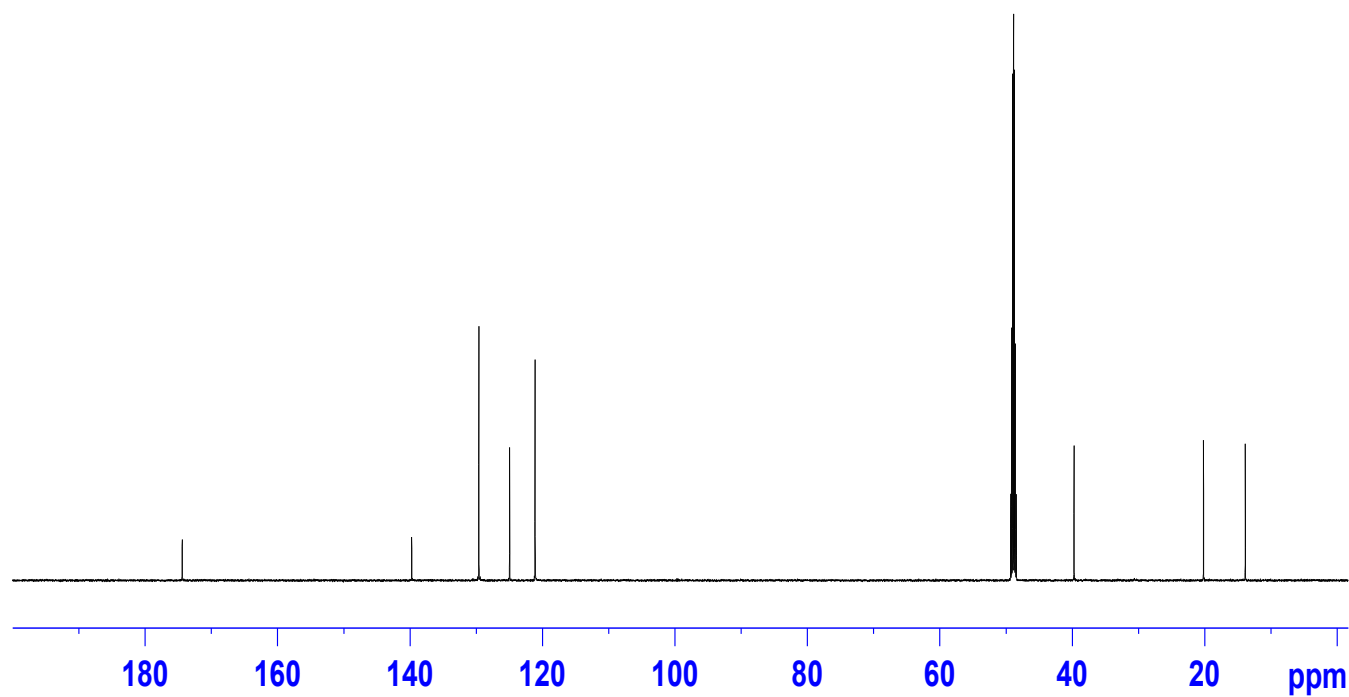

## HRMS (ESI) of isolated compounds

### 1. *N*-Acetylaniline (Table 2, entry 1)

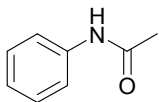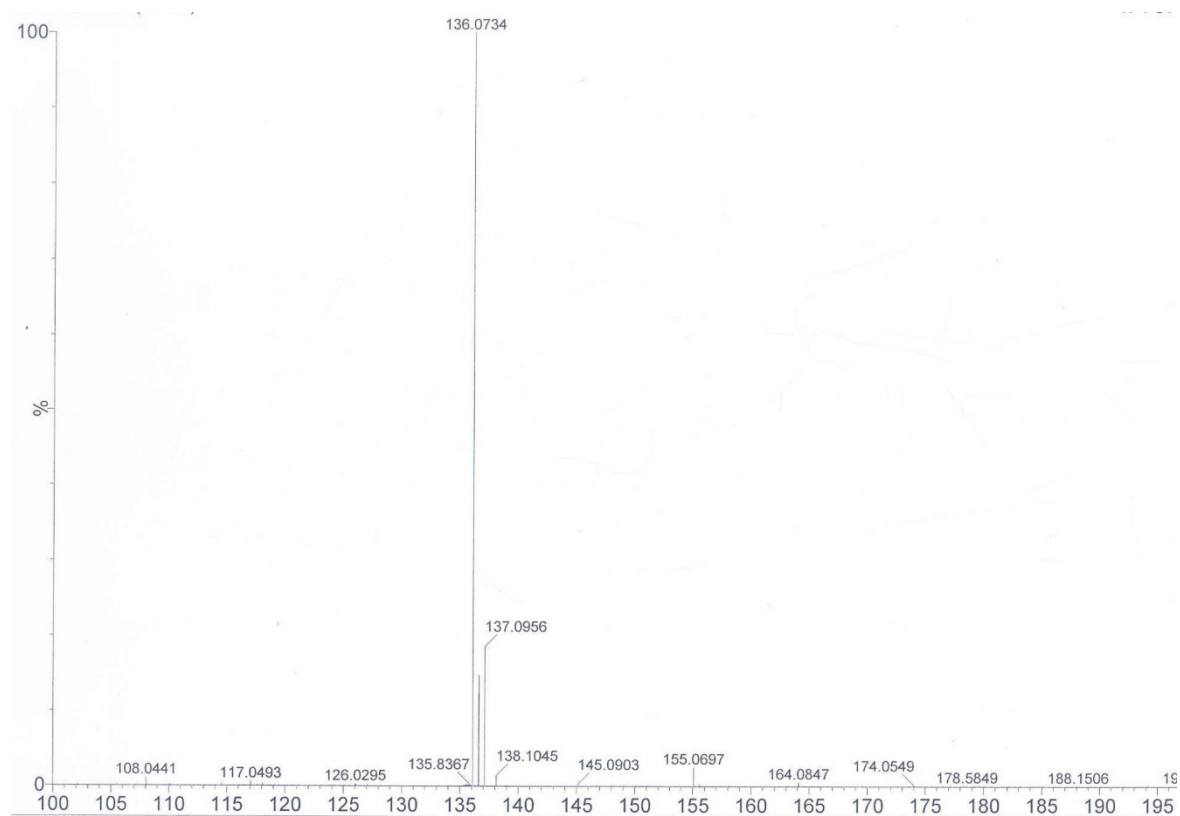

## 2. *N*-Acetyl-4-fluoroaniline (Table 2, entry 2)

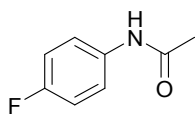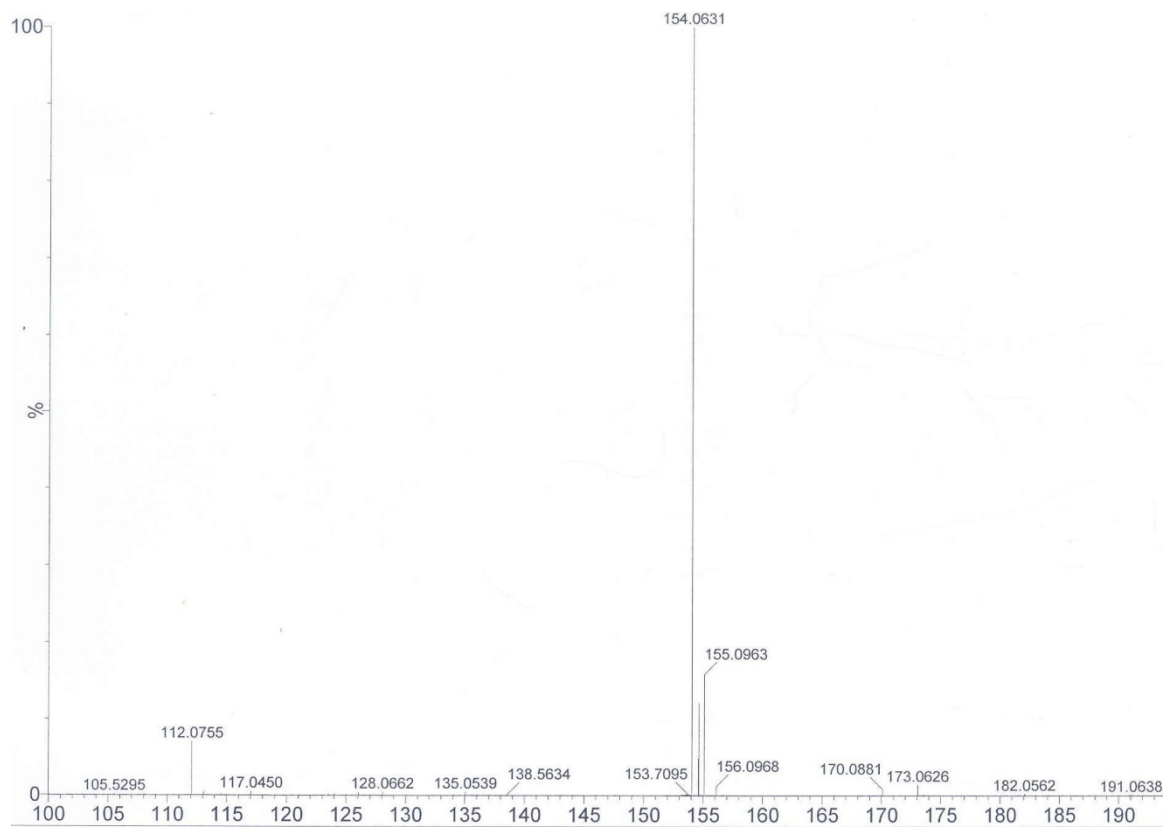

### 3. *N*-Acetyl-4-chloroaniline (Table 2, entry 3)

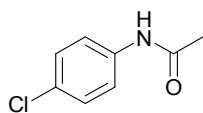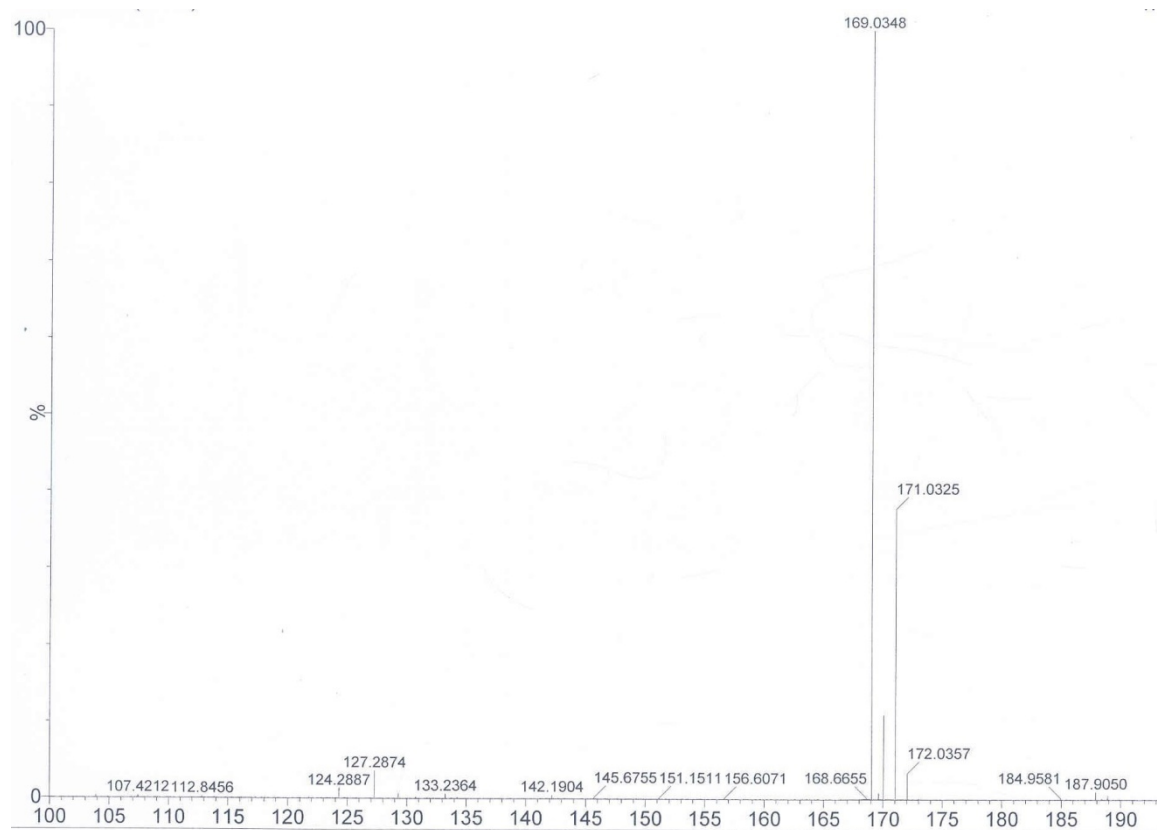

#### 4. *N*-Acetyl-4-bromoaniline (Table 2, entry 4)

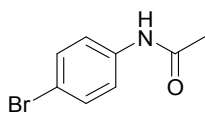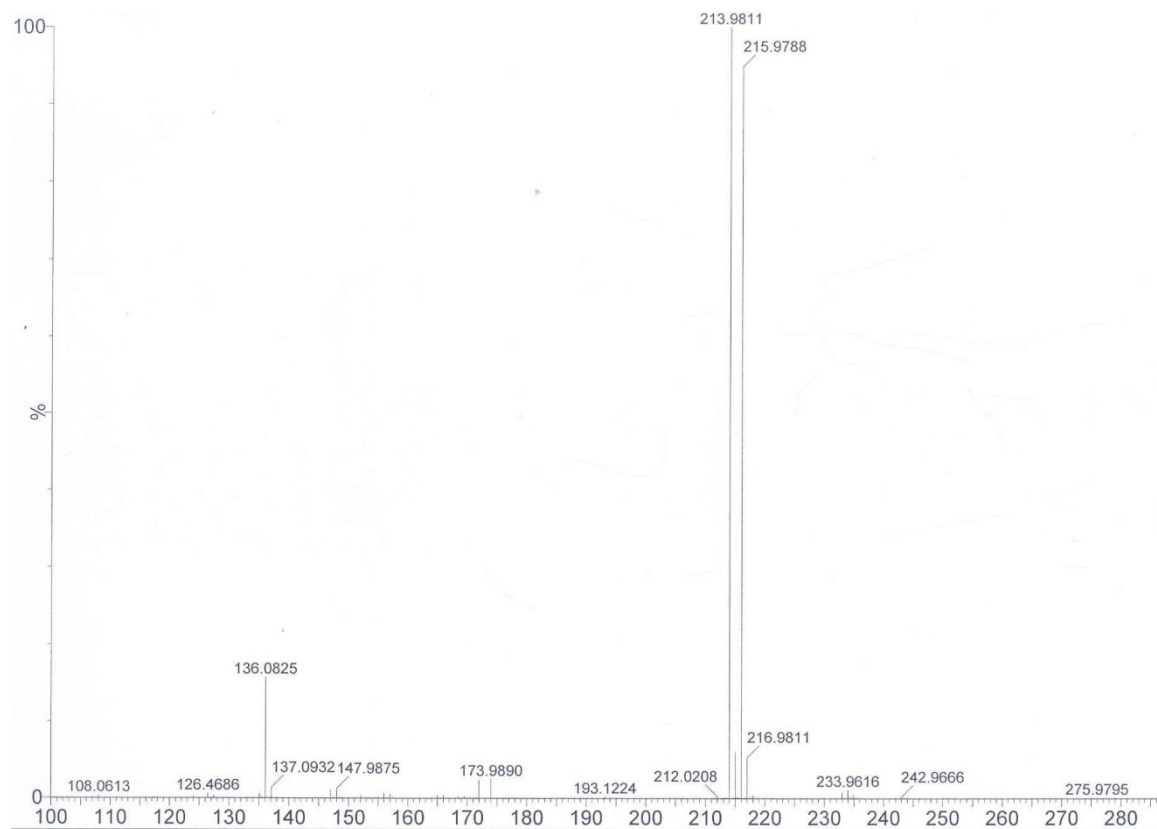

5. 4-(*N*-Acetylamino)toluene (Table 2, entry 5)

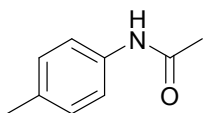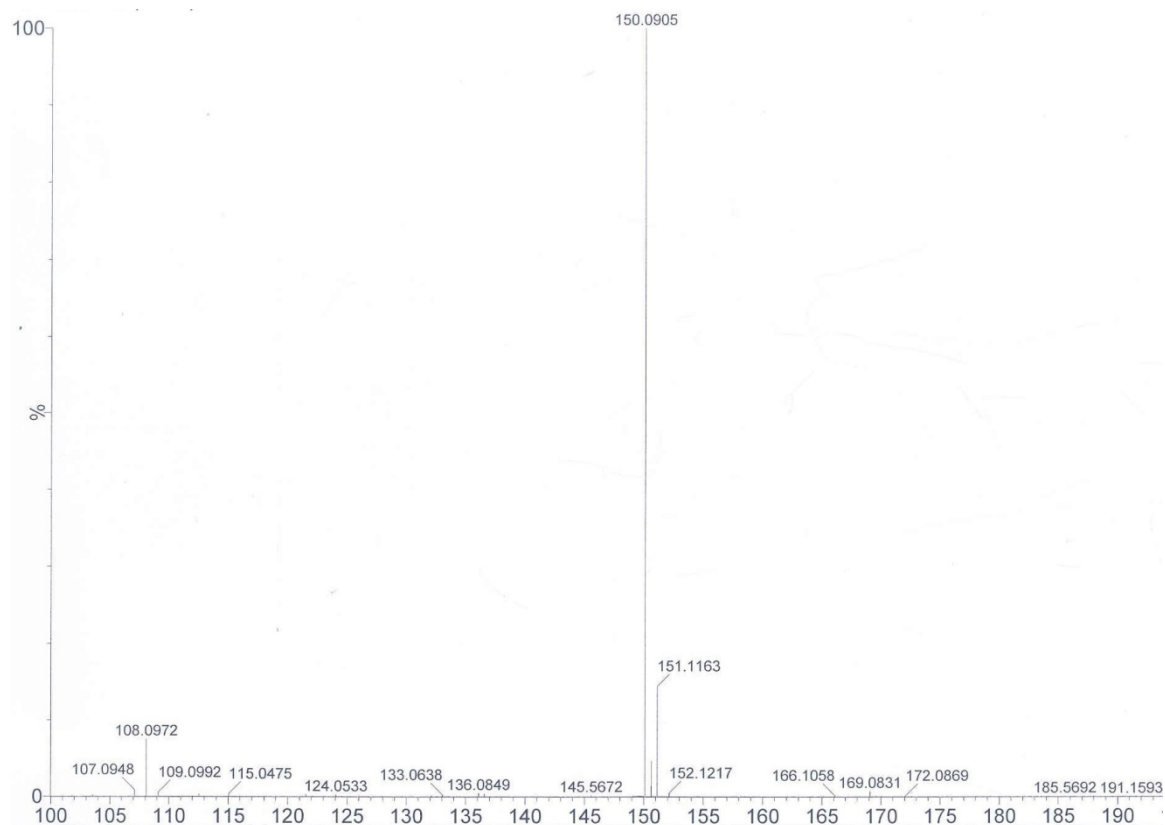

6. 4-(*N*-Acetylamino)phenol (Table 2, entry 6)

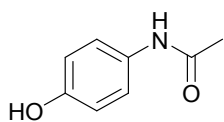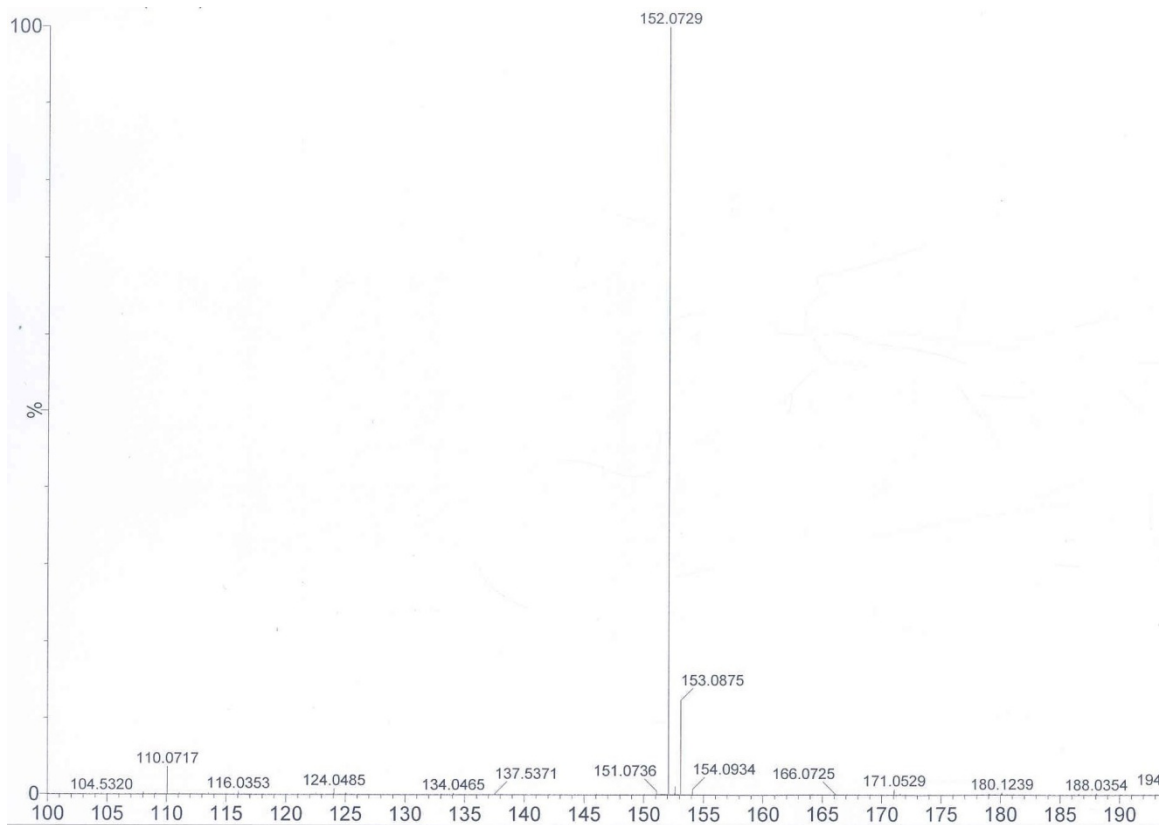

7. 3-(*N*-Acetylamino)benzonitrile (Table 2, entry 8)

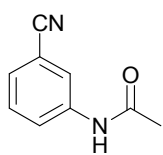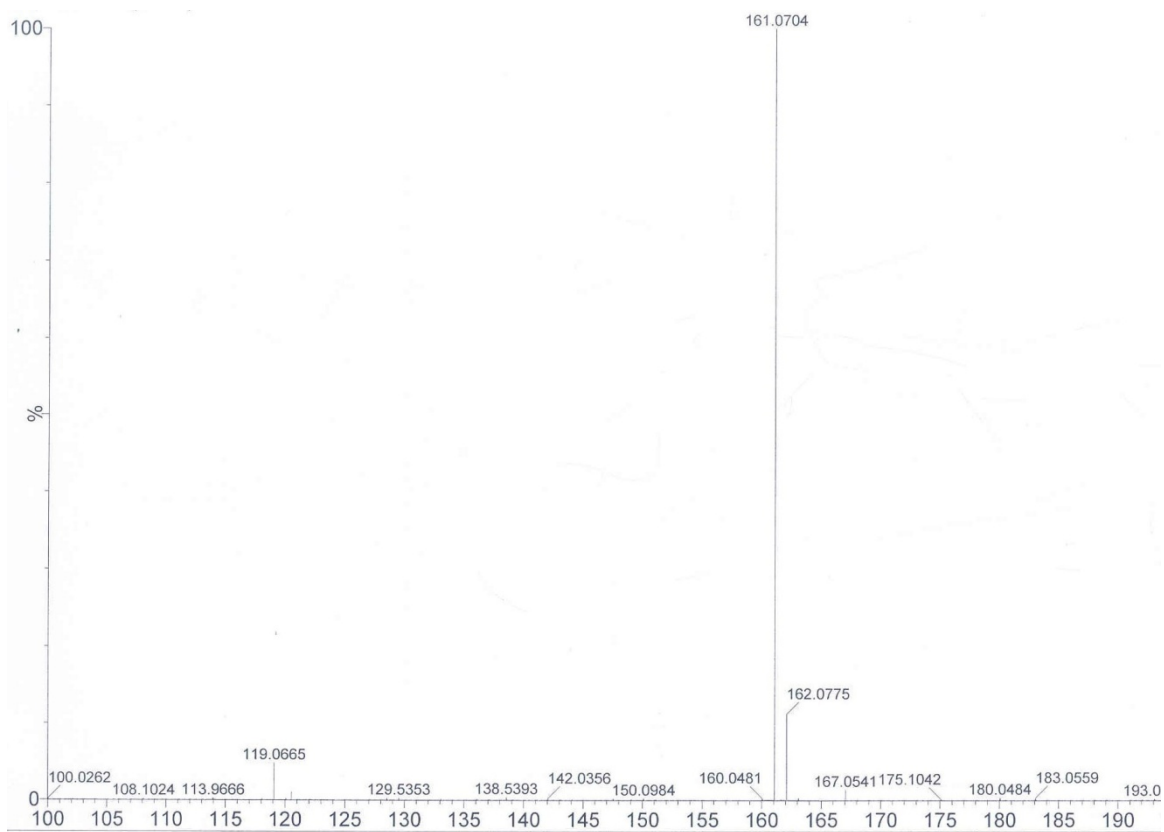



8. 4-(*N*-Acetylamino)acetophenone (Table 2, entry 9)

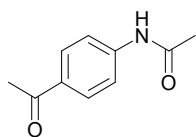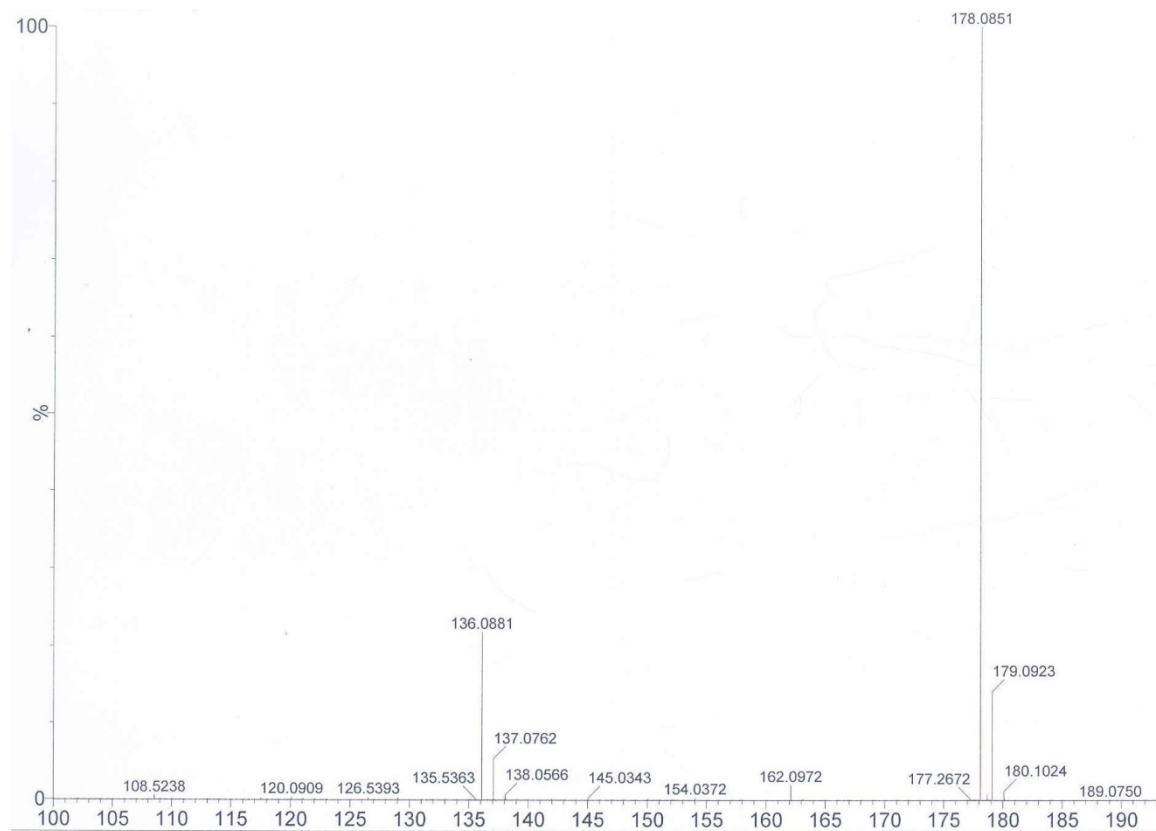

9. 1,4-Di-(*N*-acetylamino)benzene (Table 2, entry 10)

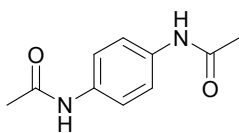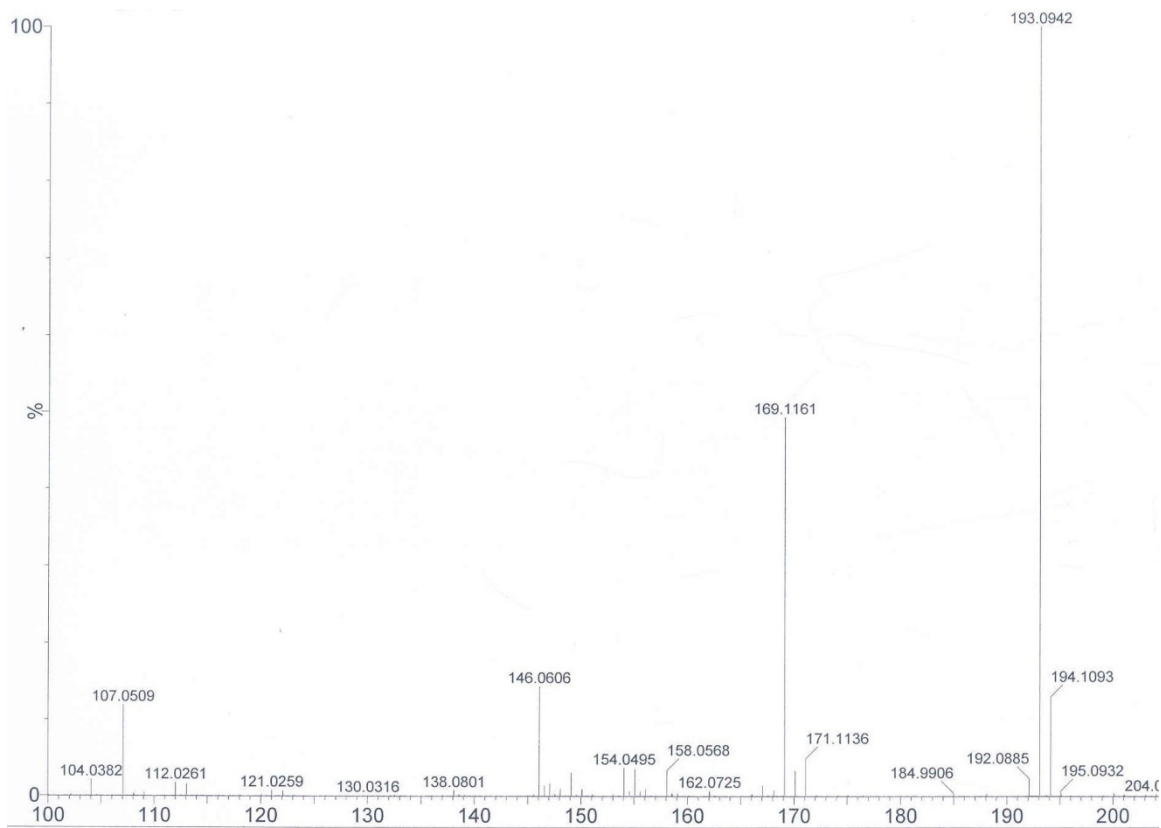

10. *N*-Acetyl-3-nitroaniline (Table 2, entry 12)

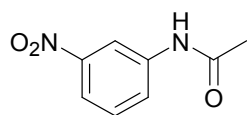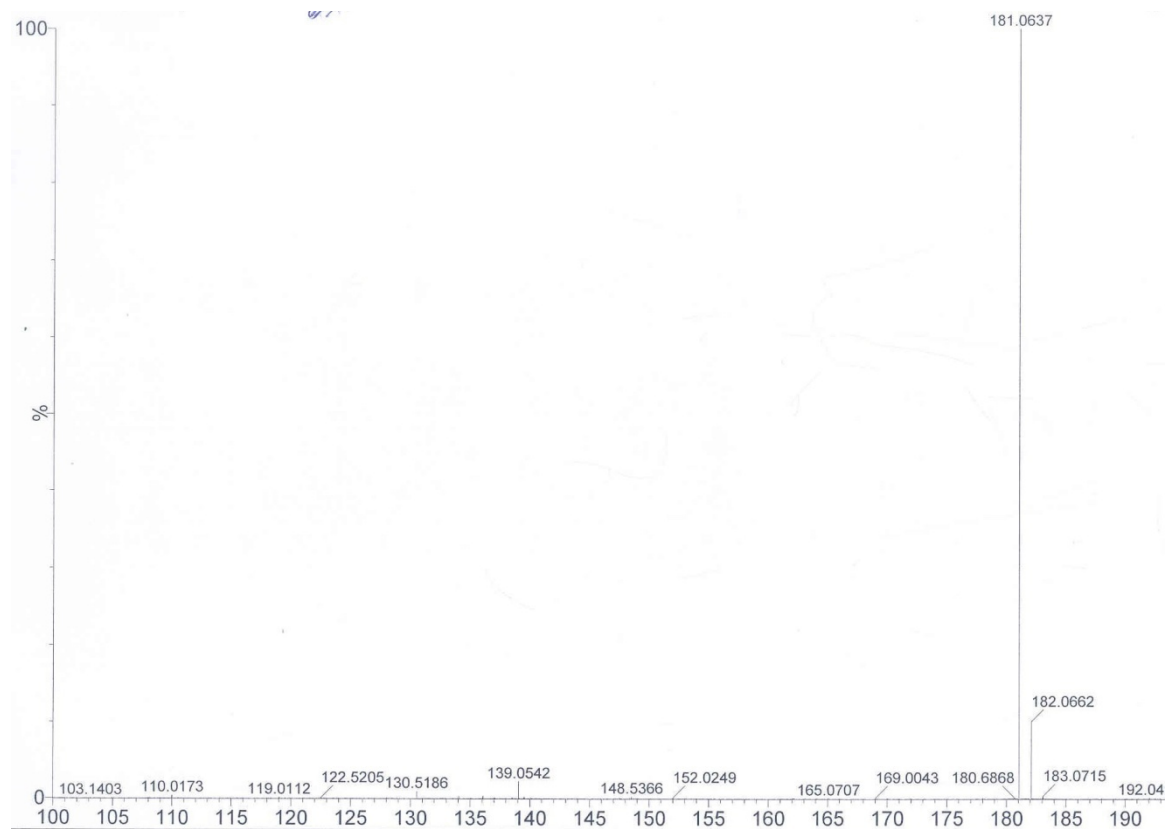

# 11. 1,4-Di-(*N*-acetylamino)benzene (Table 2, entry 13)

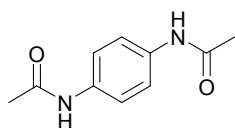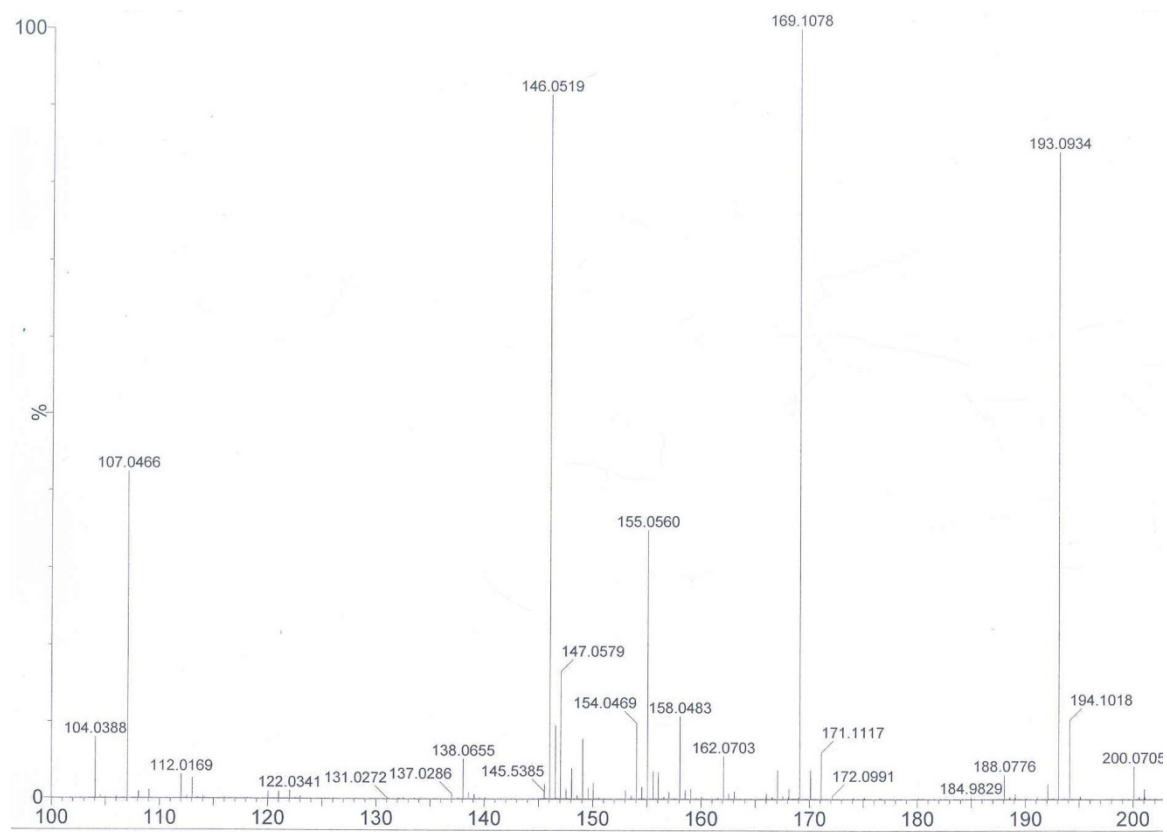

## 12. 2-(*N*-Acetylamino)fluorine (Table 2, entry 14)

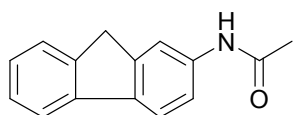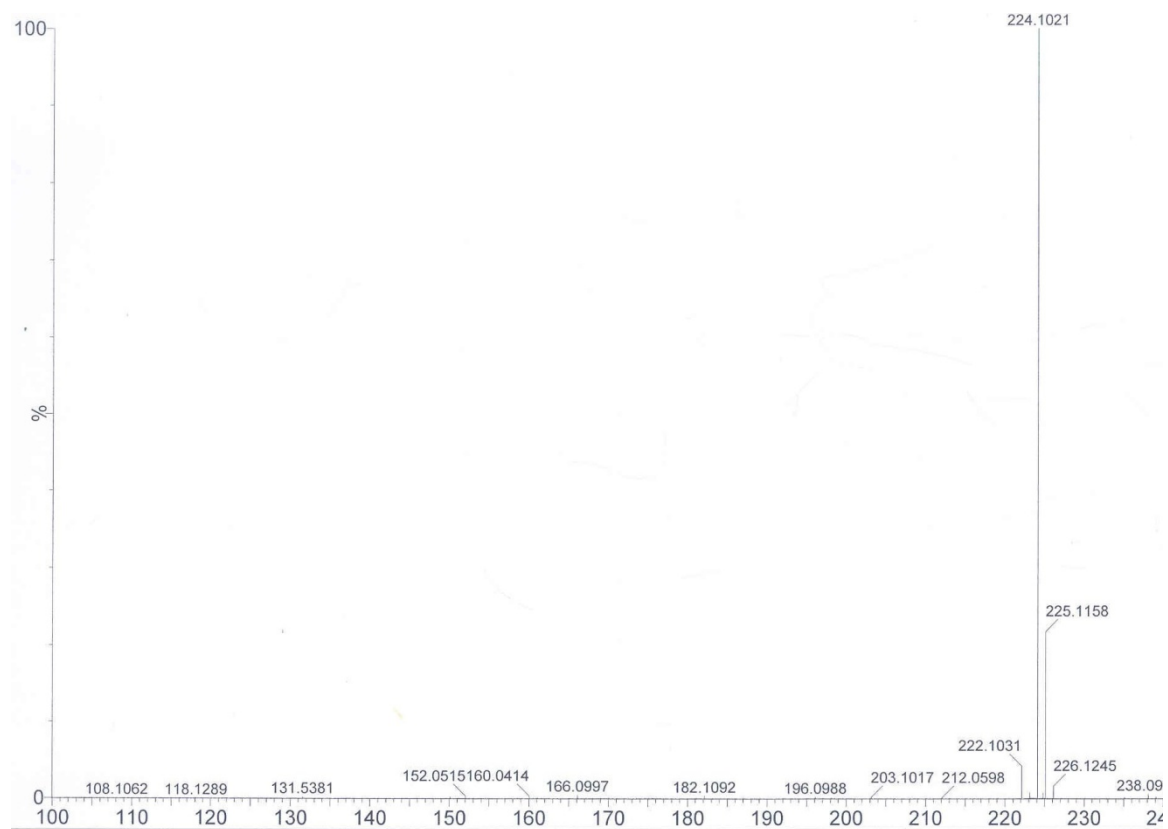

### 13. 4-(*N*-Acetylamino)phthalide (Table 2, entry 15)

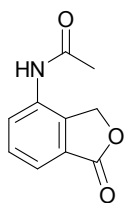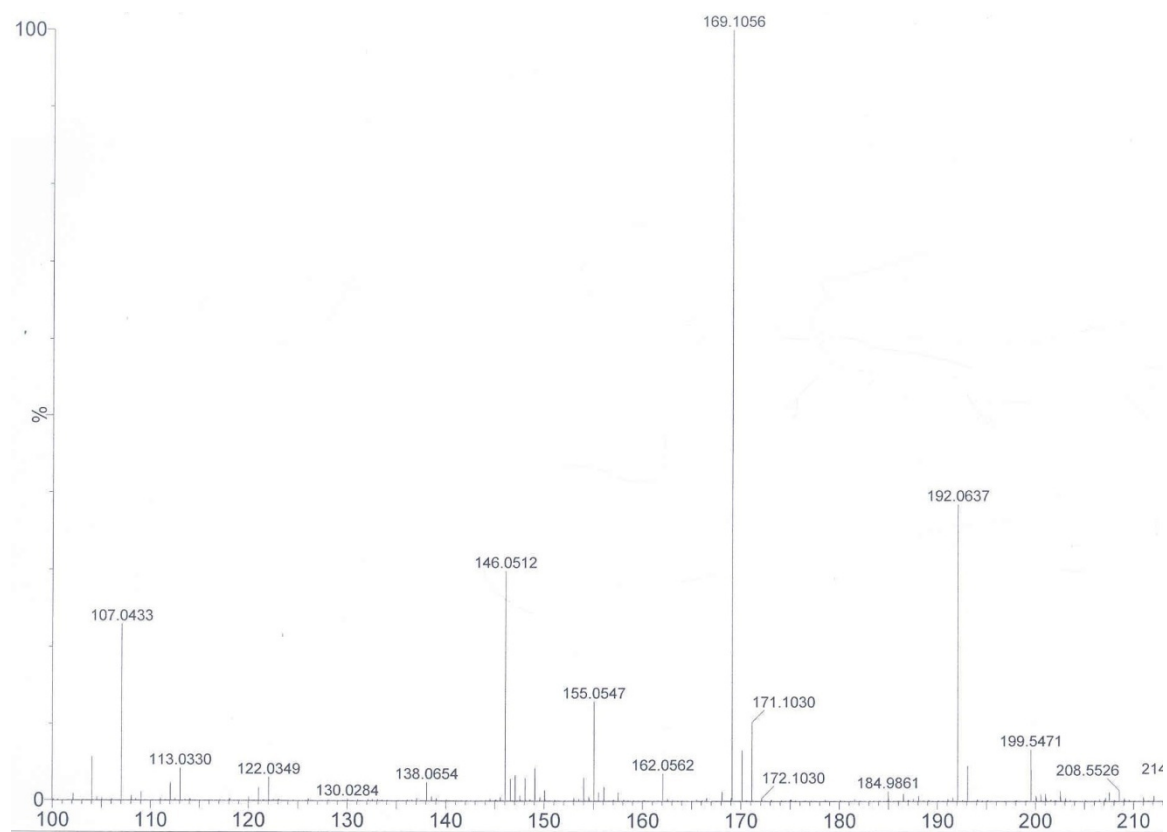

14. 6-(*N*-Acetylamino)benzothiazole (Table 2, entry 16)

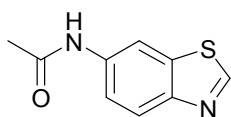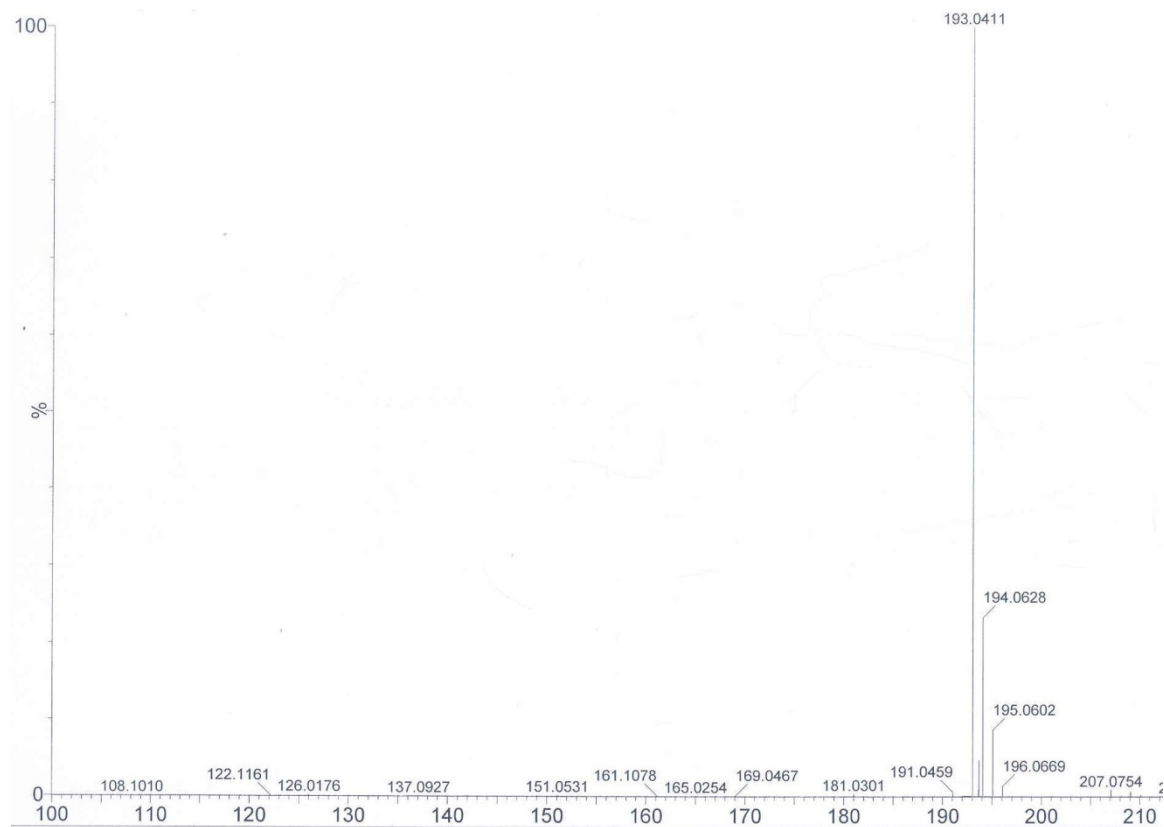

15. 4-(*N*-Acetylamino)-2,1,3-benzothiadiazole (Table 2, entry 17)

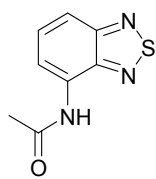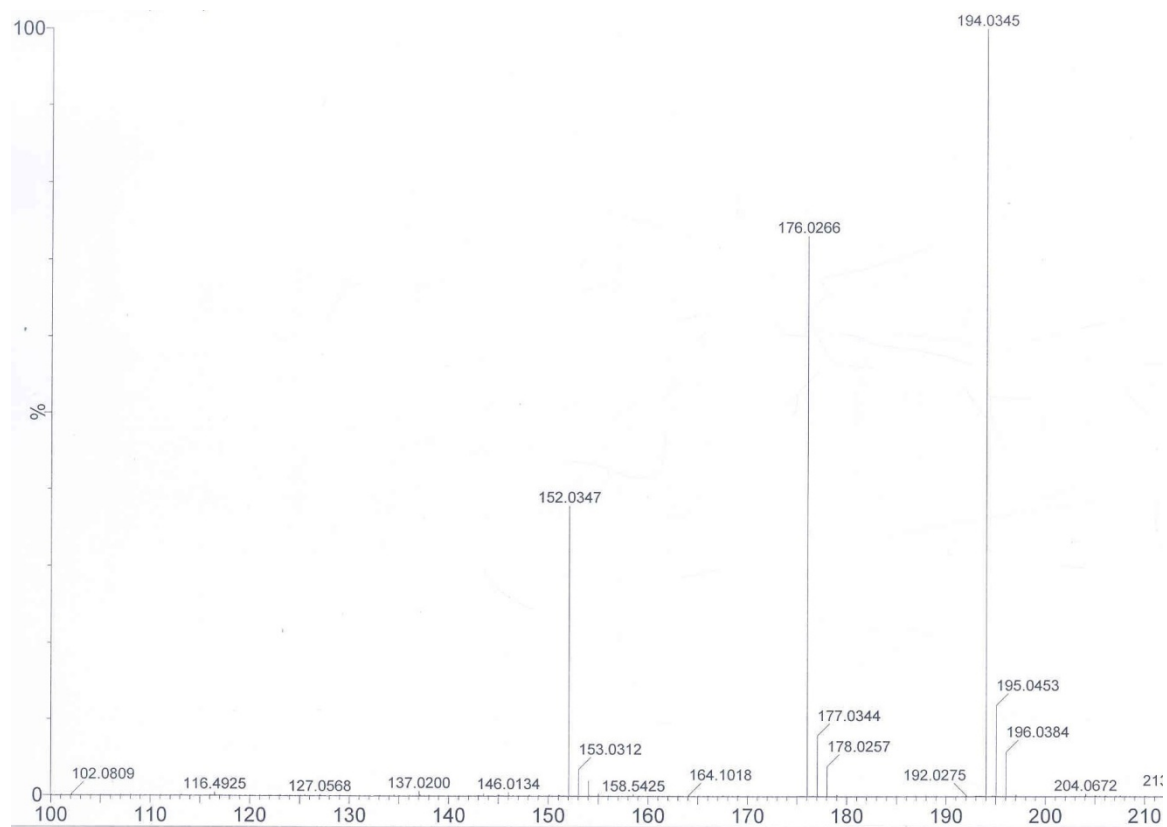



16. 6-(*N*-Acetylamino)chromone (Table 2, entry 20)

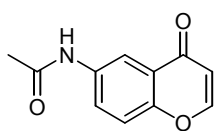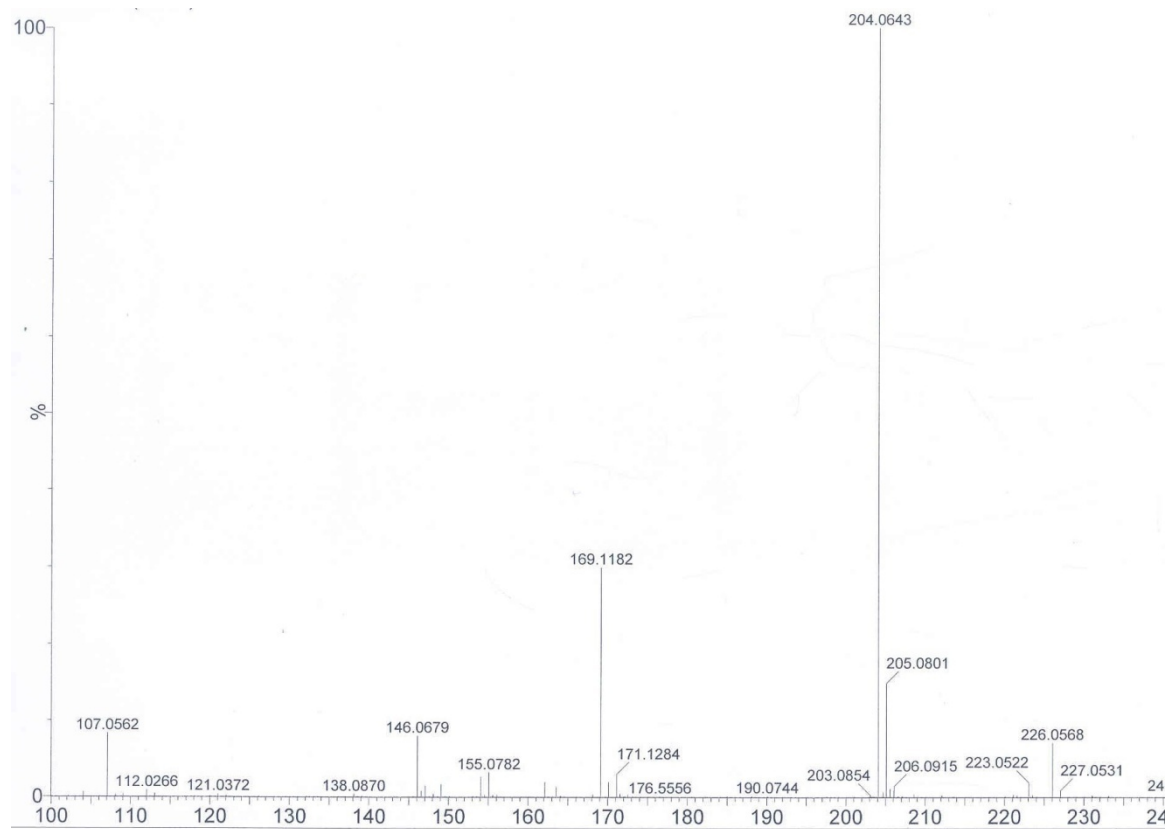

17. 4-(*N*-Acetylamino)chalcone (Table 2, entry 21)

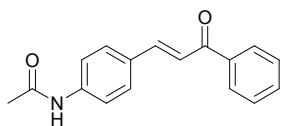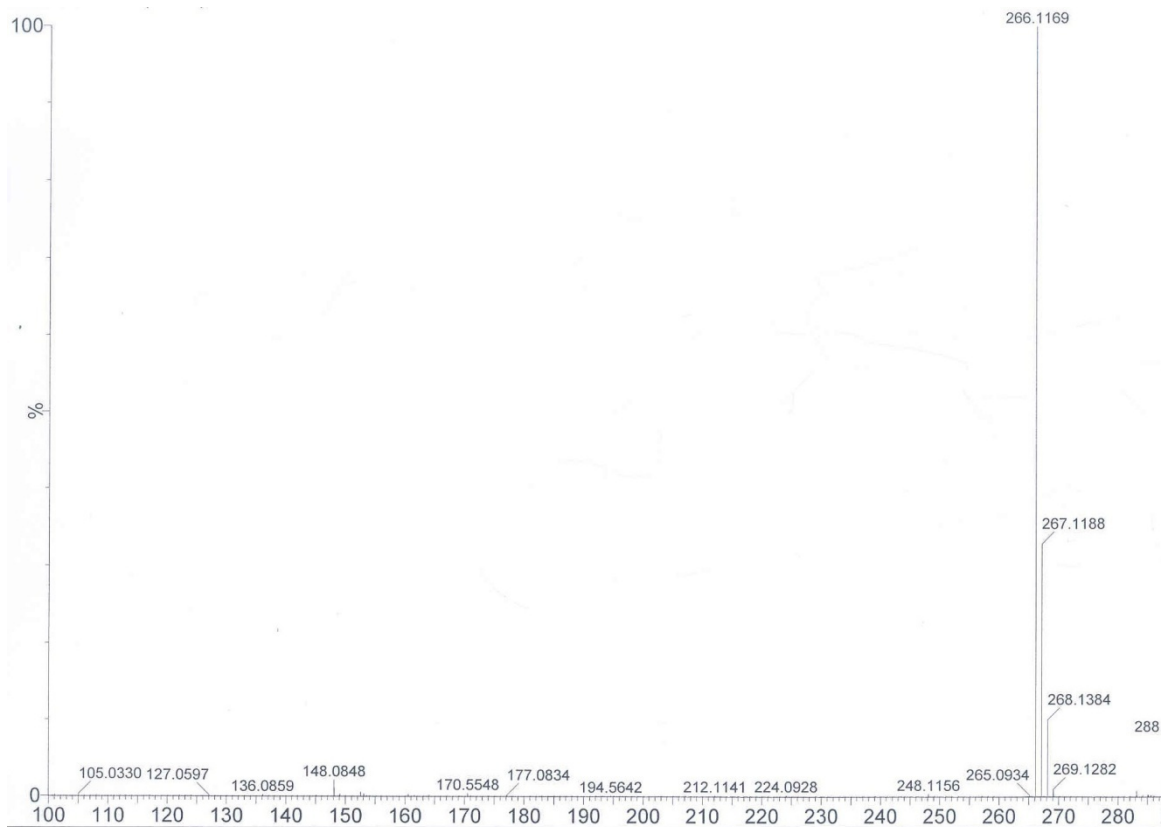

18. *N*-Phenylpropanamide (Table 3, entry 3)

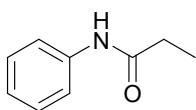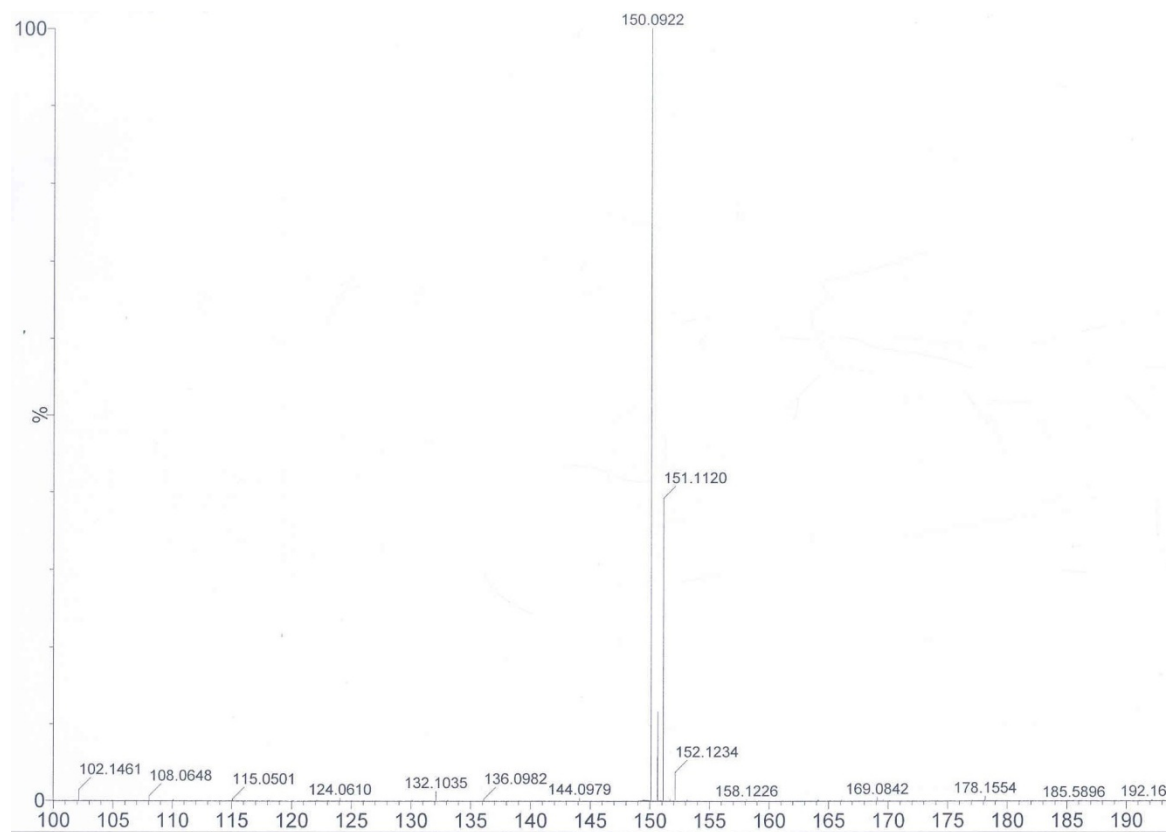

19. *N*-Phenylbutanamide (Table 3, entry 4)

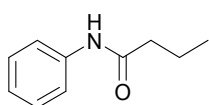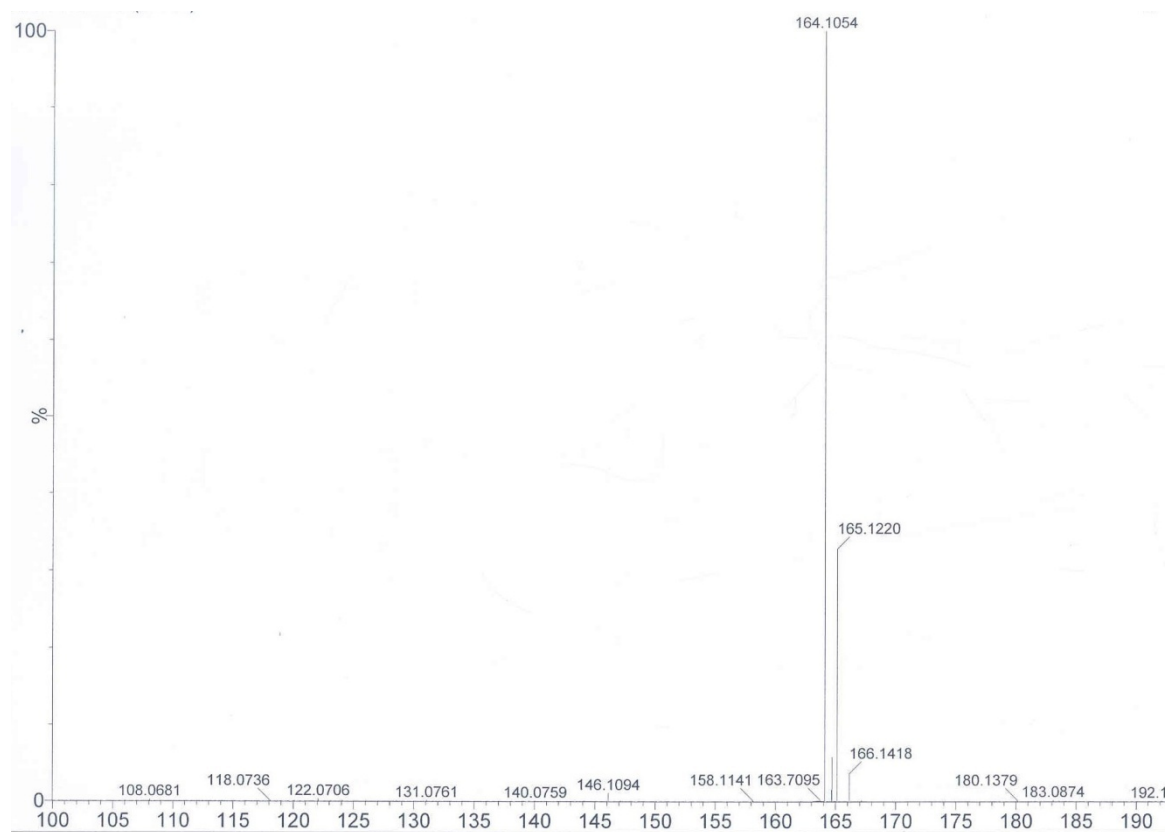

## Mechanistic study

### Experimental procedure for reaction of PMHS with AcOH

PMHS (4.0 mmol) was treated with AcOH (2.0 mL) at 100 °C for 12 h. The solvent was evaporated under reduced pressure and resultant product was dissolved in  $\text{CDCl}_3$  for NMR analysis.

### Experimental procedure for reaction of PMHS with CoPc

PMHS (4.0 mmol) was treated with CoPc (1.0 mol%) at 100 °C for 12 h under solvent free conditions. The resultant product was dissolved in  $\text{CDCl}_3$  for NMR analysis.

### $^1\text{H}$ NMR spectrum of PMHS in $\text{CDCl}_3$

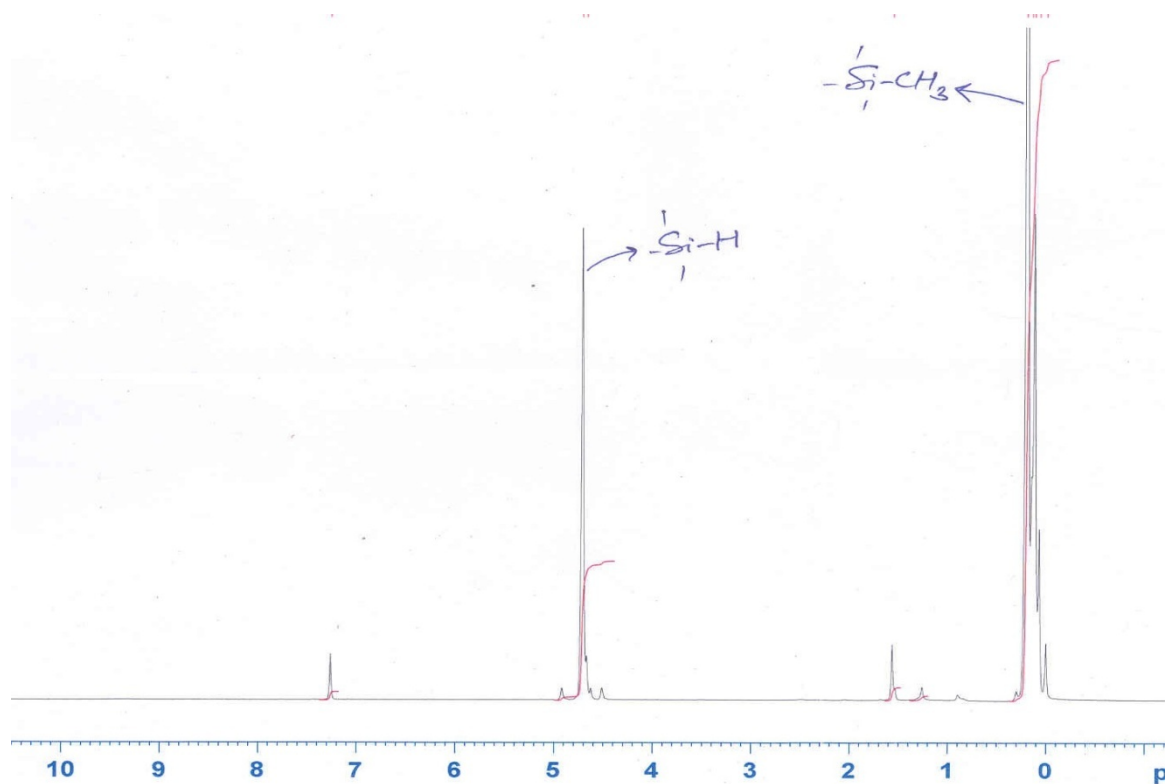

**$^1\text{H}$ NMR spectrum of PMHS + AcOH reaction (600 MHz,  $\text{CDCl}_3$ )**

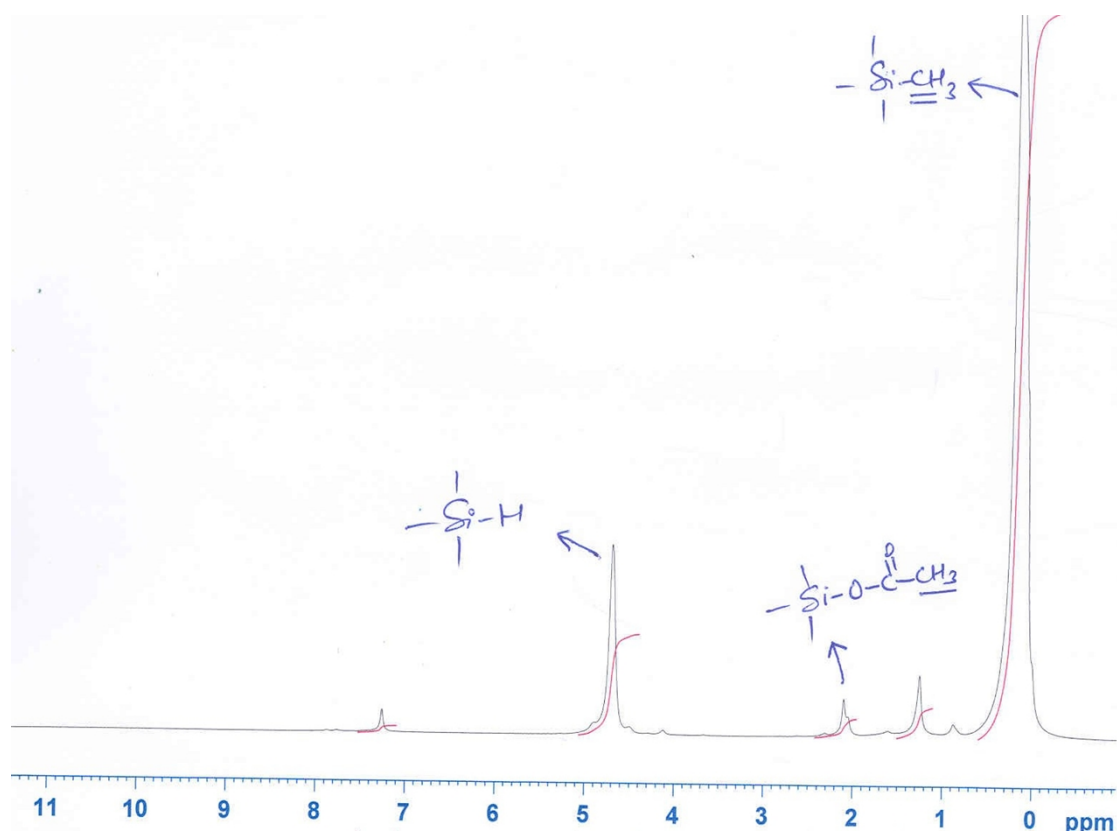

**$^1\text{H}$ NMR spectrum of PMHS + CoPc reaction (600 MHz,  $\text{CDCl}_3$ )**

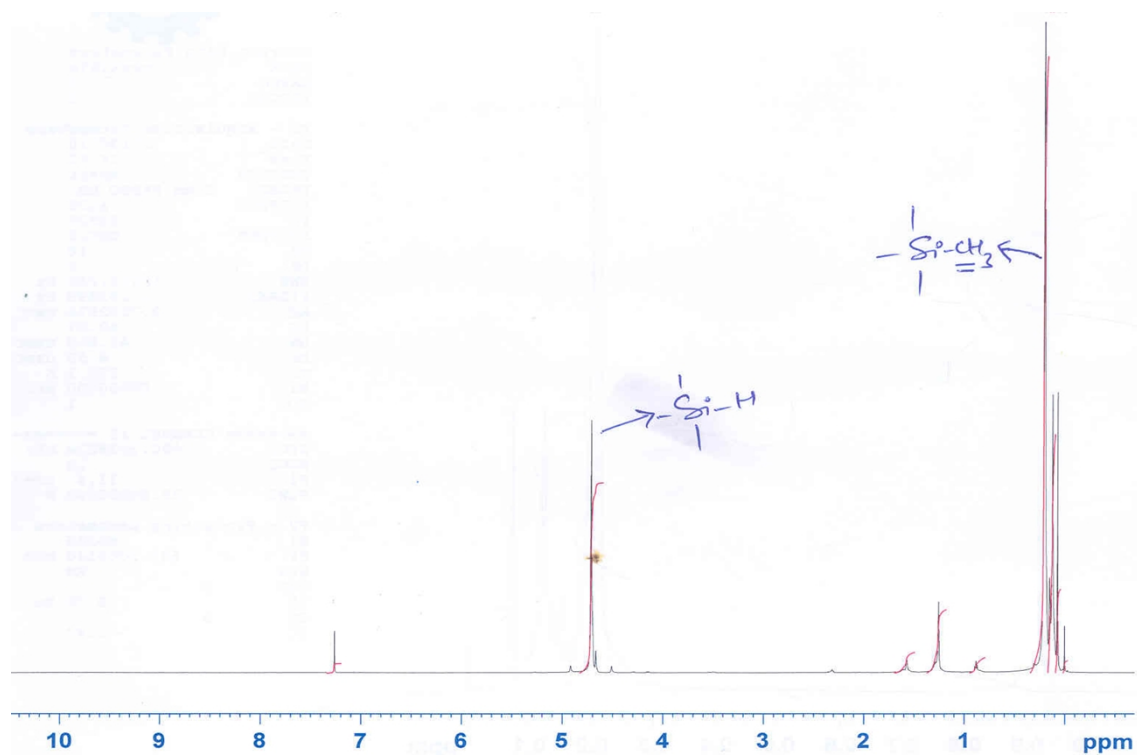

## References

- 1 S. M. Mali, R. P. Bhaisare, H. N. Gopi, *J. Org. Chem.* **2013**, *78*, 5550-5555.
- 2 G. B. Scarfe, M. Tugnait, I. D. Wilson, J. K. Nicholson, *Xenobiotica* **1999**, *29*, 205-216.
- 3 M. Li, L. Hu, X. Cao, H. Hong, J. Lu, H. Gu, *Chem. Eur. J.* **2011**, *17*, 2763-2768.
- 4 C. Ramalingan, Y. T. Park, *J. Org. Chem.* **2007**, *72*, 4536-4538.
- 5 S. Naik, G. Bhattacharjya, B. Talukdar, B. K. Patel, *Eur. J. Org. Chem.* **2004**, 1254-1260.
- 6 A. Pialat, B. Liégault, M. Taillefer, *Org. Lett.* **2013**, *15*, 1764-1767.
- 7 T. Tachinami, T. Nishimura, R. Ushimaru, R. Noyori, H. Naka, *J. Am. Chem. Soc.* **2013**, *135*, 50-53.
- 8 T. M. Gøgsig, L. S. Søbjerg, A. T. Lindhardt, K. L. Jensen, T. Skrydstup, *J. Org. Chem.* **2008**, *73*, 3404-3410.
- 9 J. S. Yadav, A. V. Narsaiah, A. K. Basak, P. R. Goud, D. Sreenu, K. Nagaiah, *J. Mol. Catal. A: Chem.* **2006**, *255*, 78-80.
- 10 M. Novak, K. S. Rangappa, *J. Org. Chem.* **1992**, *57*, 1285-1290.
- 11 C. C. Wamser, R. B. Phillips, *J. Org. Chem.* **1976**, *41*, 2929-2931.
- 12 M. Chakrabarty, A. Mukherji, S. Karmakar, R. Mukherjee, K. Nagai, A. Geronikaki, P. Eleni, *ARKIVOC* **2010**, *xi*, 265-290.
- 13 I. A. Belen'kaya, G. P. Krokhina, S. A. Sirik, S. A. Andronati, *Chem. Heterocyclic Compounds* **1988**, *24*, 96-99.
- 14 C. E. Soll, R. W. Franck, *Heterocycles* **2006**, *70*, 531-540.
- 15 R. Hershfield, G. L. Schmir, *J. Am. Chem. Soc.* **1973**, *95*, 7359-7369.
- 16 M. Cabrera, M. Simoens, G. Falchi, M. L. Lavaggi, O. E. Piro, E. E. Castellano, A. Vidal, A. Azqueta, A. Monge, A. L. de Cerain, G. Sagrera, G. Seoane, H. Cerecetto, M. Gonzalez, *Bioorg. Med. Chem.* **2007**, *15*, 3356-3367.
- 17 S. Nagarajan, P. Ran, P. Shanmugavelan, M. Sathishkumar, A. Ponnuswamy, K. S. Nahm, G. G. Kumar, *New J. Chem.* **2012**, *36*, 1312-1319.
